# Supplementary material for: Systematic review and meta-analysis of complications and mortality of veno-venous extracorporeal membrane oxygenation for refractory acute respiratory distress syndrome
Source: Ann Intensive Care. 2017 May 12;7:51. doi: 10.1186/s13613-017-0275-4 (PMC5429319; doi:10.1186/s13613-017-0275-4)
Supplement: Supplementary file 1 — Additional file 1. Study Database [file 13613_2017_275_MOESM1_ESM.xlsx]

## Sheet: Article List
Title	Authors	Journal	Publication Year	Database	Excluded	Reason Excl.	Patients (n)	Population	MV Days	LIS	PAFI median	PAFI mean	Age (median)	Age (mean)	Prone % Before ECMO	PEEP Before ECMO	Driving Pressure Before ECMO	Pplat Before ECMO	Deads at discharge	SOFA	Center	Start Year	Finish Year	Tmelapse	Pat/yr	Oxyg Heparin coating	Membrane Type	Pump type	Coag Ratio	Max Cannula Size	Canulation	Complications	Deads due to complications related to ECMO	Deads due Bleeding	Deads due ICH	Bleeding	Major Bleeding	Surgical Site	GI bleeding	Pulmonary bleeding	Cannula bleeding	ICH	Hemothorax	Other	Pneumothorax	Limb Ischaemia	GI Ischaemia	DIC	HIT
Extracorporeal membrane oxygenation: a ten-year experience.	Mols G, Loop T, Geiger K, Farthmann E, Benzing A.	Am J Surg. 2000 Aug;180(2):144-54. Review.	2000	pubmed	N		62	Mixed	10	3.2		96		35	81				28		University of Freiburg, Freiburg, Germany	1991	1999	8	7.75	Y		R	1.26	25	F-J	17	5	1	2	12	1				5	2	4	1				3
Extracorporeal Membrane Oxygenation for 2009 Influenza A(H1N1) Acute Respiratory Distress Syndrome.	Davies A, Jones D, Bailey M, Beca J, Bellomo R, Blackwell N, Forrest P, Gattas D, Granger E, Herkes R, Jackson A, McGuinness S, Nair P, Pellegrino V, PettilÃ¤ V, Plunkett B, Pye R, Torzillo P, Webb S, Wilson M, Ziegenfuss M.	JAMA. 2009 Nov 4;302(17):1888-95. doi: 10.1001/jama.2009.1535. Epub 2009 Oct 12.	2009	pubmed	N		68	ARDS (H1N1)	2	3.8		56	34.4		18	18			14		Multicenter Australia	2009	2009			Y	HF-PMP	C			Mixed	62	10	4	6	41			7	7	15	6		6
A new miniaturized system for extracorporeal membrane oxygenation in adult respiratory failure.	MÃ¼ller T, Philipp A, Luchner A, Karagiannidis C, Bein T, Hilker M, Rupprecht L, Langgartner J, Zimmermann M, Arlt M, Wenger J, Schmid C, Riegger GA, Pfeifer M, Lubnow M.	Crit Care. 2009;13(6):R205. doi: 10.1186/cc8213. Epub 2009 Dec 17.	2009	pubmed	N		60	Mixed	1	3.6		64	53			16	10	36	33		University Medical Center Regensburg, Germany	2006	2008	2	30	Y	HF-PMP	C	1.5	23	F-J	28	1	1		21	1	11		3	2			5				1
Randomised controlled trial and parallel economic evaluation of conventional ventilatory support versus extracorporeal membrane oxygenation for severe adult respiratory failure (CESAR).	Peek GJ, Elbourne D, Mugford M, Tiruvoipati R, Wilson A, Allen E, Clemens F, Firmin R, Hardy P, Hibbert C, Jones N, Killer H, Thalanany M, Truesdale A.	Health Technol Assess. 2010 Jul;14(35):1-46. doi: 10.3310/hta14350.	2010	pubmed	N		68	Mixed	1.46	3.5	70			39.9	47	14.5			33		The Glenfield Hospital, Leicester, UK	2001	2006	5	13.6		HF-PP	R	1.58			1	1	1		1	1				1
Referral to an extracorporeal membrane oxygenation center and mortality among patients with severe 2009 influenza A(H1N1).	Noah MA, Peek GJ, Finney SJ, Griffiths MJ, Harrison DA, Grieve R, Sadique MZ, Sekhon JS, McAuley DF, Firmin RK, Harvey C, Cordingley JJ, Price S, Vuylsteke A, Jenkins DP, Noble DW, Bloomfield R, Walsh TS, Perkins GD, Menon D, Taylor BL, Rowan KM.	JAMA. 2011 Oct 19;306(15):1659-68. doi: 10.1001/jama.2011.1471. Epub 2011 Oct 5.	2011	pubmed	N		69	ARDS (H1N1)	4	3.5	54.9		34	36.5	39.1304	15			20	9.1	Multicenter UK	2009	2010									38	9	1	7	36		6	2	1	3	8	4	12					1
The Italian ECMO network experience during the 2009 influenza A(H1N1) pandemic: preparation for severe respiratory emergency outbreaks.	Patroniti N, Zangrillo A, Pappalardo F, Peris A, Cianchi G, Braschi A, Iotti GA, Arcadipane A, Panarello G, Ranieri VM, Terragni P, Antonelli M, Gattinoni L, Oleari F, Pesenti A.	Intensive Care Med. 2011 Sep;37(9):1447-57.	2011	Referenced	N		60	ARDS	2	3.625	63		41.5		26.6667	16	16.5	32.5	19	6.5	Multicenter Italy	2009	2010	1		Y	HF-PMP	C	1.6		Mixed	16	1		1	16	10		2	1	4
The PRESERVE mortality risk score and analysis of long-term outcomes after extracorporeal membrane oxygenation for severe acute respiratory distress syndrome.	Schmidt M, Zogheib E, RozÃ© H, Repesse X, Lebreton G, Luyt CE, Trouillet JL, BrÃ©chot N, Nieszkowska A, Dupont H, Ouattara A, Leprince P, Chastre J, Combes A.	Intensive Care Med. 2013 Oct;39(10):1704-13. doi: 10.1007/s00134-013-3037-2. Epub 2013 Aug 2.	2013	pubmed	N		140	ARDS	5			53	44		60.7143	10	22	32	56	12	Multicenter France	2008	2012			Y	HF	C	1.357		Mixed	118	10	6	4	65	10		17		29	4	12	28
Outcome of acute respiratory distress syndrome patients treated with extracorporeal membrane oxygenation and brought to a referral center.	Roch A, Hraiech S, Masson E, Grisoli D, Forel JM, Boucekine M, Morera P, Guervilly C, Adda M, Dizier S, Toesca R, Collart F, Papazian L.	Intensive Care Med. 2014 Jan;40(1):74-83. doi: 10.1007/s00134-013-3135-1. Epub 2013 Oct 30.	2014	pubmed	N		85	Mixed	2	3.5		60		47	20			32	48	9	Marseille North Hospital, France	2009	2013	4	21.25	Y	HF	C	1.28	25	F-J	33	4	2	2	25	5			10	10	2	1	2
Impact of Acute Kidney Injury on Outcome in Patients With Severe Acute Respiratory Failure Receiving Extracorporeal Membrane Oxygenation.	Haneya A, Diez C, Philipp A, Bein T, Mueller T, Schmid C, Lubnow M.	Crit Care Med. 2015 Sep;43(9):1898-906. doi: 10.1097/CCM.0000000000001141.	2015	pubmed	N		262	Mixed	1	3.3		64		49	73.28				106	12	University Medical Center Regensburg, Germany	2007	2012	5	52.4	Y	HF-PMP/PP	C	1.571	31	Mixed	48				38
Mechanical ventilation management during extracorporeal membrane oxygenation for acute respiratory distress syndrome: a retrospective international multicenter study.	Schmidt M, Stewart C, Bailey M, Nieszkowska A, Kelly J, Murphy L, Pilcher D, Cooper DJ, Scheinkestel C, Pellegrino V, Forrest P, Combes A, Hodgson C.	Crit Care Med. 2015 Mar;43(3):654-64. doi: 10.1097/CCM.0000000000000753.	2015	pubmed	N		52	Mixed	1			75		37	1.92308	14	17.1	31.1	13	10.8	Alfred Hospital, Australia	2007	2013	6	8.66667						Mixed	19				17	17								2
Mechanical ventilation management during extracorporeal membrane oxygenation for acute respiratory distress syndrome: a retrospective international multicenter study.	Schmidt M, Stewart C, Bailey M, Nieszkowska A, Kelly J, Murphy L, Pilcher D, Cooper DJ, Scheinkestel C, Pellegrino V, Forrest P, Combes A, Hodgson C.	Crit Care Med. 2015 Mar;43(3):654-64. doi: 10.1097/CCM.0000000000000753.	2015	pubmed	N		59	Mixed	2			66		40	20.339	15	17.9	32.9	15	9.9	Royal Prince Alfred Hospital, Sydney, Australia	2007	2013	6	9.83333						Mixed	23				13	13								10
Mechanical ventilation management during extracorporeal membrane oxygenation for acute respiratory distress syndrome: a retrospective international multicenter study.	Schmidt M, Stewart C, Bailey M, Nieszkowska A, Kelly J, Murphy L, Pilcher D, Cooper DJ, Scheinkestel C, Pellegrino V, Forrest P, Combes A, Hodgson C.	Crit Care Med. 2015 Mar;43(3):654-64. doi: 10.1097/CCM.0000000000000753.	2015	pubmed	N		57	Mixed	4			61		46	54.386	10	21.9	31.9	20	11	Pitié-Salpètrière Hospital, Paris, France.	2011	2013	2	28.5						Mixed	14				14	14								0
Longterm support with a membrane lung.	Pois AJ, Katzman L, Weston CB, Mackman S, Gottlieb LI.	Chest. 1972 Dec;62(6):690-3. No abstract available.	1972	pubmed	Y	Less 50 patients
Prolonged venoarterial bypass with membrane pump oxygenator.	Choudhry KU, Howland WS, Goldiner PL, Ryan GM, Ray C, Bains M, Beattie EJ Jr.	N Y State J Med. 1972 Nov 15;72(22):2804-9. No abstract available.	1972	pubmed	Y	V-A ECMO
The membrane lung.	[No authors listed]	Med J Aust. 1972 Oct 21;2(17):915-6. No abstract available.	1972	pubmed	Y	Not available
[Preliminary results with the Bramson membrane lung. (Also report of a successful, clinical long-term perfusion)].	Schulte HD, Bircks W, Dudziak R.	Thoraxchir Vask Chir. 1972 Feb;20(1):54-9. German. No abstract available.	1972	pubmed	Y	Less 50 patients
[The use of a membrane oxygenator in respiratory assistance. II. Animal experiments and therapeutic trials of CO 2 removal in respiratory insufficiency].	Gille JP, Gautier P, Horsky P, Sadoul P.	Bull Physiopathol Respir (Nancy). 1972 Jan-Feb;8(1):29-48. French. No abstract available.	1972	pubmed	Y	Not english
Clinical membrane lung support for acute respiratory insufficiency.	Zapol W, Pontoppidan H, McCullough N, Schmidt V, Bland J, Kitz R.	Trans Am Soc Artif Intern Organs. 1972;18(0):553-60, 562. No abstract available.	1972	pubmed	Y	Less 18yr
Clinical use of the membrane lung.	Peirce EC 2nd.	Surg Annu. 1972;4:191-212. Review. No abstract available.	1972	pubmed	Y	Review / M-A
Prolonged extracorporeal oxygenation for acute post-traumatic respiratory failure (shock-lung syndrome). Use of the Bramson membrane lung.	Hill JD, O'Brien TG, Murray JJ, Dontigny L, Bramson ML, Osborn JJ, Gerbode F.	N Engl J Med. 1972 Mar 23;286(12):629-34	1972	Referenced	Y	Less 50 patients
Acute respiratory insufficiency. Treatment with prolonged extracorporeal oxygenation.	Hill JD, De Leval MR, Fallat RJ, Bramson ML, Eberhart RC, Schulte HD, Osborn JJ, Barber R, Gerbode F	J Thorac Cardiovasc Surg. 1972 Oct;64(4):551-62.	1972	Referenced	Y	Not available
Respiratory failure in influenza pneumonia. Treated with membrane oxygenator.	Spenny E, Gesundheit S, Gannon P, Lindberg E.	Minn Med. 1973 Dec;56(12):1017-20. No abstract available.	1973	pubmed	Y	Not available
Membrane lung support in acute respiratory insufficiency.	Joseph WL, Corso PJ, Geelhoed GW, Giordano JM, Adkins PC.	Med Ann Dist Columbia. 1973 Dec;42(12):599-601. No abstract available.	1973	pubmed	Y	Not available
[Partial perfusion with membrane oxygenators in the treatment of acute respiratory insufficiency].	Qvist J, Hansen DD, Pontoppidan H.	Ugeskr Laeger. 1973 Aug 20;135(34):1808-17. Review. Danish. No abstract available.	1973	pubmed	Y	Not english
[Membrane oxygenators in prolonged assisted extracorporeal circulation].	Schulte HD.	Dtsch Med Wochenschr. 1973 Mar 9;98(10):508-13. Review. German. No abstract available.	1973	pubmed	Y	Not english
Respiratory gas exchange with spiral coil membrane lungs: total cardiopulmonary bypass in adult sheep and clinical experience with long-term perfusion in adult patients.	McCullough NJ, Falke K, Lowenstein E, Buckley MJ, Schmidt V, Zapol WM.	Mt Sinai J Med. 1973 Mar-Apr;40(2):207-21. No abstract available.	1973	pubmed	Y	Less 50 patients
[Prolonged respiratory assistance with an artificial lung with membranes].	Awad JA, Brassard A, Martin L, Morin PJ.	Union Med Can. 1973 Mar;102(3):578-85. French. No abstract available.	1973	pubmed	Y	Not english
Clinical use of membrane lung. Discussion.	[No authors listed]	Mt Sinai J Med. 1973 Mar-Apr;40(2):237-48. No abstract available.	1973	pubmed	Y	Review / M-A
Clinical use of the membrane lung oxygenator for acute respiratory insufficiency.	Joseph WL, Giordano JM, Geelhoed GW.	Mt Sinai J Med. 1973 Mar-Apr;40(2):222-7. No abstract available.	1973	pubmed	Y	Less 50 patients
Long-term membrane oxygenation in respiratory failure.	Rea WJ, Eberle JW, Ecker RR, Watson J, Sugg WL.	Ann Thorac Surg. 1973 Feb;15(2):170-8. No abstract available.	1973	pubmed	Y	Review / M-A
[Long-term clinical use of membrane oxygenators].	Awad J, Dumont S, Guidion R.	Vie Med Can Fr. 1973 Jan;2(1):9-16. French. No abstract available.	1973	pubmed	Y	Not english
Treatment of acute respiratory failure with prolonged extracorporeal oxygenation.	Fallat RJ, Hill JD, Eberhart RC, Bramson ML, Tucker HJ, Ratliff JL.	Chest. 1974 Jul;66(1 Suppl):38S-40S. No abstract available.	1974	pubmed	Y	Less 50 patients
Acute respiratory insufficiency treated with extracorporeal oxygenation.	Liddle EB, Morre GH, Corley WE.	Rocky Mt Med J. 1974 Dec;71(12):691-3. No abstract available.	1974	pubmed	Y	Not available
Prolonged extracorporeal cardiopulmonary support in man.	Bartlett RH, Gazzaniga AB, Fong SW, Burns NE.	J Thorac Cardiovasc Surg. 1974 Dec;68(6):918-32. No abstract available.	1974	pubmed	Y	V-A ECMO
Prognostic factors in the treatment of acute respiratory insufficiency with long-term extracorporeal oxygenation.	Hill JD, Ratliff JL, Fallat RJ, Tucker HJ, Lamy M, Dietrich HP, Gerbode F.	J Thorac Cardiovasc Surg. 1974 Dec;68(6):905-17. No abstract available.	1974	pubmed	Y	Not available
The role of membrane lung support in transient acute respiratory insufficiency of Pneumocystis carinii pneumonia.	Geelhoed GW, Corso P, Joseph WL.	J Thorac Cardiovasc Surg. 1974 Nov;68(5):802-9. No abstract available.	1974	pubmed	Y	Not available
[Treatment of acute refractory respiratory failure using a membrane oxygenator. Cure of 2 cases].	Goulon M, Gajdos P, RaphÃ«l JC, Barois A, Nouailhat F, Grosbuis S, Babinet P, Dequirot A, Schortgen G.	Nouv Presse Med. 1974 Sep 7;3(29):1795-800. French. No abstract available.	1974	pubmed	Y	Less 50 patients
[Treatment of chronic respiratory insufficiency with a membrane-type pump oxygenator].	Kaku R, Esato K, Yamaki R.	Kyobu Geka. 1974 Jun;27(6):413-6. Japanese. No abstract available.	1974	pubmed	Y	Not english
Case history number 78: use of a membrane oxygenator in acute respiratory failure.	Kirby RR, Fontenelle LJ, Williams MJ, Fung DL.	Anesth Analg. 1974 May-Jun;53(3):469-73. No abstract available.	1974	pubmed	Y	Less 50 patients
[Experimental studies on the application of a membrane-type artificial lung (LandÃ©-Edwards type) in acute respiratory insufficiency].	Ezato K, Sumi R, Yashu R.	Nihon Kyobu Geka Gakkai Zasshi. 1974 May;22(5):536. Japanese. No abstract available.	1974	pubmed	Y	Not english
Heart surgery with a membrane oxygenator in infants.	Sugg WL, Fennig JS, Platt MR.	J Thorac Cardiovasc Surg. 1974 Apr;67(4):593-8. No abstract available.	1974	pubmed	Y	Less 18yr
Acute respiratory failure managed by prolonged partial extracorporeal oxygenation.	Chang VP, Harrison GA, Weston M, Hickie J, Benson R, Wright R, Shanahan MX, Windsor HM.	Med J Aust. 1974 Mar 9;1(10):350-5. No abstract available.	1974	pubmed	Y	Less 50 patients
Radionuclide imaging of the circulatory distribution of membrane lung perfusion.	Kanarek D, Zapol W, Ahluwalia B, Qvist J, Hales C, Liland A.	Trans Am Soc Artif Intern Organs. 1974;20A:262-8. No abstract available.	1974	pubmed	Y	Not available
Changes in coagulation and platelet function during prolonged extracorporeal circulation (ECC) in sheep and man.	Fong SW, Burns NE, Williams G, Woldanski C, Gazzaniga AB, Bartlett RH.	Trans Am Soc Artif Intern Organs. 1974;20A:239-47. No abstract available.	1974	pubmed	Y	Not available
[Extracorporeal circulation using a membrane artificial lung for respiratory assistance].	Gille JP, De Miguel E, Polu JM, Lambert H, Sadoul P.	Poumon Coeur. 1974;30(1):63-71. French. No abstract available.	1974	pubmed	Y	Not english
[Ultrastructural study of pulmonary lesions caused by a membrane oxygenator. Comparison with a similar case, which had not received the same treatment].	Pariente R, Sanchez A, Vai F, Cayrol E, Jardin F, Margairaz A.	Nouv Presse Med. 1975 Nov 29;4(41):2919-22. French.	1975	pubmed	Y	Less 50 patients
Platelets, hemostasis, and thromboembolism during treatment of acute respiratory insufficiency with extracorporeal membrane oxygenation.	Heiden D, Mielke CH Jr, Rodvien R, Hill JD.	J Thorac Cardiovasc Surg. 1975 Oct;70(4):644-55.	1975	pubmed	Y	Less 50 patients
Cannulation of the proximal aorta during long-term membrane lung perfusion.	McEnany MT, Zapol WM, Seebacher J, Skoskiewicz M, Schneider RC, Erdmann AJ, Snider MT, Kanarek DJ, Peck AG.	J Thorac Cardiovasc Surg. 1975 Oct;70(4):631-43.	1975	pubmed	Y	Less 50 patients
Clinical effects of membrane lung support for acute respiratory failure.	Geelhoed GW, Adkins PC, Corso PJ, Joseph WL.	Ann Thorac Surg. 1975 Aug;20(2):177-87.	1975	pubmed	Y	Less 50 patients
Clinical use of the membrane oxygenator.	Pyle RB, Helton WC, Johnson FW, Hornung JR, Hunt CE, Trumball HR, Lindsay WG, Nicoloff DM.	Arch Surg. 1975 Aug;110(8):966-70.	1975	pubmed	Y	Less 50 patients
Membrane lung perfusion for acute respiratory failure.	Zapol WM.	Surg Clin North Am. 1975 Jun;55(3):603-12. No abstract available.	1975	pubmed	Y	Review / M-A
Case records of the Massachusetts General Hospital. Weekly clinicopathological exercises. Case 21-1975.	[No authors listed]	N Engl J Med. 1975 May 29;292(22):1174-81. No abstract available.	1975	pubmed	Y	Less 50 patients
Complications associated with membrane lung support by venoarterial perfusion.	Ratliff JL, Hill JD, Fallat RJ, Parrot J, Tucker HJ.	Ann Thorac Surg. 1975 May;19(5):537-9.	1975	pubmed	Y	V-A ECMO
The changing pattern of post-traumatic respiratory distress syndrome.	Walker L, Eiseman B.	Ann Surg. 1975 May;181(5):693-7.	1975	pubmed	Y	No clinical data
Extracorporeal perfusion for acute respiratory failure: recent experience with the spiral coil membrane lung.	Zapol WM, Qvist J, Pontoppidan H, Liland A, McEnany T, Laver MB.	J Thorac Cardiovasc Surg. 1975 Mar;69(3):439-49.	1975	pubmed	Y	V-A ECMO
Effects of extracorporeal membrane oxygenation (ECMO) on pulmonary hemodynamics, gas exchange and prognose.	Lamy M, Eberhart RC, Fallat RJ, Dietrich HP, Ratliff J, Hill JD.	Trans Am Soc Artif Intern Organs. 1975;21:188-98.	1975	pubmed	Y	V-A ECMO
[Cardio-respiratory assistance with the extracorporeal membrane oxygenator for massive pulmonary embolism].	Jaspar N, Rocmans P, Ledant P, Degre S, Chailly P, Vanderhoeft P.	Acta Cardiol. 1975;30(1):35-48. French.	1975	pubmed	Y	V-A ECMO
Extracorporeal perfusion for acute respiratory failure: recent experience with the spiral coil membrane lung.	Zapol WM, Qvist J, Pontoppidan H, Liland A, McEnany T, Laver MB.	J Thorac Cardiovasc Surg. 1975 Mar;69(3):439-49.	1975	Referenced	Y	Duplicate
Oxygen transport during extracorporeal oxygenation for the treatment of adult respiratory distress syndrome.	Freund U, Carlson RW, Schaeffer RC Jr, Puri V, Weil MH.	Surg Gynecol Obstet. 1976 Nov;143(5):709-16.	1976	pubmed	Y	V-A ECMO
Pulmonary and extrapulmonary support for patients with Pneumocystis carinii pneumonia.	Geelhoed GW.	Natl Cancer Inst Monogr. 1976 Oct;43:187-91.	1976	pubmed	Y	Less 50 patients
Carbon monoxide accumulation during extracoporeal membrane oxygenation for acute respiratory failure.	Subramanian VA, Berger RL.	Ann Thorac Surg. 1976 Aug;22(2):195-8.	1976	pubmed	Y	Less 50 patients
Cardiorespiratory failure secondary to peripheral pulmonary emboli. Survival following a combination of prolonged extracorporeal membrane oxygenator support and pulmonary embolectomy.	Cooper JD, Teasdale S, Nelems JM, Glynn MF, MacGregor DC, Duffin J, Scott AA.	J Thorac Cardiovasc Surg. 1976 Jun;71(6):872-7.	1976	pubmed	Y	Less 50 patients
Combination of membrane oxygenator support and pulmonary lavage for acute respiratory failure.	Cooper JD, Duffin J, Glynn MF, Nelems JM, Teasdale S, Scott AA, Martin B.	J Thorac Cardiovasc Surg. 1976 Feb;71(2):304-8.	1976	pubmed	Y	Less 50 patients
Extracorporeal membrane oxygenation: new backup for fast-failing lungs.	Martz KV.	RN. 1976 Feb;39(2):ICU1-2, ICU4, ICU6. No abstract available.	1976	pubmed	Y	Review / M-A
[Prolonged extracorporeal membrane oxygenation in the treatment of burns-induced shock lung (authors transl)].	Rommelsheim K, Birtel FJ, Seidat KH, Brieden H, Nedjabat T, Paquet KJ.	Prakt Anaesth. 1976 Feb;11(1):8-16. German.	1976	pubmed	Y	Less 50 patients
Ten years of use of extracorporeal membrane oxygenation (ECMO) in the treatment of acute respiratory insufficiency (ARI).	Gille JP, Bagniewski AM.	Trans Am Soc Artif Intern Organs. 1976;22:102-9.	1976	Referenced	Y	Less 50 patients
Membrane oxygenation in pulmonary failure.	[No authors listed]	Lancet. 1977 Aug 20;2(8034):390. No abstract available.	1977	pubmed	Y	No clinical data
Adult respiratory distress syndrome (ARDS), sepsis, and extracorporeal membrane oxygenation (ECMO).	Browdie DA, Deane R, Shinozaki T, Morgan J, DeMeules JE, Coffin LH, Davis JH.	J Trauma. 1977 Aug;17(8):579-86.	1977	pubmed	Y	V-A ECMO
Extracorporeal membrane oxygenator support for cardiopulmonary failure. Experience in 28 cases.	Bartlett RH, Gazzaniga AB, Fong SW, Jefferies MR, Roohk HV, Haiduc N.	J Thorac Cardiovasc Surg. 1977 Mar;73(3):375-86.	1977	pubmed	Y	V-A ECMO
[Treatment of refractory acute respiratory insufficiency by extracorporeal circulation with the membrane oxygenator. II. Results obtained in 10 patients (author's transl)].	Raphael JC, Babinet P, Gajdos P, Goulon M.	Ann Chir Thorac Cardiovasc. 1977 Jan;16(1):23-6. French. No abstract available.	1977	pubmed	Y	Not english
Extracorporeal membrane oxygenation for acute respiratory failure.	Zapol WM, Snider MT, Schneider RC.	Anesthesiology. 1977 Apr;46(4):272-85.	1977	Referenced	Y	Review / M-A
Control of breathing using an extracorporeal membrane lung.	Kolobow T, Gattinoni L, Tomlinson TA, Pierce JE.	Anesthesiology. 1977 Feb;46(2):138-41.	1977	Referenced	Y	No clinical data
Membrane oxygenators for acute respiratory insufficiency. Clinical use in 11 patients.	Goulon M, Raphael JC, Gajdos P, Barois A, Babinet P, Margent P.	Intensive Care Med. 1978 Nov;4(4):173-9.	1978	pubmed	Y	V-A ECMO
Post-traumatic adult respiratory distress syndrome.	Amato JJ, Rheinlander HF, Cleveland RJ.	Orthop Clin North Am. 1978 Jul;9(3):693-713. No abstract available.	1978	pubmed	Y	Review / M-A
Scanning electron microscope study on flat type membrane oxygenator after prolonged extracorporeal circulation.	Guidoin R, Awad J, Domurado D, Morin PJ, Martin L, HÃ©bert G, Gille JP.	Res Exp Med (Berl). 1978 Jun 12;172(3):255-66.	1978	pubmed	Y	Less 50 patients
Eclampsia and pulmonary insufficiency.	Jewett JF.	N Engl J Med. 1978 May 4;298(18):1027-8. No abstract available.	1978	pubmed	Y	Less 50 patients
[Value of electroencephalographic surveillance during prolonged respiratory assistance with membrane oxygenators].	Raphael JC, Levy-Alcover M, Goulon M.	Anesth Analg (Paris). 1978 May-Jun;35(3):379-90. French. No abstract available.	1978	pubmed	Y	Not english
[Medical resuscitation in 1977].	Rapin M, Lemaire F, Bonnet JL.	Rev Prat. 1978 Mar 21;28(17):1237-58. Review. French. No abstract available.	1978	pubmed	Y	Not english
[Severe thoracic injuries and pulmonary insufficiency (application of a membrane-type artificial lung)].	Kaneko M, Suda Y, Kusajima K, Adachi H, Horie N.	Nihon Kyobu Geka Gakkai Zasshi. 1978 Mar;26(3):327-9. Japanese. No abstract available.	1978	pubmed	Y	Not english
Extracorporeal membrane oxygenation.	Brantigan CO, Grow JB Sr.	Rocky Mt Med J. 1978 Mar-Apr;75(2):97-103. No abstract available.	1978	pubmed	Y	Not available
Clinical extracorporeal membrane oxygenation for acute respiratory insufficiency.	Hill JD, Rodvien R, Snider MT, Bartlett RH.	Trans Am Soc Artif Intern Organs. 1978;24:753-63. No abstract available.	1978	pubmed	Y	Review / M-A
Symposium on intensive care: 4. Respiratory failure.	Cooper JD.	Can J Surg. 1978 Jan;21(1):84-7.	1978	pubmed	Y	Review / M-A
Control of intermittent positive pressure breathing (IPPB) by extracorporeal removal of carbon dioxide.	Gattinoni L, Kolobow T, Tomlinson T, White D, Pierce J.	Br J Anaesth. 1978 Aug;50(8):753-8.	1978	Referenced	Y	No clinical data
Extracorporeal membrane oxygenation in severe acute respiratory failure. A randomized prospective study.	Zapol WM, Snider MT, Hill JD, Fallat RJ, Bartlett RH, Edmunds LH, Morris AH, Peirce EC 2nd, Thomas AN, Proctor HJ, Drinker PA, Pratt PC, Bagniewski A, Miller RG Jr.	JAMA. 1979 Nov 16;242(20):2193-6.	1979	pubmed	Y	V-A ECMO
Pulmonary and systemic haemodynamic disorders in the adult respiratory distress syndrome.	Jardin F, Gurdjian F, Fouilladieu JL, Goudot B, Margairaz A.	Intensive Care Med. 1979 Sep;5(3):127-33. No abstract available.	1979	pubmed	Y	V-A ECMO
Extracorporeal membrane oxygenation (ECMO): a team approach in critical care and life-support research.	Wetmore NE, Bartlett RH, Gazzaniga AB, Haiduc NJ.	Heart Lung. 1979 Mar-Apr;8(2):288-95.	1979	pubmed	Y	Not available
Extracorporeal membrane oxygenation (ECMO): state of the rat in extrapulmonary respiration.	Geelhoed GW.	Heart Lung. 1979 Mar-Apr;8(2):277-9. No abstract available.	1979	pubmed	Y	No clinical data
Defining indications for artificial organ support in respiratory failure.	Wetmore N, McEwen D, O'Connor M, Bartlett RH.	Trans Am Soc Artif Intern Organs. 1979;25:459-61.	1979	pubmed	Y	No clinical data
Extracorporeal carbon dioxide removal (ECCO2R): a new form of respiratory assistance.	Gattinoni L, Kolobow T, Damia G, Agostoni A, Pesenti A	Int J Artif Organs. 1979 Jul;2(4):183-5.	1979	Referenced	Y	Not available
Treatment of acute respiratory failure with low-frequency positive-pressure ventilation and extracorporeal removal of CO2.	Gattinoni L, Agostoni A, Pesenti A, Pelizzola A, Rossi GP, Langer M, Vesconi S, Uziel L, Fox U, Longoni F, Kolobow T, Damia G.	Lancet. 1980 Aug 9;2(8189):292-4.	1980	pubmed	Y	Less 50 patients
Membrane lungs for acute respiratory failure: current status.	Zapol WM, Snider MT.	Am Rev Respir Dis. 1980 Jun;121(6):907-9. No abstract available.	1980	pubmed	Y	No clinical data
Low frequency positive pressure ventilation with extracorporeal CO2 removal (LEPPV-ECCO2R) in acute respiratory failure (ARF): technique.	Pesenti A, Pelizzola A, Mascheroni D, Uziel L, Pirovano E, Fox U, Gattinoni L, Kolobow T.	Trans Am Soc Artif Intern Organs. 1981;27:263-6.	1981	Referenced	Y	Less 50 patients
Pulmonary dysfunction associated with cardiopulmonary bypass: a comparison of bubble and membrane oxygenators.	Dancy CM, Townsend ER, Boylett A, Chan SL, Parker-Williams EJ, Parker DJ.	Circulation. 1981 Aug;64(2 Pt 2):II54-7.	1981	pubmed	Y	V-A ECMO
Veno-venous extra-corporeal membrane oxygenation.	Hopkinson R, Carnie J.	Anaesthesia. 1981 Jul;36(7):688-90.	1981	pubmed	Y	Less 50 patients
Adult respiratory distress syndrome (ARDS): why did ECMO fail?	Kolobow T, Solca M, Gattinoni L, Pesenti A.	Int J Artif Organs. 1981 Mar;4(2):58-9. No abstract available.	1981	pubmed	Y	No clinical data
[A case of prolonged extracorporeal membrane oxygenation--histological considerations on the indication (author's transl)].	Yamashiro K, Nogami T, Tsuno K, Ezaki K, Ohmori K, Tanoue T, Awata M, Matsuda T, Kano T, Terasaki H, Morioka T, Goto H.	Masui. 1981 Feb;30(2):200-5. Japanese. No abstract available.	1981	pubmed	Y	Less 50 patients
[Extracorporeal membrane oxygenation for severe acute respiratory failure].	Kobayashi K.	Rinsho Kyobu Geka. 1981;1(3):368-80. Japanese. No abstract available.	1981	pubmed	Y	Not english
[Extracorporeal membrane oxygenation in acute respiratory failure].	Karasev AB, Gasanov FD, PisarevskiÄ­ AA.	Anesteziol Reanimatol. 1981 Jan-Feb;(1):65-9. Review. Russian. No abstract available.	1981	pubmed	Y	Not english
Extracorpo- real membrane oxygenator support in a case of severe status asth- maticus.	MacDonnell KF, Moon HS, Sekar TS, Ahluwalia MP.	Ann Thorac Surg 1981;31(2):171-175.	1981	Referenced	Y	Less 50 patients
Reversal of terminal acute respiratory failure by low frequency positive pressure ventilation with extracorporeal removal of CO2 (LFPPV-ECCO2R).	Gattinoni L, Pesenti A, Pelizzola A, Caspani ML, Iapichino G, Agostoni A, Damia G, Kolobow T.	Trans Am Soc Artif Intern Organs. 1981;27:289-93.	1981	Referenced	Y	Not available
[Elaboration of new treatment methods in oxygen deficiency].	PriÄ­mak AA.	Probl Tuberk. 1982 Sep;(9):39-43. Russian. No abstract available.	1982	pubmed	Y	Not english
A brief review of the adult respiratory distress syndrome.	Hassan SN, Hackney RL Jr.	J Natl Med Assoc. 1982 Feb;74(2):165-9.	1982	pubmed	Y	Review / M-A
Hematologic survey during low frequency positive pressure ventilation with extracorporeal CO2 removal.	Uziel L, Agostoni A, Pirovano E, Sedini I, Pesenti A, Fox U, Gattinoni L, Kolobow T.	Trans Am Soc Artif Intern Organs. 1982;28:359-64.	1982	Referenced	Y	Less 18yr
Adult respiratory distress syndrome.	Boggis CR, Greene R.	Br J Hosp Med. 1983 Feb;29(2):167-74. No abstract available.	1983	pubmed	Y	Not available
A new look at therapy of the adult respiratory distress syndrome: motionless lungs.	Gattinoni L, Pesenti A, Kolobow T, Damia G.	Int Anesthesiol Clin. 1983 Summer;21(2):97-117. No abstract available.	1983	pubmed	Y	Review / M-A
[Pulmonary hypertension in severe adult respiratory distress syndrome].	Kobayashi K.	Kokyu To Junkan. 1984 Sep;32(9):907-12. Review. Japanese. No abstract available.	1984	pubmed	Y	Not english
Venovenous bypass with a membrane lung to support bilateral lung lavage.	Zapol WM, Wilson R, Hales C, Fish D, Castorena G, Hilgenberg A, Quinn D, Kradin R.	JAMA. 1984 Jun 22-29;251(24):3269-71.	1984	pubmed	Y	Less 50 patients
Extracorporeal oxygenation in neonates.	Bartlett RH.	Hosp Pract (Off Ed). 1984 Apr;19(4):139-43, 146, 151. No abstract available.	1984	pubmed	Y	Less 18yr
Long-term follow-up of infants and children treated with extracorporeal membrane oxygenation (ECMO): a preliminary report.	Towne BH, Lott IT, Hicks DA, Healey T.	J Pediatr Surg. 1985 Aug;20(4):410-4.	1985	pubmed	Y	Less 18yr
[Extracorporeal membrane oxygenation and hemosorption in the combined therapy of shock lung].	Voinov VA, Estrin VV, Orlov VI, Zelikson BM, Basin BIa.	Anesteziol Reanimatol. 1985 Jul-Aug;(4):37-9. Russian. No abstract available.	1985	pubmed	Y	Not english
Granulocyte aggregation in adult respiratory distress syndrome (ARDS)--serial histologic and physiologic observations.	Elliott CG, Zimmerman GA, Orme JF Jr, Morris AH, Mortensen JD.	Am J Med Sci. 1985 Feb;289(2):70-4.	1985	pubmed	Y	Less 50 patients
Tracheal and alveolar gas composition during low-frequency positive pressure ventilation with extracorporeal CO2-removal (LFPPV-ECCO2R).	Peters J, Radermacher P, Pesenti A, Schulte HD, Falke KJ.	Intensive Care Med. 1985;11(4):213-7.	1985	pubmed	Y	Less 18yr
[Long-term extracorporeal membrane oxygenation in children with acute respiratory insufficiency].	Borodachev AV, Mikhel'son VA, Gorbachev OS, Lekarev AA.	Anesteziol Reanimatol. 1985 Jan-Feb;(1):62-5. Review. Russian. No abstract available.	1985	pubmed	Y	Not english
Total respiratory support with single cannula venovenous ECMO: double lumen continuous flow vs. single lumen tidal flow.	Zwischenberger JB, Toomasian JM, Drake K, Andrews AF, Kolobow T, Bartlett RH.	Trans Am Soc Artif Intern Organs. 1985;31:610-5.	1985	Referenced	Y	No clinical data
[Blood coagulation problems during long-term extracorporeal circulation].	Agostoni A, Uziel L, Cugno MM, Cacciabue E.	Ann Ital Med Int. 1986 Sep;1(3):212-20. Italian. No abstract available.	1986	pubmed	Y	Not english
Simultaneous use of membrane oxygenation and high-frequency jet ventilation in acute pulmonary failure.	Girotti MJ, Pym J, Todesco J, Wigle RD, Munt PW.	Crit Care Med. 1986 May;14(5):511-3.	1986	pubmed	Y	Less 18yr
Management of severe ARDS with low frequency positive pressure ventilation and extracorporeal CO2 removal.	Hickling KG, Downward G, Davis FM, A'Court G.	Anaesth Intensive Care. 1986 Feb;14(1):79-83. No abstract available.	1986	pubmed	Y	Less 50 patients
Low-frequency positive-pressure ventilation with extracorporeal CO2 removal in severe acute respiratory failure.	Gattinoni L, Pesenti A, Mascheroni D, Marcolin R, Fumagalli R, Rossi F, Iapichino G, Romagnoli G, Uziel L, Agostoni A	JAMA. 1986 Aug 15;256(7):881-6.	1986	Referenced	Y	Less 18yr
Extracorporeal membrane oxygenation for acute respiratory failure.	Bone RC.	JAMA. 1986 Aug 15;256(7):910.	1986	Referenced	Y	No clinical data
Ventilatory impact of partial extracorporeal CO2 removal (PECOR) in ARF patients.	Marcolin R, Mascheroni D, Pesenti A, Bombino M, Gattinoni L.	ASAIO Trans. 1986 Jul-Sep;32(1):508-10	1986	Referenced	Y	Less 18yr
[Surgical treatment of massive pulmonary embolism--an experience of using ECMO in cardiopulmonary failure].	Nakao M, Haruna H, Okamura M, Higami T, Asada T, Yamomoto S, Tsuruta H, Ogawa K.	Kyobu Geka. 1987 Aug;40(9):721-5. Japanese. No abstract available.	1987	pubmed	Y	Less 50 patients
Prolonged extracorporeal CO2-removal in severe adult respiratory distress syndrome. Neuropathological observations in two cases.	Krajewski S, Seitz RJ, Schober R, Breulmann M, Falke KJ.	Intensive Care Med. 1987;13(1):26-9.	1987	pubmed	Y	Less 50 patients
Treatment of acute respiratory failure by extracorporeal carbon dioxide elimination performed with a surface heparinized artificial lung.	Bindslev L, Eklund J, Norlander O, Swedenborg J, Olsson P, Nilsson E, Larm O, Gouda I, Malmberg A, Scholander E.	Anesthesiology. 1987 Jul;67(1):117-20	1987	Referenced	Y	Not available
Extracorporeal lung assist without endotracheal intubation and mechanical pulmonary ventilation.	Terasaki H, Nogami T, Saito Y, Otsu T, Morioka T.	Crit Care Med. 1987 Jan;15(1):84-5.	1987	Referenced	Y	Less 50 patients
Ten-year experience with extracorporeal membrane oxygenation for severe respiratory failure.	Egan TM, Duffin J, Glynn MF, Todd TR, DeMajo W, Murphy E, Fox L, Cooper JD.	Chest. 1988 Oct;94(4):681-7.	1988	pubmed	Y	Less 50 patients
Venovenous perfusion of adults and children with severe acute respiratory distress syndrome. The Pennsylvania State University experience from 1982-1987.	Snider MT, Campbell DB, Kofke WA, High KM, Russell GB, Keamy MF, Williams DR.	ASAIO Trans. 1988 Oct-Dec;34(4):1014-20. No abstract available.	1988	pubmed	Y	Less 50 patients
Adult ECMO performed with surface-heparinized equipment.	Bindslev L.	ASAIO Trans. 1988 Oct-Dec;34(4):1009-13.	1988	pubmed	Y	Less 50 patients
Extracorporeal membrane oxygenation support in cardiorespiratory failure.	Hirschl RB, Bartlett RH.	Adv Surg. 1988;21:189-211. Review. No abstract available.	1988	pubmed	Y	Review / M-A
Extracorporeal CO2-removal with a heparin coated artificial lung.	Peters J, Radermacher P, Kuntz ME, Rosenbauer KA, Breulmann M, BÃ¼rrig KF, Hopf HB, Rossaint R, Schulte HD, Olsson P, et al.	Intensive Care Med. 1988;14(5):578-84.	1988	pubmed	Y	Less 50 patients
A controlled clinical trial of a new 3-step therapy that includes extracorporeal CO2 removal for ARDS.	Morris AH1, Menlove RL, Rollins RJ, Wallace CJ, Beck E.	ASAIO Trans. 1988 Jan-Mar;34(1):48-53.	1988	Referenced	Y	No Complications Reported
Evaluation of Duraflo II heparin coating in prolonged extracorporeal membrane oxygenation.	Toomasian JM1, Hsu LC, Hirschl RB, Heiss KF, Hultquist KA, Bartlett RH	ASAIO Trans. 1988 Jul-Sep;34(3):410-4.	1988	Referenced	Y	No clinical data
[Acute respiratory distress syndrome of the adult (ARDS) and artificial respiration--results in surgical intensive care patients].	Deller A, Konrad F, Spilker D, Kilian J.	Anasth Intensivther Notfallmed. 1989 Oct;24(5):277-82. German.	1989	pubmed	Y	Not english
[Present status and future observation of membrane oxygenator].	Teramoto S.	Kyobu Geka. 1989 Jul;42(8 Suppl):665-9. Review. Japanese.	1989	pubmed	Y	Review / M-A
[Adult respiratory distress syndrome in legionella pneumonia--successful treatment with extracorporeal CO2 elimination procedures].	MÃ¼ller E, Knoch M, HÃ¶ltermann W, Lennartz H.	Anasth Intensivther Notfallmed. 1989 Jun;24(3):177-80. German.	1989	pubmed	Y	Less 50 patients
[A case of acute airway obstruction with sharp sawdust particles, successfully treated by extracorporeal lung assist].	Higashi K, Takeshita J, Terasaki H, Tanoue T, Esaki K, Sakamoto M, Tsutsumi R, Kishi H, Yano T, Ootsu T, et al.	Kokyu To Junkan. 1989 Mar;37(3):329-33. Japanese.	1989	pubmed	Y	Less 50 patients
Hemolysis during long-term extracorporeal membrane oxygenation.	Steinhorn RH1, Isham-Schopf B, Smith C, Green TP	J Pediatr. 1989 Oct;115(4):625-30	1989	Referenced	Y	Less 18yr
Extracorporeal gas exchange in adult respiratory distress syndrome: associated morbidity and its surgical treatment.	Wagner PK, Knoch M, Sangmeister C, MÃ¼ller E, Lennartz H, Rothmund M.	Br J Surg. 1990 Dec;77(12):1395-8.	1990	pubmed	Y	Less 50 patients
Extracorporeal life support for cardiopulmonary failure.	Bartlett RH.	Curr Probl Surg. 1990 Oct;27(10):621-705. Review. No abstract available.	1990	pubmed	Y	Review / M-A
Predictors of mortality in children with respiratory failure: possible indications for ECMO.	Rivera RA, Butt W, Shann F.	Anaesth Intensive Care. 1990 Aug;18(3):385-9.	1990	pubmed	Y	No clinical data
Respiratory failure due to choriocarcinoma: a study of 103 dyspneic patients.	Kelly MP, Rustin GJ, Ivory C, Phillips P, Bagshawe KD.	Gynecol Oncol. 1990 Aug;38(2):149-54.	1990	pubmed	Y	No clinical data
Ventilatory management casebook. Congenital diaphragmatic hernia meeting criteria for extracorporeal membrane oxygenation.	Adolph V, Arensman RM, Falterman KW, Goldsmith JP.	J Perinatol. 1990 Jun;10(2):202-5.	1990	pubmed	Y	Less 18yr
Extracorporeal membrane oxygenation for pediatric cardiopulmonary failure.	Anderson HL 3rd, Attorri RJ, Custer JR, Chapman RA, Bartlett RH.	J Thorac Cardiovasc Surg. 1990 Jun;99(6):1011-9; discussion 1019-21.	1990	pubmed	Y	Not available
Approach for oxygenation of the newborn with airway obstruction due to a cervical mass.	Kelly MF, Berenholz L, Rizzo KA, Greco R, Wolfson P, Zwillenberg DA.	Ann Otol Rhinol Laryngol. 1990 Mar;99(3 Pt 1):179-82.	1990	pubmed	Y	Less 18yr
Low-frequency positive-pressure ventilation with extracorporeal carbon dioxide removal.	Abrams JH, Gilmour IJ, Kriett JM, Bitterman PB, Irmiter RJ, McComb RC, Cerra FB.	Crit Care Med. 1990 Feb;18(2):218-20.	1990	pubmed	Y	Less 50 patients
The management of adult respiratory distress syndrome: 2.	Keogh BF, Hunter DN, Morgan CJ, Evans TW.	Br J Hosp Med. 1990 Jan;43(1):26-30, 32-4 passim. Review.	1990	pubmed	Y	Review / M-A
[Extracorporeal membrane oxygenation and CO2 elimination].	Lennartz H, Wagner P.	Langenbecks Arch Chir Suppl II Verh Dtsch Ges Chir. 1990:1113-9. German.	1990	pubmed	Y	Not english
Physiopathology and management of coagulation during long-term extracorporeal respiratory assistance.	Uziel L1, Cugno M, Fabrizi I, Pesenti A, Gattinoni L, Agostoni A.	Int J Artif Organs. 1990 May;13(5):280-7.	1990	Referenced	Y	Not available
Blood use during extracorporeal membrane oxygenation	McCoy-Pardington D1, Judd WJ, Knafl P, Abruzzo LV, Coombes KR, Butch SH, Oberman HA.	Transfusion. 1990 May;30(4):307-9.	1990	Referenced	Y	Less 18yr
Single-cannula venovenous bypass for respiratory membrane lung support.	Durandy Y1, Chevalier JY, Lecompte Y.	J Thorac Cardiovasc Surg. 1990 Mar;99(3):404-9.	1990	Referenced	Y	No clinical data
Improved cannulation method for extracorporeal membrane oxygenation.	Read R1, St Cyr J, Tornabene S, Whitman G.	Ann Thorac Surg. 1990 Oct;50(4):670-1.	1990	Referenced	Y	Less 18yr
Extracorporeal CO2-removal with a heparin coated extracorporeal system.	Rossaint R, Slama K, Bauer R, Nienhaus M, Barth H, Weidemann H, Falke KJ.	Intensive Care Med. 1990;16(5):344-5.	1990	Referenced	Y	Less 50 patients
Extracorporeal carbon dioxide removal performed with surface-heparinized equipment in patients with ARDS.	Bindslev L, BÃ¶hm C, Jolin A, Hambraeus Jonzon K, Olsson P, Ryniak S.	Acta Anaesthesiol Scand Suppl. 1991;95:125-30; discussion 130-1.	1991	pubmed	Y	Less 50 patients
The prognostic value of extracellular matrix component concentrations in serum during treatment of adult respiratory distress syndrome with extracorporeal CO2 removal.	Kropf J, Grobe E, Knoch M, Lammers M, Gressner AM, Lennartz H.	Eur J Clin Chem Clin Biochem. 1991 Dec;29(12):805-12.	1991	pubmed	Y	No Complications Reported
Extracorporeal membrane oxygenation (ECMO): extended indications for artificial support of both heart and lungs.	Jurmann MJ, Haverich A, Demertzis S, Schaefers HJ, Zahner HH, Endrigkeit KD, Wahlers T, Cremer J, Borst HG.	Int J Artif Organs. 1991 Dec;14(12):771-4.	1991	pubmed	Y	V-A ECMO
Life-saving use of extracorporeal membrane gas exchange in severe, acute respiratory failure.	Fisher AP, Jayawardene B, Ramstead KD, Fisher AR.	Anaesthesia. 1991 Oct;46(10):866-8.	1991	pubmed	Y	Less 50 patients
Extracorporeal membrane oxygenation: a breath of fresh air or yesterday's treatment?	Evans TW, Keogh BF.	Thorax. 1991 Oct;46(10):692-4. No abstract available.	1991	pubmed	Y	Review / M-A
Experience and directions using cardiopulmonary support in fifty-three consecutive cases.	Moore CH, Rubin JM, Schnitzler RN, Canon DS, Arpin D.	ASAIO Trans. 1991 Jul-Sep;37(3):M340-2.	1991	pubmed	Y	Less 50 patients
[Extracorporeal membrane oxygenation. A therapeutic alternative in acute heart and/or pulmonary failure?].	Bjertnaes LJ, Olafsen K, Nilsen PA, BrÃ¸ndbo A, Thoner J, Vaage J, SolbÃ¸ J, Hansen K, Jolin A.	Tidsskr Nor Laegeforen. 1991 May 10;111(12):1477-80. Norwegian.	1991	pubmed	Y	Less 50 patients
Increased survival of ARDS patients with severe hypoxemia (ECMO criteria).	Suchyta MR, Clemmer TP, Orme JF Jr, Morris AH, Elliott CG.	Chest. 1991 Apr;99(4):951-5.	1991	pubmed	Y	No Complications Reported
[ECMO treatment for ARDS].	Onuki T, Nitta S, Kaneyasu H, Murasugi M, Kei J, Itaoka T, Yokoyama M.	Nihon Kyobu Shikkan Gakkai Zasshi. 1991 Feb;29(2):165-9. Japanese.	1991	pubmed	Y	Less 50 patients
Extracorporeal respiratory gas exchange: a look into the future.	Kolobow T.	ASAIO Trans. 1991 Jan-Mar;37(1):2-3. No abstract available.	1991	pubmed	Y	No clinical data
Total extracorporeal lung assist--a new clinical approach.	Wetterberg T, Steen S.	Intensive Care Med. 1991;17(2):73-7.	1991	pubmed	Y	Less 50 patients
A nordic ECMO saga or whither ECMO?	Zapol WM.	Intensive Care Med. 1991;17(2):69-70. No abstract available.	1991	pubmed	Y	Less 50 patients
[The initial experience of using isolated ultrafiltration of the blood for the correction of severe respiratory failure in hemoblastosis patients].	Fedanov AV, GorodetskiÄ­ VM, Biriukova LS, Galstian GM.	Ter Arkh. 1991;63(12):80-3. Russian.	1991	pubmed	Y	Not english
Veno-venous extracorporeal membrane oxygenation with a heparin-coated system in adult respiratory distress syndrome.	Koul B, Wetterberg T, Ohqvist G, Olsson P.	Scand J Thorac Cardiovasc Surg. 1991;25(3):199-206.	1991	pubmed	Y	Less 50 patients
[Extracorporeal treatments of respiratory failure].	Ruokonen E.	Duodecim. 1991;107(4):239-41. Review. Finnish. No abstract available.	1991	pubmed	Y	Review / M-A
Increased survival of ARDS patients with severe hypoxemia (ECMO criteria).	Suchyta MR1, Clemmer TP, Orme JF Jr, Morris AH, Elliott CG.	Chest. 1991 Apr;99(4):951-5.	1991	Referenced	Y	Duplicate
Extracorporeal lung assist with heparin-coated systems.	Rossaint R, Slama K, Lewandowski K, Streich R, Henin P, Hopfe T, Barth H, Nienhaus M, Weidemann H, Lemmens P, et al.	Int J Artif Organs. 1992 Jan;15(1):29-34.	1992	pubmed	Y	Less 50 patients
Progress in veno-venous long-term bypass techniques for the treatment of ARDS. Controlled clinical trial with the heparin-coated bypass circuit.	Knoch M, KÃ¶llen B, Dietrich G, MÃ¼ller E, Mottaghy K, Lennartz H.	Int J Artif Organs. 1992 Feb;15(2):103-8.	1992	pubmed	Y	Less 50 patients
Progress in veno-venous long-term bypass techniques for the treatment of ARDS. Controlled clinical trial with the heparin-coated bypass circuit.	Knoch M, KÃ¶llen B, Dietrich G, MÃ¼ller E, Mottaghy K, Lennartz H.	Int J Artif Organs. 1992 Feb;15(2):103-8.	1992	pubmed	Y	Less 50 patients
Progress in veno-venous long-term bypass techniques for the treatment of ARDS. Controlled clinical trial with the heparin-coated bypass circuit.	Knoch M, KÃ¶llen B, Dietrich G, MÃ¼ller E, Mottaghy K, Lennartz H.	Int J Artif Organs. 1992 Feb;15(2):103-8.	1992	pubmed	Y	Less 50 patients
[Pulmonary function one year after extracorporeal lung assist. A long-term follow-up of patients with acute adult respiratory distress syndrome].	Knoch M, Kukule I, MÃ¼ller E, HÃ¶ltermann W.	Anasthesiol Intensivmed Notfallmed Schmerzther. 1992 Dec;27(8):477-82. German.	1992	pubmed	Y	Not english
Clinical trials of an intravenous oxygenator in patients with adult respiratory distress syndrome.	High KM, Snider MT, Richard R, Russell GB, Stene JK, Campbell DB, Aufiero TX, Thieme GA.	Anesthesiology. 1992 Nov;77(5):856-63.	1992	pubmed	Y	No clinical data
Acute respiratory failure and ECMO.	Dirkes S, Dickinson S, Valentine J.	Crit Care Nurse. 1992 Oct;12(7):39-47.	1992	pubmed	Y	Not available
Prolonged extracorporeal support for ARDS using surface-heparinized equipment.	Willms D, Dembitsky W.	Chest. 1992 Sep;102(3):968-70.	1992	pubmed	Y	Less 50 patients
Miliary tuberculosis with acute respiratory failure and histiocytic hemophagocytosis. Successful treatment with extracorporeal lung support and epipodophyllotoxin VP 16-213.	Monier B, Fauroux B, Chevalier JY, Leverger G, Nathanson M, Costil J, Tournier G.	Acta Paediatr. 1992 Sep;81(9):725-7.	1992	pubmed	Y	Less 18yr
When is lung transplantation appropriate?	Egan TM.	J Heart Lung Transplant. 1992 Sep-Oct;11(5):1008. No abstract available.	1992	pubmed	Y	No clinical data
Successful lung transplantation for posttraumatic adult respiratory distress syndrome after extracorporeal membrane oxygenation support.	Demertzis S, Haverich A, Ziemer G, Nerlich M, MÃ¼ller KM, Wagner TO, Borst HG.	J Heart Lung Transplant. 1992 Sep-Oct;11(5):1005-7.	1992	pubmed	Y	Less 50 patients
Prolonged extracorporeal support for nonneonatal respiratory failure.	Weber TR, Tracy TF Jr, Connors R, Kountzman B, Pennington DG.	J Pediatr Surg. 1992 Aug;27(8):1100-4; discussion 1104-5.	1992	pubmed	Y	Less 18yr
Experience with extracorporeal membrane oxygenation in children more than one month old.	Butt W, Karl T, Horton A, Shann F, Mullaly R.	Anaesth Intensive Care. 1992 Aug;20(3):308-10.	1992	pubmed	Y	Less 18yr
[Acute respiratory failure--support of gas exchange using extracorporeal or implanted oxygenators--present status and future development].	MÃ¼ller E, Kolobow T, Knoch M, HÃ¶ltermann W.	Anasthesiol Intensivmed Notfallmed Schmerzther. 1992 Aug;27(5):259-73. Review. German.	1992	pubmed	Y	Review / M-A
Intravascular membrane oxygenation and carbon dioxide removal--a new application for permissive hypercapnia?	Zwischenberger JB, Cox CS, Graves D, Bidani A.	Thorac Cardiovasc Surg. 1992 Jun;40(3):115-20. Review.	1992	pubmed	Y	No clinical data
Extracorporeal membrane oxygenation revisited, revisited.	Bartlett RH, Anderson HL 3rd.	Ann Thorac Surg. 1992 Apr;53(4):738-9. No abstract available.	1992	pubmed	Y	Review / M-A
Early experience with adult extracorporeal membrane oxygenation in the modern era.	Anderson HL 3rd, Delius RE, Sinard JM, McCurry KR, Shanley CJ, Chapman RA, Shapiro MB, Rodriguez JL, Bartlett RH.	Ann Thorac Surg. 1992 Apr;53(4):553-63.	1992	pubmed	Y	V-A ECMO
Intravascular oxygenation for advanced respiratory failure.	Jurmann MJ, Demertzis S, Schaefers HJ, Wahlers T, Haverich A.	ASAIO J. 1992 Apr-Jun;38(2):120-4.	1992	pubmed	Y	No clinical data
Major thoracic surgery during long-term extracorporeal lung assist for treatment of severe adult respiratory distress syndrome (ARDS).	Rossaint R, Slama K, Lewandowski K, Frey DJ, Weidemann H, Fuchs J, Nienhaus M, Henin P, Falke K.	Eur J Cardiothorac Surg. 1992;6(1):43-5.	1992	pubmed	Y	Less 50 patients
Effects of aprotinin on hemorrhagic complications in ARDS patients during prolonged extracorporeal CO2 removal.	Brunet F, Mira JP, Belghith M, Lanore JJ, Schlumberger S, Toulon P, Dhainaut JF.	Intensive Care Med. 1992;18(6):364-7.	1992	pubmed	Y	Less 50 patients
Prolonged extracorporeal circulation without heparin. Evaluation of the Medtronic Minimax oxygenator.	Shanley CJ1, Hultquist KA, Rosenberg DM, McKenzie JM, Shah NL, Bartlett RH.	ASAIO J. 1992 Jul-Sep;38(3):M311-6.	1992	Referenced	Y	No clinical data
Extracorporeal carbon dioxide removal and low-frequency positive-pressure ventilation. Improvement in arterial oxygenation with reduction of risk of pulmonary barotrauma in patients with adult respiratory distress syndrome.	Brunet F, Belghith M, Mira JP, Lanore JJ, Vaxelaire JF, Dall'ava Santucci J, Dhainaut JF.	Chest. 1993 Sep;104(3):889-98.	1993	pubmed	Y	Less 50 patients
Extracorporeal life support for adult cardiorespiratory failure.	Anderson H 3rd, Steimle C, Shapiro M, Delius R, Chapman R, Hirschl R, Bartlett R.	Surgery. 1993 Aug;114(2):161-72; discussion 172-3.	1993	pubmed	Y	Less 50 patients
Implementing practice guidelines through clinical quality improvement.	James BC.	Front Health Serv Manage. 1993 Fall;10(1):3-37; discussion 54-6. Review.	1993	pubmed	Y	Review / M-A
[Post-traumatic ARDS--a potential indication for lung transplantation?].	Demertzis S, Haverich A.	Unfallchirurg. 1993 Dec;96(12):615-7. German.	1993	pubmed	Y	Less 50 patients
Science reporters hear wide range of recent data at 12th annual conference.	Skolnick AA, Manack L.	JAMA. 1993 Nov 24;270(20):2413-9. No abstract available.	1993	pubmed	Y	Review / M-A
Supporting the injured lung.	Sim KM, Evans TW.	BMJ. 1993 Nov 20;307(6915):1293-4. No abstract available.	1993	pubmed	Y	Review / M-A
Extracorporeal circulation for respiratory support in adults.	Brunet F, Dhainaut JF.	Respir Med. 1993 Nov;87(8):565-8. No abstract available.	1993	pubmed	Y	Review / M-A
Role of extracorporeal circulation in adult respiratory distress syndrome management.	Gattinoni L, Pesenti A, Bombino M, Pelosi P, Brazzi L.	New Horiz. 1993 Nov;1(4):603-12. Review.	1993	pubmed	Y	Review / M-A
Extracorporeal life support for pediatric respiratory failure: predictors of survival from 220 patients.	Moler FW, Palmisano J, Custer JR.	Crit Care Med. 1993 Oct;21(10):1604-11.	1993	pubmed	Y	Less 18yr
Extracorporeal circulatory support in children in intensive care.	Butt W, Beca J.	Crit Care Med. 1993 Sep;21(9 Suppl):S381-2. No abstract available.	1993	pubmed	Y	Less 18yr
Extracorporeal membrane oxygenation service at Egleston: two years' experience.	Cornish JD, Clark RH, Ricketts RR, Dykes FD, Wright JA, Kesser K, Heard MS.	J Med Assoc Ga. 1993 Sep;82(9):471-6.	1993	pubmed	Y	Not available
Beyond autonomy--physicians' refusal to use life-prolonging extracorporeal membrane oxygenation.	Paris JJ, Schreiber MD, Statter M, Arensman R, Siegler M.	N Engl J Med. 1993 Jul 29;329(5):354-7. No abstract available.	1993	pubmed	Y	Less 18yr
[Acute respiratory failure in tropical malaria during pregnancy. Successful treatment using extracorporeal CO2 elimination].	Neurath M, Benzing A, Knolle P, Grundmann H, Dippold W, Meyer zum BÃ¼schenfelde KH.	Dtsch Med Wochenschr. 1993 Jul 23;118(29-30):1060-6. German.	1993	pubmed	Y	Less 50 patients
Rescue from pediatric ECMO with prolonged hybrid intratracheal pulmonary ventilation. A technique for reducing dead space ventilation and preventing ventilator induced lung injury.	Raszynski A, Hultquist KA, Latif H, Sussmane J, Soler M, Alam A, Brao J, Amor J, Kilheeney D, Kolobow T, et al.	ASAIO J. 1993 Jul-Sep;39(3):M681-5.	1993	pubmed	Y	Less 18yr
Extracorporeal membrane oxygenation after lung or heart-lung transplantation.	Slaughter MS, Nielsen K, Bolman RM 3rd.	ASAIO J. 1993 Jul-Sep;39(3):M453-6.	1993	pubmed	Y	Less 50 patients
Emergency lung transplantation after extracorporeal membrane oxygenation.	Jurmann MJ, Schaefers HJ, Demertzis S, Haverich A, Wahlers T, Borst HG.	ASAIO J. 1993 Jul-Sep;39(3):M448-52.	1993	pubmed	Y	Less 50 patients
Radiologic evaluation of the intravenous oxygenator.	Shukla PR, Snider MT, Hopper KD, Thieme GA, Meilstrup JW.	Radiology. 1993 Jun;187(3):783-6.	1993	pubmed	Y	No clinical data
[Nursing aspects in the treatment of patients with adult respiratory distress syndrome].	Kreipel G.	Krankenpfl J. 1993 May;31(5):184-9. German. No abstract available.	1993	pubmed	Y	No clinical data
Extracorporeal membrane oxygenation: support for overwhelming pulmonary failure in the pediatric population. Collective experience from the extracorporeal life support organization.	O'Rourke PP, Stolar CJ, Zwischenberger JB, Snedecor SM, Bartlett RH.	J Pediatr Surg. 1993 Apr;28(4):523-8; discussion 528-9.	1993	pubmed	Y	Less 18yr
[Hemodynamic improvement during therapy using the intravascular oxygenator (IVOX)].	Vonwiller HM, von Segesser L, Schaffner A, Speich R, Stocker R, Baumann PC.	Schweiz Med Wochenschr. 1993 Mar 20;123(11):497-502. German.	1993	pubmed	Y	No clinical data
Extracorporeal lung support: an advance in treatment of severe lung disease.	Barnes NA, Havill JH, Cooper L, Armistead SH, Ulyatt DS.	N Z Med J. 1993 Feb 10;106(949):33-4. No abstract available.	1993	pubmed	Y	Not available
Use of extracorporeal membrane oxygenation for adult respiratory distress syndrome following cadaveric renal transplantation.	Greenfield DT, Posner MP, Lofland GK, Wechsler AS.	Transplantation. 1993 Feb;55(2):447-8. No abstract available.	1993	pubmed	Y	Less 50 patients
Early results of intravascular oxygenation.	Kallis P, al-Saady NM, Bennett ED, Treasure T.	Eur J Cardiothorac Surg. 1993;7(4):206-10.	1993	pubmed	Y	No clinical data
Prolonged total extracorporeal lung assistance without systemic heparinization.	Fjalldal O, Torfason B, Onundarson PT, Thorsteinsson A, VigfÃºsson G, StefÃ¡nsson T, MagnÃºsson V.	Acta Anaesthesiol Scand. 1993 Jan;37(1):115-20.	1993	pubmed	Y	Less 18yr
Prolonged intracorporeal support of gas exchange with an intravenacaval oxygenator.	Conrad SA, Eggerstedt JM, Morris VF, Romero MD.	Chest. 1993 Jan;103(1):158-61.	1993	pubmed	Y	No clinical data
Trouble shooting the extracorporeal membrane oxygenator circuit and patient.	Faulkner SC1, Chipman CW, Baker LL	J Extra Corpor Technol. 1993;24(4):120-9.	1993	Referenced	Y	Not available
Extracorporeal life support for status asthmaticus.	Shapiro MB1, Kleaveland AC, Bartlett RH.	Chest. 1993 Jun;103(6):1651-4.	1993	Referenced	Y	Less 50 patients
Pulmonary changes following extracorporeal membrane oxygenation: autopsy study of 23 cases.	Chou P1, Blei ED, Shen-Schwarz S, Gonzalez-Crussi F, Reynolds M	Hum Pathol. 1993 Apr;24(4):405-12.	1993	Referenced	Y	Less 18yr
Efficacy of extracorporeal life support in the setting of adult cardiorespiratory failure.	Pranikoff T, Hirschl RB, Steimle CN, Anderson HL 3rd, Bartlett RH.	ASAIO J. 1994 Jul-Sep;40(3):M339-43.	1994	pubmed	Y	V-A ECMO
Randomized clinical trial of pressure-controlled inverse ratio ventilation and extracorporeal CO2 removal for adult respiratory distress syndrome.	Morris AH, Wallace CJ, Menlove RL, Clemmer TP, Orme JF Jr, Weaver LK, Dean NC, Thomas F, East TD, Pace NL, Suchyta MR, Beck E, Bombino M, Sittig DF, BÃ¶hm S, Hoffmann B, Becks H, Butler S, Pearl J, Rasmusson B.	Am J Respir Crit Care Med. 1994 Feb;149(2 Pt 1):295-305. Erratum in: Am J Respir Crit Care Med 1994 Mar;149(3 Pt 1):838.	1994	pubmed	Y	Less 50 patients
Extracorporeal carbon dioxide removal technique improves oxygenation without causing overinflation.	Brunet F, Mira JP, Belghith M, Monchi M, Renaud B, Fierobe L, Hamy I, Dhainaut JF, Dall'ava-Santucci J.	Am J Respir Crit Care Med. 1994 Jun;149(6):1557-62.	1994	pubmed	Y	Less 50 patients
Intravascular membrane oxygenation and carbon dioxide removal with IVOX: can improved design and permissive hypercapnia achieve adequate respiratory support during severe respiratory failure?	Zwischenberger JB, Cardenas VJ Jr, Tao W, Niranjan SC, Clark JW, Bidani A.	Artif Organs. 1994 Nov;18(11):833-9.	1994	pubmed	Y	No clinical data
Extracorporeal membrane oxygenation for pediatric respiratory failure: five-year experience at the University of Pittsburgh.	Morton A, Dalton H, Kochanek P, Janosky J, Thompson A.	Crit Care Med. 1994 Oct;22(10):1659-67.	1994	pubmed	Y	Less 18yr
Taming the technology for adult respiratory distress syndrome in children.	Nichols DG.	Crit Care Med. 1994 Oct;22(10):1521-4. No abstract available.	1994	pubmed	Y	Review / M-A
[Treatment of acute pulmonary infection in a mucoviscidosis patient with extracorporeal lung support].	KrÃ¤mer M, HÃ¶ltermann W, Lukasewitz P, van Wickern M, Walthers EM, Lennartz H.	Pneumologie. 1994 Oct;48(10):765-8. German.	1994	pubmed	Y	Less 50 patients
[Prolonged respiratory support with extracorporeal membrane oxygenation in lung transplantation].	Gomes WJ, Forte V, Perfeito JA, Ota JS, Bueno CE, Amarante GA, Bertuccez JA, Buffolo E.	Arq Bras Cardiol. 1994 Oct;63(4):299-301. Portuguese.	1994	pubmed	Y	Less 50 patients
Coronary artery fistula in the pediatric age group: a 19-year institutional experience.	Davis JT, Allen HD, Wheller JJ, Chan DP, Cohen DM, Teske DW, Cassidy SC, Craenen JM, Kilman JW.	Ann Thorac Surg. 1994 Sep;58(3):760-3.	1994	pubmed	Y	No clinical data
Extracorporeal membrane oxygenation therapy for adult respiratory distress syndrome developing post liver transplantation.	Jeng LB, Cheng MH, Lee WC, Wang CC, Wang KL, Chen SC, Chen MF, Chien RN, Chiu CT, Lin DY, et al.	Transplant Proc. 1994 Aug;26(4):2237-8. No abstract available.	1994	pubmed	Y	Less 50 patients
Extracorporeal membrane oxygenation in the successful treatment of traumatic adult respiratory distress syndrome: case report and review.	Plotkin JS, Shah JB, Lofland GK, DeWolf AM.	J Trauma. 1994 Jul;37(1):127-30. Review.	1994	pubmed	Y	Less 50 patients
Lung structure and function in different stages of severe adult respiratory distress syndrome.	Gattinoni L, Bombino M, Pelosi P, Lissoni A, Pesenti A, Fumagalli R, Tagliabue M.	JAMA. 1994 Jun 8;271(22):1772-9.	1994	pubmed	Y	No Complications Reported
[Present status of extracorporeal membrane oxygenation for adult respiratory failure].	Kobayashi K.	Rinsho Kyobu Geka. 1994 Jun;14(3):179-83. Review. Japanese.	1994	pubmed	Y	Not english
[Therapy of ARDS. 2. New management methods--first clinical experiences].	Rossaint R, Pappert D, Gerlach H, Falke K.	Anaesthesist. 1994 Jun;43(6):364-75. Review. German.	1994	pubmed	Y	Not english
Transport of the patient on cardiopulmonary support.	Calderon M, Verdin R.	Ann Thorac Surg. 1994 Jun;57(6):1689. No abstract available.	1994	pubmed	Y	Less 50 patients
[Clinical experience of extracorporeal life support with the use of centrifugal pump ECMO].	Noguchi T, Setoguchi K, Mori M, Yoshitake S, Kitano T, Iwasaki H, Hayano Y, Honda N.	Masui. 1994 May;43(5):767-9. Japanese.	1994	pubmed	Y	Less 50 patients
Pulmonary metastases of gestational trophoblastic tumor. Risk factors for early respiratory failure.	Bakri YN, Berkowitz RS, Khan J, Goldstein DP, von Sinner W, Jabbar FA.	J Reprod Med. 1994 Mar;39(3):175-8.	1994	pubmed	Y	No clinical data
An anecdote is an anecdote is an anecdote ... but a clinical trial is data.	Donahoe M, Rogers RM.	Am J Respir Crit Care Med. 1994 Feb;149(2 Pt 1):293-4. No abstract available.	1994	pubmed	Y	Review / M-A
Venovenous extracorporeal life support in traumatic bronchial disruption and adult respiratory distress syndrome using surface-heparinized equipment: case report.	Willms DC, Wachtel TL, Daleiden AL, Dembitsky WP, Schibanoff JM, Gibbons JA.	J Trauma. 1994 Feb;36(2):252-4.	1994	pubmed	Y	Less 50 patients
Continuous monitoring of blood gases during hypercapnia in a patient with severe acute lung failure.	Pappert D, Rossaint R, Gerlach H, Falke K.	Intensive Care Med. 1994;20(3):210-1.	1994	pubmed	Y	Less 50 patients
Extracorporeal life support for respiratory failure after multiple trauma	Anderson HL 3rd1, Shapiro MB, Delius RE, Steimle CN, Chapman RA, Bartlett RH.	J Trauma. 1994 Aug;37(2):266-72;	1994	Referenced	Y	V-A ECMO
Veno-venous ELS with heparin bonded circuits.	Marcolin R, Bombino M, Fumagalli R, Pesenti A.	Int J Artif Organs. 1995 Oct;18(10):624-6. No abstract available.	1995	pubmed	Y	Less 50 patients
Influence of mixed venous PO2 and inspired O2 fraction on intrapulmonary shunt in patients with severe ARDS.	Rossaint R, Hahn SM, Pappert D, Falke KJ, Radermacher P.	J Appl Physiol (1985). 1995 Apr;78(4):1531-6.	1995	pubmed	Y	Less 50 patients
Liquid ventilation in adults, children, and full-term neonates.	Hirschl RB, Pranikoff T, Gauger P, Schreiner RJ, Dechert R, Bartlett RH.	Lancet. 1995 Nov 4;346(8984):1201-2.	1995	pubmed	Y	No clinical data
[Extracorporeal membrane oxygenation in adult respiratory distress syndrome. Experience in 2 patients].	Alamo M, Castro J, Alvarez E, Brunet L.	Rev Med Chil. 1995 Oct;123(10):1275-83. Review. Spanish.	1995	pubmed	Y	Less 50 patients
Treatment of severe non-neonatal ARDS in children with surfactant and nitric oxide in a pre-ECMO"-situation."	MÃ¶ller JC, Schaible TF, Reiss I, Artlich A, Gortner L.	Int J Artif Organs. 1995 Oct;18(10):598-602.	1995	pubmed	Y	Less 18yr
Staphylococcal septicemia and adult respiratory distress syndrome in pregnancy treated with extracorporeal carbon dioxide removal.	Greenberg LR, Moore TR.	Obstet Gynecol. 1995 Oct;86(4 Pt 2):657-60.	1995	pubmed	Y	Less 50 patients
Simultaneous acute cerebral and pulmonary edema complicating diabetic ketoacidosis.	Young MC.	Diabetes Care. 1995 Sep;18(9):1288-90.	1995	pubmed	Y	Less 18yr
Extracorporeal membrane oxygenation as an adjunct treatment for primary graft failure in adult lung transplant recipients.	Glassman LR, Keenan RJ, Fabrizio MC, Sonett JR, Bierman MI, Pham SM, Griffith BP.	J Thorac Cardiovasc Surg. 1995 Sep;110(3):723-6; discussion 726-7.	1995	pubmed	Y	V-A ECMO
Severe respiratory insufficiency complicating Epstein-Barr virus infection: case report and review.	Haller A, von Segesser L, Baumann PC, Krause M.	Clin Infect Dis. 1995 Jul;21(1):206-9. Review.	1995	pubmed	Y	Less 50 patients
Intravenacaval membrane oxygenation and carbon dioxide removal in severe acute respiratory failure.	Conrad SA, Eggerstedt JM, Grier LR, Morris VF, Romero MD.	Chest. 1995 Jun;107(6):1689-97.	1995	pubmed	Y	No clinical data
Probability of survival after prolonged extracorporeal membrane oxygenation in pediatric patients with acute respiratory failure. Extracorporeal Life Support Organization.	Green TP, Moler FW, Goodman DM.	Crit Care Med. 1995 Jun;23(6):1132-9.	1995	pubmed	Y	Less 18yr
[Nitrogen oxide inhalation in acute pulmonary failure].	Jensen TH, Henneberg SW, Heslet L, Andersen PK.	Ugeskr Laeger. 1995 May 15;157(20):2862-4. Danish.	1995	pubmed	Y	Less 50 patients
Extracorporeal lung assist in the adult trauma patient.	Cottingham CA, Habashi NM.	AACN Clin Issues. 1995 May;6(2):229-41. Review.	1995	pubmed	Y	Review / M-A
ECCO2R: an experimental approach to treating ARDS.	Chillcott S, Sheridan PS.	Crit Care Nurse. 1995 Apr;15(2):50-6. No abstract available.	1995	pubmed	Y	Less 50 patients
[Venovenous extracorporeal membrane oxygenation in an elderly patient with severe respiratory failure--report of a case].	Yamamoto K, Maruyama Y, Ohzeki H, Shinonaga M, Ueno M, Eguch S.	Nihon Kyobu Geka Gakkai Zasshi. 1995 Apr;43(4):547-52. Japanese.	1995	pubmed	Y	Less 50 patients
Effects of inhaled nitric oxide on right ventricular function in severe acute respiratory distress syndrome.	Rossaint R, Slama K, Steudel W, Gerlach H, Pappert D, Veit S, Falke K.	Intensive Care Med. 1995 Mar;21(3):197-203.	1995	pubmed	Y	No Complications Reported
Extracorporeal membrane oxygenation for respiratory failure.	Yamagishi T, Ishikawa S, Otaki A, Otani Y, Takahashi T, Sato Y, Yoshida I, Kunimoto F, Arai K, Morishita Y.	Surg Today. 1995;25(8):690-3.	1995	pubmed	Y	V-A ECMO
[Role of extracorporeal circulation in reversible acute cardiorespiratory insufficiency in neonatal and pediatric intensive care].	Tuo P, Calza G, Moretti R, Pallecchi AE, Pessagno A, Balzarini C, Tumolo M, Fossa S.	Pediatr Med Chir. 1995 Jan-Feb;17(1):33-6. Review. Italian.	1995	pubmed	Y	Less 18yr
[Impaired free radical oxidation and structural-functional state of erythrocytes in chronic respiratory insufficiency and a method of their correction].	Demikhova OV, Serebrianaia BA, Shmelev EI.	Vestn Ross Akad Med Nauk. 1995;(7):54-8. Russian.	1995	pubmed	Y	Not english
Reduction of ventilator settings allowed by intravenous oxygenator (IVOX) in ARDS patients.	Mira JP, Brunet F, Belghith M, Soubrane O, Termignon JL, Renaud B, Hamy I, Monchi M, Deslande E, Fierobe L, et al.	Intensive Care Med. 1995 Jan;21(1):11-7.	1995	pubmed	Y	No clinical data
Seal-less centrifugal blood pump with magnetically suspended rotor: rot-a-flot.	Mendler N1, Podechtl F, Feil G, Hiltmann P, Sebening F.	Artif Organs. 1995 Jul;19(7):620-4.	1995	Referenced	Y	No clinical data
Severity and outcome of ARDS: the present place of extracorporeal lung assist (ECLA)	Steltzer H1, Krafft P, Fridrich P, Hammerle AF.	Int J Artif Organs. 1995 Oct;18(10):607-10.	1995	Referenced	Y	Review / M-A
Complications of extracorporeal life support systems using heparin-bound surfaces. The risk of intracardiac clot formation.	Muehrcke DD1, McCarthy PM, Stewart RW, Seshagiri S, Ogella DA, Foster RC, Cosgrove DM.	J Thorac Cardiovasc Surg. 1995 Sep;110(3):843-51.	1995	Referenced	Y	V-A ECMO
Independent ventilation and ECMO for severe unilateral pulmonary edema after SLT for primary pulmonary hypertension.	Badesch DB1, Zamora MR, Jones S, Campbell DW, Fullerton DA.	Chest. 1995 Jun;107(6):1766-70.	1995	Referenced	Y	Less 50 patients
Complications during long-term extracorporeal lung assist (ECLA).	Briegel J, Hummel T, Lenhart A, Heyduck M, Schelling G, Haller M.	Acta Anaesthesiol Scand Suppl. 1996;109:121-2. No abstract available.	1996	pubmed	Y	Less 50 patients
[Application of extracorporeal membrane oxygenation for respiratory failure following septic pulmonary emboli].	Kiyama H, Ohshima N, Hata I, Imazeki T, Yamada T.	Nihon Kyobu Geka Gakkai Zasshi. 1996 Oct;44(10):1912-6. Japanese.	1996	pubmed	Y	Less 50 patients
ECMO support for adult patients with acute respiratory failure.	Macha M, Griffith BP, Keenan R, Kawai A, Hattler BG, Fabrizio C, Kormos RL, Hardesty RL, Boujoukos A, Pham SM.	ASAIO J. 1996 Sep-Oct;42(5):M841-4.	1996	pubmed	Y	V-A ECMO
Acute in vivo studies of the Pittsburgh intravenous membrane oxygenator.	Macha M, Federspiel WJ, Lund LW, Sawzik PJ, Litwak P, Walters FR, Reeder GD, Borovetz HS, Hattler BG.	ASAIO J. 1996 Sep-Oct;42(5):M609-15.	1996	pubmed	Y	No clinical data
[Acute respiratory failure in the adult: pathophysiology, diagnosis and treatment].	Lewandowski K, Lohbrunner H, Falke KJ.	Pneumologie. 1996 Aug;50(8):505-17. Review. German. No abstract available.	1996	pubmed	Y	Not english
Management of acute airway obstruction using extracorporeal membrane oxygenation.	Morneault L, Johnston A, Perreault T.	ASAIO J. 1996 Jul-Aug;42(4):321-3.	1996	pubmed	Y	Less 18yr
[Extracorporeal membrane oxygenation (ECMO) in the newborn infant and the child with intractable respiratory failure].	Pettenazzo A, Biban P, Gamba PG, Cogo P, Zaglia F, Morbin G, Amigoni A, Marzini S, Chiandetti L.	Pediatr Med Chir. 1996 May-Jun;18(3):235-42. Review. Italian.	1996	pubmed	Y	Less 18yr
[Venovenous extracorporeal membrane oxygenation (ECMO) with a heparin-lock bypass system. An effective addition in the treatment of acute respiratory failure (ARDS)].	Manert W, Haller M, Briegel J, Hummel T, Kilger E, Polasek J, Forst H, Peter K.	Anaesthesist. 1996 May;45(5):437-48. German.	1996	pubmed	Y	Not english
Extracorporeal membrane oxygenation (ECMO) as lung or heart assist.	Bjertnaes L, Vaage J, Almdahl SM, Lie M, Nilsen PA, Hansen K, SolbÃ¸ J, Jolin A, Hotvedt R, Olafsen K, BrÃ¶ndbo A, Thoner J, Gilbert M, HevrÃ¸y O, BjÃ¸rsvik G, Hesselberg N, Bergland H, Sivertsen O.	Acta Anaesthesiol Scand. 1996 Mar;40(3):293-301.	1996	pubmed	Y	Less 50 patients
Small pore size microporous membrane oxygenator reduces plasma leakage during prolonged extracorporeal circulation: a case report.	Musch G, Verweij M, Bombino M, Banfi G, Fumagalli R, Pesenti A.	Int J Artif Organs. 1996 Mar;19(3):177-80.	1996	pubmed	Y	Less 18yr
Extracorporeal membrane oxygenation in adults: radiographic findings and correlation of lung opacity with patient mortality.	Jamadar DA, Kazerooni EA, Cascade PN, Fazzalari FL, Vydareny KH, Bartlett RH.	Radiology. 1996 Mar;198(3):693-8.	1996	pubmed	Y	V-A ECMO
Current status of extracorporeal membrane oxygenation for severe respiratory failure.	Ichiba S, Bartlett RH.	Artif Organs. 1996 Feb;20(2):120-3. Review.	1996	pubmed	Y	ELSO db
The impact of extracorporeal membrane oxygenation on survival in pediatric patients with acute respiratory failure. Pediatric Critical Care Study Group.	Green TP, Timmons OD, Fackler JC, Moler FW, Thompson AE, Sweeney MF.	Crit Care Med. 1996 Feb;24(2):323-9.	1996	pubmed	Y	Review / M-A
High frequency ventilation techniques in ARDS.	Lanzenberger-Schragl E, Donner A, Kashanipour A, Zimpfer M.	Acta Anaesthesiol Scand Suppl. 1996;109:157-61.	1996	pubmed	Y	No clinical data
Definition of severity and compiling of entry criteria in patients undergoing ECLA: the use of a fuzzy logic expert system.	Steltzer H, Fridrich P, Steimann F, Rossaint R, Adlassnig K, Hammerle A.	Acta Anaesthesiol Scand Suppl. 1996;109:125-6. No abstract available.	1996	pubmed	Y	No Complications Reported
Extracorporeal lung assist in ARDS: history and state of the art.	Lennartz H.	Acta Anaesthesiol Scand Suppl. 1996;109:114-6. Review. No abstract available.	1996	pubmed	Y	Review / M-A
Extracorporeal oxygenation.	Esen F.	Adv Exp Med Biol. 1996;388:513-9. Review. No abstract available.	1996	pubmed	Y	Review / M-A
[Extracorporeal respiratory assistance. Experience in the treatment of severe acute respiratory failure].	Castillo L, Bugedo G, HernÃ¡ndez G, Montes JM, Pablo Ilic J, Labarca E.	Rev Med Chil. 1996 Jan;124(1):45-56. Spanish.	1996	pubmed	Y	Not available
Blood utilization in adult patients undergoing extracorporeal membrane oxygenated therapy.	Butch SH, Knafl P, Oberman HA, Bartlett RH.	Transfusion. 1996 Jan;36(1):61-3.	1996	pubmed	Y	V-A ECMO
Extracorporeal membrane oxygenation for adult respiratory failure.	Peek GJ, Moore HM, Moore N, Sosnowski AW, Firmin RK.	Chest. 1997 Sep;112(3):759-64.	1997	pubmed	Y	Less 18yr
High survival rate in 122 ARDS patients managed according to a clinical algorithm including extracorporeal membrane oxygenation.	Lewandowski K, Rossaint R, Pappert D, Gerlach H, Slama KJ, Weidemann H, Frey DJ, Hoffmann O, Keske U, Falke KJ.	Intensive Care Med. 1997 Aug;23(8):819-35.	1997	pubmed	Y	Less 50 patients
Mortality is directly related to the duration of mechanical ventilation before the initiation of extracorporeal life support for severe respiratory failure.	Pranikoff T, Hirschl RB, Steimle CN, Anderson HL 3rd, Bartlett RH.	Crit Care Med. 1997 Jan;25(1):28-32.	1997	pubmed	Y	Less 50 patients
Hypoxic pulmonary vasoconstriction in nonventilated lung areas contributes to differences in hemodynamic and gas exchange responses to inhalation of nitric oxide.	Benzing A, Mols G, Brieschal T, Geiger K.	Anesthesiology. 1997 Jun;86(6):1254-61.	1997	pubmed	Y	Less 50 patients
Extracorporeal membrane oxygenation for transport of hypoxaemic patients with severe ARDS.	Rossaint R, Pappert D, Gerlach H, Lewandowski K, Keh D, Falke K.	Br J Anaesth. 1997 Mar;78(3):241-6.	1997	pubmed	Y	Less 50 patients
[Extracorporeal membrane oxygenation for acute respiratory failure induced by Legionella pneumoniae. (Case report)].	Nakajima H, Kutsuwada T, Ohdaira T, Saito A, Satoh K, Igarashi K, Suzuki E, Arakawa M.	Nihon Kyobu Shikkan Gakkai Zasshi. 1997 Dec;35(12):1363-7. Japanese.	1997	pubmed	Y	Less 50 patients
Liquid-assisted ventilation: physiology and clinical application.	Weis CM, Wolfson MR, Shaffer TH.	Ann Med. 1997 Dec;29(6):509-17. Review.	1997	pubmed	Y	Review / M-A
[Resuscitation of a near-drowning patient by the use of a portable extracorporeal circulation device].	Kumle B, DÃ¶ring B, Mertes H, Posival H.	Anasthesiol Intensivmed Notfallmed Schmerzther. 1997 Dec;32(12):754-6. German.	1997	pubmed	Y	Less 50 patients
[ARDS and Wegener granulomatosis].	Loscar M, Hummel T, Haller M, Briegel J, Wiebecke B, Samtleben W, Berger H, Eichhorn P, Schelling G.	Anaesthesist. 1997 Nov;46(11):969-73. German.	1997	pubmed	Y	Less 50 patients
[Does extracorporeal membrane oxygenation (ECMO) have a future?: Pro].	MÃ¼ller E.	Anasthesiol Intensivmed Notfallmed Schmerzther. 1997 Oct;32(10):635-7. German. No abstract available.	1997	pubmed	Y	Not english
Is extracorporeal CO2 removal an option in the treatment of adult respiratory distress syndrome?	Deslauriers J, Awad JA.	Ann Thorac Surg. 1997 Dec;64(6):1581-2. No abstract available.	1997	pubmed	Y	Review / M-A
Extracorporeal life support for 100 adult patients with severe respiratory failure.	Kolla S, Awad SS, Rich PB, Schreiner RJ, Hirschl RB, Bartlett RH.	Ann Surg. 1997 Oct;226(4):544-64; discussion 565-6.	1997	pubmed	Y	V-A ECMO
Early response to inhaled nitric oxide and its relationship to outcome in children with severe hypoxemic respiratory failure.	Goldman AP, Tasker RC, Hosiasson S, Henrichsen T, Macrae DJ.	Chest. 1997 Sep;112(3):752-8.	1997	pubmed	Y	Less 18yr
Randomized clinical trial of pressure-controlled inverse ratio ventilation and extracorporeal CO2 removal for adult respiratory distress syndrome.	Falke KJ.	Am J Respir Crit Care Med. 1997 Sep;156(3 Pt 1):1016-7. No abstract available.	1997	pubmed	Y	No Complications Reported
Inhalation injury treated with extracorporeal CO2 elimination.	Kornberger E, Mair P, Oswald E, HÃ¶rmann C, Ohler K, Balogh D.	Burns. 1997 Jun;23(4):354-9.	1997	pubmed	Y	Less 18yr
Airway management of neonates with antenatally detected head and neck anomalies.	Stocks RM, Egerman RS, Woodson GE, Bower CM, Thompson JW, Wiet GJ.	Arch Otolaryngol Head Neck Surg. 1997 Jun;123(6):641-5.	1997	pubmed	Y	Less 18yr
[Low-flow membrane oxygenation of blood in patients with diffuse purulent peritonitis].	Vatazin AV, Lobakov AI, Tishenina RS, Krivtsova IV, Karichev ZR, VishnevskiÄ­ ME, Vasin IuV, Drozdova GA.	Anesteziol Reanimatol. 1997 May-Jun;(3):45-9. Russian.	1997	pubmed	Y	Not english
Extracorporeal membrane oxygenation for early graft dysfunction in lung transplantation: a case report.	Ball JW Jr, Noon GP, Short HD, Scheinin SA.	J Heart Lung Transplant. 1997 Apr;16(4):468-71.	1997	pubmed	Y	Less 50 patients
Successful emergency transplantation of a liver allograft from a donor maintained on extracorporeal membrane oxygenation.	Johnson LB, Plotkin JS, Howell CD, Njoku MJ, Kuo PC, Bartlett ST.	Transplantation. 1997 Mar 27;63(6):910-1.	1997	pubmed	Y	Less 50 patients
Results of extracorporeal membrane oxygenation in children with sepsis. The Extracorporeal Life Support Organization.	Meyer DM, Jessen ME.	Ann Thorac Surg. 1997 Mar;63(3):756-61.	1997	pubmed	Y	Less 18yr
Extracorporeal support for intractable cardiorespiratory failure due to meningococcal disease.	Goldman AP, Kerr SJ, Butt W, Marsh MJ, Murdoch IA, Paul T, Firmin RK, Tasker RC, Macrae DJ.	Lancet. 1997 Feb 15;349(9050):466-9.	1997	pubmed	Y	Less 18yr
[Surgical interventions in extracorporeal membrane oxygenation (ECMO)].	FÃ¼rst H, Briegel J, Haller M, Hummel T, Hatz R.	Langenbecks Arch Chir Suppl Kongressbd. 1997;114:1384-6. German.	1997	pubmed	Y	Not english
[Extracorporeal membrane oxygenation, ultrafiltration and hemosorption in complex treatment of adult respiratory distress syndrome].	Lapshin VN, Shakh BN.	Vestn Khir Im I I Grek. 1997;156(6):42-4. Russian. No abstract available.	1997	pubmed	Y	Not english
Extracorporeal lung assist (ELA) in adults: indications and application.	Germann P, Ullrich R, Donner A, Urak G, Kneifel W, Hartmann T, RÃ¶der G, Zimpfer M.	Acta Anaesthesiol Scand Suppl. 1997;111:132-5. No abstract available.	1997	pubmed	Y	Review / M-A
Extracorporeal life support for cardiorespiratory failure.	Anderson HL 3rd.	Adv Surg. 1997;31:189-215. Review. No abstract available.	1997	pubmed	Y	Review / M-A
Extracorporeal Life Support Registry Report 1995.	Bartlett RH.	ASAIO J. 1997 Jan-Feb;43(1):104-7.	1997	pubmed	Y	ELSO db
Extracorporeal support of oxygenation and ventilation.	Furukawa S.	Int Anesthesiol Clin. 1997 Winter;35(1):169-76. Review.	1997	pubmed	Y	Review / M-A
Hemolysis in different centrifugal pumps.	Kawahito K1, Nosé Y.	Artif Organs. 1997 Apr;21(4):323-6.	1997	Referenced	Y	No clinical data
An under-occluded roller pump is less hemolytic than a centrifugal pump.	Rawn DJ1, Harris HK, Riley JB, Yoda DN, Blackwell MM.	J Extra Corpor Technol. 1997 Mar;29(1):15-8.	1997	Referenced	Y	No clinical data
Silicone-coated polypropylene hollow-fiber oxygenator: experimental evaluation and preliminary clinical use.	Shimono T1, Shomura Y, Hioki I, Shimamoto A, Tenpaku H, Maze Y, Onoda K, Takao M, Shimpo H, Yada I.	Ann Thorac Surg. 1997 Jun;63(6):1730-6.	1997	Referenced	Y	No clinical data
Significant reduction in minute ventilation and peak inspiratory pressures with arteriovenous CO2 removal during severe respiratory failure.	Tao W1, Brunston RL Jr, Bidani A, Pirtle P, Dy J, Cardenas VJ Jr, Traber DL, Zwischenberger JB.	Crit Care Med. 1997 Apr;25(4):689-95.	1997	Referenced	Y	No clinical data
The spatial distribution of pulmonary lesions in severe ARDS. An autopsy study of 35 cases.	Barth PJ, HÃ¶ltermann W, MÃ¼ller B.	Pathol Res Pract. 1998;194(7):465-71.	1998	pubmed	Y	Less 50 patients
Morphological changes in chest radiographs of patients with acute respiratory distress syndrome (ARDS).	MÃ¤urer J, Kendzia A, Gerlach H, Pappert D, Hierholzer J, Falke KJ, Felix R.	Intensive Care Med. 1998 Nov;24(11):1152-6.	1998	pubmed	Y	Less 50 patients
A prospective comparison of atrio-femoral and femoro-atrial flow in adult venovenous extracorporeal life support.	Rich PB, Awad SS, Crotti S, Hirschl RB, Bartlett RH, Schreiner RJ.	J Thorac Cardiovasc Surg. 1998 Oct;116(4):628-32.	1998	pubmed	Y	Less 50 patients
Temporary extracorporeal membrane oxygenation in the treatment of acute traumatic lung injury.	Voelckel W, Wenzel V, Rieger M, Antretter H, Padosch S, Schobersberger W.	Can J Anaesth. 1998 Nov;45(11):1097-102.	1998	pubmed	Y	Less 50 patients
ECMO in adults: what is its role?	Wassermann J, Mazer CD.	Can J Anaesth. 1998 Nov;45(11):1044-8. English, French. No abstract available.	1998	pubmed	Y	Review / M-A
Adult respiratory distress syndrome following cardiopulmonary bypass: incidence, prophylaxis and management.	Kaul TK, Fields BL, Riggins LS, Wyatt DA, Jones CR, Nagle D.	J Cardiovasc Surg (Torino). 1998 Dec;39(6):777-81.	1998	pubmed	Y	V-A ECMO
The use of extracorporeal membrane oxygenation in postpneumonectomy pulmonary oedema.	Verhelst H, Vranken J, Muysoms F, Rondelez L, SchroÃ« H, De Jongh R.	Acta Chir Belg. 1998 Dec;98(6):269-72.	1998	pubmed	Y	Less 50 patients
Extracorporeal membrane oxygenation for nonneonatal pulmonary and multiple-organ failure.	Weber TR, Kountzman B.	J Pediatr Surg. 1998 Nov;33(11):1605-9.	1998	pubmed	Y	Less 18yr
Successful utilization of ECMO to treat an adult burn patient with ARDS.	Patton ML, Simone MR, Kraut JD, Anderson HL 3rd, Haith LR Jr.	Burns. 1998 Sep;24(6):566-8.	1998	pubmed	Y	Less 50 patients
Extracorporeal membrane oxygenation: potential for adults and children?	Peek GJ, Killer HM, Sosnowski AW, Firmin RK.	Hosp Med. 1998 Apr;59(4):304-8. Review.	1998	pubmed	Y	Review / M-A
Veno-venous extracorporeal lung assist with concurrent distal aortic perfusion: repair of ruptured aorta in a patient with dense ARDS.	Borg UR, Reynolds HN, Habashi NM.	Int J Artif Organs. 1998 Jun;21(6):344-7.	1998	pubmed	Y	Less 50 patients
Systemic Fusarium oxysporum infection in an immunocompetent patient with an adult respiratory distress syndrome (ARDS) and extracorporal membrane oxygenation (ECMO).	Sander A, Beyer U, Amberg R.	Mycoses. 1998 Mar-Apr;41(3-4):109-11.	1998	pubmed	Y	Less 50 patients
Severe acute extrinsic airway compression by mediastinal tumor successfully managed with extracorporeal membrane oxygenation.	Stewart AS, Smythe WR, Aukburg S, Kaiser LR, Fox KR, Bavaria JE.	ASAIO J. 1998 May-Jun;44(3):219-21.	1998	pubmed	Y	Less 50 patients
Severe acute respiratory distress syndrome secondary to acute pancreatitis successfully treated with extracorporeal membrane oxygenation in three patients.	Peek GJ, White S, Scott AD, Hall AW, Moore HM, Sosnowski AW, Firmin RK.	Ann Surg. 1998 Apr;227(4):572-4.	1998	pubmed	Y	Less 50 patients
[Health-related quality of life. Long-term survival in patients with ARDS following extracorporeal membrane oxygenation (ECMO)].	Stoll C, Haller M, Briegel J, Meier M, Manert W, Hummel T, Heyduck M, Lenhart A, Polasek J, Bullinger M, Schelling G.	Anaesthesist. 1998 Jan;47(1):24-9. German.	1998	pubmed	Y	Not english
Adult extracorporeal membrane oxygenation for severe respiratory failure.	Alpard SK, Zwischenberger JB.	Perfusion. 1998 Jan;13(1):3-15. Review. No abstract available.	1998	pubmed	Y	Review / M-A
Successful treatment of adults with severe Hantavirus pulmonary syndrome with extracorporeal membrane oxygenation.	Crowley MR, Katz RW, Kessler R, Simpson SQ, Levy H, Hallin GW, Cappon J, Krahling JB, Wernly J.	Crit Care Med. 1998 Feb;26(2):409-14. Review. Erratum in: Crit Care Med 1998 Apr;26(4):806.	1998	pubmed	Y	Less 50 patients
Severe Hantavirus pulmonary syndrome: a new indication for extracorporeal life support?	Serna D, Brenner M, Chen JC.	Crit Care Med. 1998 Feb;26(2):217-8. No abstract available.	1998	pubmed	Y	Review / M-A
Venovenous extracorporeal life support via percutaneous cannulation in 94 patients.	Pranikoff T1, Hirschl RB, Remenapp R, Swaniker F, Bartlett RH	Chest. 1999 Mar;115(3):818-22.	1999	Referenced	Y	Risk of Bias
Extracorporeal life support in pulmonary failure after trauma.	Michaels AJ, Schriener RJ, Kolla S, Awad SS, Rich PB, Reickert C, Younger J, Hirschl RB, Bartlett RH.	J Trauma. 1999 Apr;46(4):638-45.	1999	pubmed	Y	Less 50 patients
Controlled airway pressure therapy, nitric oxide inhalation, prone position, and extracorporeal membrane oxygenation (ECMO) as components of an integrated approach to ARDS.	Ullrich R, Lorber C, RÃ¶der G, Urak G, Faryniak B, Sladen RN, Germann P.	Anesthesiology. 1999 Dec;91(6):1577-86.	1999	pubmed	Y	Less 50 patients
Percutaneous extracorporeal arteriovenous CO2 removal for severe respiratory failure.	Zwischenberger JB, Conrad SA, Alpard SK, Grier LR, Bidani A.	Ann Thorac Surg. 1999 Jul;68(1):181-7.	1999	pubmed	Y	Less 50 patients
Nosocomial infections in adult patients undergoing extracorporeal membrane oxygenation.	Burket JS, Bartlett RH, Vander Hyde K, Chenoweth CE.	Clin Infect Dis. 1999 Apr;28(4):828-33.	1999	pubmed	Y	Unable to find data
Ultrastructural changes in the lung alveoli after cardiac surgical operations with the use of cardiopulmonary bypass (CPB).	Wasowicz M, SobczyÅ„ski P, Biczysko W, Szulc R.	Pol J Pathol. 1999;50(3):189-96.	1999	pubmed	Y	V-A ECMO
[When should a patient with severe acute respiratory distress syndrome (ARDS) be transferred to a specialized hospital?].	HÃ¶ltermann W, KrÃ¤mer M, Peters P, Theisen M, Thiele S, Lukasewitz P, van Wickern M.	Wien Med Wochenschr. 1999;149(12):345-51. German.	1999	pubmed	Y	Not english
Venovenous ECMO in life-threatening radiocontrast mediated-ARDS.	Machiels JP, Evrard P, Dive A, Bulpa P, InstallÃ© E.	Intensive Care Med. 1999 May;25(5):546. No abstract available.	1999	pubmed	Y	Less 50 patients
Zelen randomization: attitudes of parents participating in a neonatal clinical trial.	Snowdon C, Elbourne D, Garcia J.	Control Clin Trials. 1999 Apr;20(2):149-71.	1999	pubmed	Y	Less 18yr
Extracorporeal membrane oxygenation for nonneonatal acute respiratory failure.	Masiakos PT, Islam S, Doody DP, Schnitzer JJ, Ryan DP.	Arch Surg. 1999 Apr;134(4):375-9; discussion 379-80.	1999	pubmed	Y	Unable to find data
Severe acute respiratory failure due to legionella pneumonia treated with extracorporeal membrane oxygenation.	Ichiba S, Jenkins DR, Peek GJ, Brennan KJ, Killer HM, Sosnowski A, Firmin RK.	Clin Infect Dis. 1999 Mar;28(3):686-7. No abstract available.	1999	pubmed	Y	Less 50 patients
Rapid activation of the alternative pathway of complement by extracorporeal membrane oxygenation.	Vallhonrat H, Swinford RD, Ingelfinger JR, Williams WW, Ryan DP, Tolkoff-Rubin N, Cosimi AB, Pascual M.	ASAIO J. 1999 Jan-Feb;45(1):113-4.	1999	pubmed	Y	Less 50 patients
Intravascular membrane oxygenator and carbon dioxide removal devices: a review of performance and improvements.	Zwischenberger JB, Tao W, Bidani A.	ASAIO J. 1999 Jan-Feb;45(1):41-6. Review.	1999	pubmed	Y	No clinical data
Successful extracorporeal membrane oxygenation in four children with malignant disease and severe Pneumocystis carinii pneumonia.	LindÃ©n V, KarlÃ©n J, Olsson M, PalmÃ©r K, EhrÃ©n H, Henter JI, Kalin M.	Med Pediatr Oncol. 1999 Jan;32(1):25-31.	1999	pubmed	Y	Less 18yr
Centrifugal pumps: description of devices and surgical techniques.	Curtis JJ1, Walls JT, Wagner-Mann CC, Schmaltz RA, Demmy TL, McKenney CA, Mann FA.	Ann Thorac Surg. 1999 Aug;68(2):666-71.	1999	Referenced	Y	V-A ECMO
Risk factors for intracranial hemorrhage in adults on extracorporeal membrane oxygenation.	Kasirajan V1, Smedira NG, McCarthy JF, Casselman F, Boparai N, McCarthy PM	Eur J Cardiothorac Surg. 1999 Apr;15(4):508-14	1999	Referenced	Y	V-A ECMO
Extracorporeal life support: the University of Michigan experience.	Bartlett RH, Roloff DW, Custer JR, Younger JG, Hirschl RB.	JAMA. 2000 Feb 16;283(7):904-8.	2000	pubmed	Y	V-A ECMO
Modifying a venovenous extracorporeal membrane oxygenation circuit to reduce recirculation.	Ichiba S, Peek GJ, Sosnowski AW, Brennan KJ, Firmin RK.	Ann Thorac Surg. 2000 Jan;69(1):298-9.	2000	pubmed	Y	Less 50 patients
Pumpless extracorporeal lung assist - experience with the first 20 cases.	Liebold A, Reng CM, Philipp A, Pfeifer M, Birnbaum DE.	Eur J Cardiothorac Surg. 2000 May;17(5):608-13.	2000	pubmed	Y	Less 50 patients
Pumpless extracorporeal lung assist and adult respiratory distress syndrome.	Reng M, Philipp A, Kaiser M, Pfeifer M, Gruene S, Schoelmerich J.	Lancet. 2000 Jul 15;356(9225):219-20.	2000	pubmed	Y	Less 50 patients
High survival in adult patients with acute respiratory distress syndrome treated by extracorporeal membrane oxygenation, minimal sedation, and pressure supported ventilation.	Lindén V, Palmér K, Reinhard J, Westman R, EhrÃ©n H, Granholm T, Frenckner B.	Intensive Care Med. 2000 Nov;26(11):1630-7.	2000	pubmed	Y	Less 50 patients
Neonatal listeriosis with severe respiratory failure responding to nitric oxide inhalation.	Ichiba H, Fujioka H, Saitoh M, Shintaku H.	Pediatr Int. 2000 Dec;42(6):696-8. No abstract available.	2000	pubmed	Y	Less 18yr
Other modalities of oxygen therapy: hyperbaric oxygen, nitric oxide, and ECMO.	Lustbader D, Fein A.	Respir Care Clin N Am. 2000 Dec;6(4):659-74. Review.	2000	pubmed	Y	Not available
Surfactant rescue or liquid ventilation for adult respiratory distress syndrome.	D'Ancona G, Ricci M, Karamanoukian H.	J Cardiothorac Vasc Anesth. 2000 Dec;14(6):760-2. No abstract available.	2000	pubmed	Y	No clinical data
Successful treatment of a patient with multiple injuries using extracorporeal membrane oxygenation and inhaled nitric oxide.	Sasadeusz KJ, Long WB 3rd, Kemalyan N, Datena SJ, Hill JG.	J Trauma. 2000 Dec;49(6):1126-8. No abstract available.	2000	pubmed	Y	Less 50 patients
Indications and efficacy of apheresis for liver transplant recipients: experience of 16 cases in 34 living-related liver transplants.	Kawagishi N, Ohkohchi N, Fujimori K, Orii T, Chubachi S, Koyamada N, Watanabe M, Asakura T, Gotoh M, Satomi S.	Transplant Proc. 2000 Nov;32(7):2111-3. No abstract available.	2000	pubmed	Y	No clinical data
Extracorporeal membrane oxygenation for severe acute respiratory failure.	Lewandowski K.	Crit Care. 2000;4(3):156-68. Epub 2000 Apr 12. Review.	2000	pubmed	Y	Review / M-A
[World champion in ECLS/ECMO? Large material from the ECLS clinic in Michigan presented in JAMA].	LindÃ©n V, PalmÃ©r P.	Lakartidningen. 2000 Jul 26;97(30-31):3357. Swedish. No abstract available.	2000	pubmed	Y	Not english
Pumpless extracorporeal lung assist.	MÃ¶ller JC, Schaible TF, Ahrens W, Kohl M.	Lancet. 2000 Sep 23;356(9235):1112. No abstract available.	2000	pubmed	Y	Less 18yr
Femoral venoarterial extracorporeal membrane oxygenation for severe reimplantation response after lung transplantation.	Vlasselaers D, Verleden GM, Meyns B, Van Raemdonck D, Demedts M, Lerut A, Lauwers P.	Chest. 2000 Aug;118(2):559-61.	2000	pubmed	Y	Less 50 patients
ARDS in fulminant ornithosis and treatment with extracorporeal lung assist.	Wichert A, Lukasewitz P, HÃ¤user MH, Bittersohl J, Lennartz H.	Int J Artif Organs. 2000 Jun;23(6):371-4.	2000	pubmed	Y	Less 50 patients
Extracorporeal membrane oxygenation for the management of respiratory failure due to ANCA-associated vasculitis.	Matsumoto T, Ueki K, Tamura S, Ideura H, Tsukada Y, Maezawa A, Nojima Y, Naruse T.	Scand J Rheumatol. 2000;29(3):195-7.	2000	pubmed	Y	Less 50 patients
Extracorporeal membrane oxygenation in pregnancy.	King PT, Rosalion A, McMillan J, Buist M, Holmes PW.	Lancet. 2000 Jul 1;356(9223):45-6.	2000	pubmed	Y	Less 50 patients
[Ventilation in ARDS: respirator, prone position, NO or artificial lung].	Larsson A, Blomqvist H, Frostell C, LindÃ©n V, SjÃ¶strand U, Walther SM.	Lakartidningen. 2000 Apr 26;97(17):2058-63. Review. Swedish.	2000	pubmed	Y	Review / M-A
Extracorporeal support in an adult with severe carbon monoxide poisoning and shock following smoke inhalation: a case report.	McCunn M, Reynolds HN, Cottingham CA, Scalea TM, Habashi NM.	Perfusion. 2000 Mar;15(2):169-73. Review.	2000	pubmed	Y	Less 50 patients
Excessive predicted mortality in acute hypoxemic respiratory failure?	Jones GD, Hatherill M, Murdoch IA.	Crit Care Med. 2000 Feb;28(2):600-1. No abstract available.	2000	pubmed	Y	No clinical data
Low-dose surfactant instillation during extracorporeal membrane oxygenation therapy in a patient with adult respiratory distress syndrome and secondary atelectasis after chest contusion.	Schulz S, Wiebalck A, Frankenberg C, Sivitanidis E, Zenz M.	J Cardiothorac Vasc Anesth. 2000 Feb;14(1):59-62. No abstract available.	2000	pubmed	Y	Less 50 patients
Extracorporeal life support outcome for 128 pediatric patients with respiratory failure.	Swaniker F, Kolla S, Moler F, Custer J, Grams R, Barlett R, Hirschl R.	J Pediatr Surg. 2000 Feb;35(2):197-202.	2000	pubmed	Y	Less 18yr
Extracorporeal life support in the management of severe respiratory failure.	Bartlett RH1.	Clin Chest Med. 2000 Sep;21(3):555-61.	2000	Referenced	Y	Review / M-A
Total extracorporeal arteriovenous carbon dioxide removal in acute respiratory failure: a phase I clinical study.	Conrad SA1, Zwischenberger JB, Grier LR, Alpard SK, Bidani A.	Intensive Care Med. 2001 Aug;27(8):1340-51.	2001	Referenced	Y	Less 50 patients
The use of high-frequency oscillatory ventilation in adults with acute lung injury.	Ferguson ND, Stewart TE.	Respir Care Clin N Am. 2001 Dec;7(4):647-61. Review.	2001	pubmed	Y	Review / M-A
Respiratory failure caused by tuberculous pneumonia requiring extracorporeal membrane oxygenation.	Petrillo TM, Heard ML, Fortenberry JD, Stockwell JA, Leonard MK Jr.	Perfusion. 2001 Nov;16(6):525-9.	2001	pubmed	Y	Less 18yr
Inter-hospital transportation of patients with severe acute respiratory failure on extracorporeal membrane oxygenation--national and international experience.	LindÃ©n V, PalmÃ©r K, Reinhard J, Westman R, EhrÃ©n H, Granholm T, Frenckner B.	Intensive Care Med. 2001 Oct;27(10):1643-8.	2001	pubmed	Y	Unable to find data
[Treatment of the acute respiratory distress syndrome (ARDS)].	Gerlach H.	Dtsch Med Wochenschr. 2001 Oct 19;126(42):1173-7. Review. German. No abstract available.	2001	pubmed	Y	Not english
Extracorporeal membrane oxygenation before induction of anesthesia in critically ill thoracic transplant patients.	de Boer WJ, Waterbolk TW, BrÃ¼gemann J, van der Bij W, Huyzen RJ.	Ann Thorac Surg. 2001 Oct;72(4):1407-8.	2001	pubmed	Y	Less 50 patients
Pulmonary alveolar proteinosis causing severe hypoxemic respiratory failure treated with sequential whole-lung lavage utilizing venovenous extracorporeal membrane oxygenation: a case report and review.	Cohen ES, Elpern E, Silver MR.	Chest. 2001 Sep;120(3):1024-6.	2001	pubmed	Y	Less 50 patients
Application of extracorporeal membrane oxygenation in adult burn patients.	Chou NK, Chen YS, Ko WJ, Huang SC, Chao A, Jan GJ, Lin FY, Wang SS, Chu SH.	Artif Organs. 2001 Aug;25(8):622-6.	2001	pubmed	Y	Less 50 patients
Capgras syndrome: a clinical manifestation of watershed cerebral infarct complicating the use of extracorporeal membrane oxygenation.	Dejode JM, Antonini F, Lagier P, Martin C.	Crit Care. 2001 Aug;5(4):232-5. Epub 2001 Jul 13.	2001	pubmed	Y	Less 50 patients
Infection with Sin Nombre hantavirus: clinical presentation and outcome in children and adolescents.	Ramos MM, Overturf GD, Crowley MR, Rosenberg RB, Hjelle B.	Pediatrics. 2001 Aug;108(2):E27.	2001	pubmed	Y	Less 18yr
Conversion of extracorporeal membrane oxygenation to non-pulsatile left ventricular assist device. Is it out-of-date for non-pulsatile LVAD?	Chen YS, Ko WJ, Chou TF, Chou NK, Hsu RB, Wang SS, Lin FY, Chu SH.	J Cardiovasc Surg (Torino). 2001 Aug;42(4):457-63.	2001	pubmed	Y	V-A ECMO
Successful use of extracorporeal life support in two cases of posttraumatic adult respiratory distress syndrome.	Chughtai T, Hazan C, Tahta S, Shum-Tim D, Fleiszer D, Evans D, Brown R, Mulder D.	J Trauma. 2001 Jun;50(6):1137-9. No abstract available.	2001	pubmed	Y	Less 50 patients
Intravenous chlorhexidine gluconate causing acute respiratory distress syndrome.	Ishigami S, Hase S, Nakashima H, Yamada H, Dohgomori H, Natsugoe S, Aikou T.	J Toxicol Clin Toxicol. 2001;39(1):77-80.	2001	pubmed	Y	Less 50 patients
[10 years experience with extracorporeal membrane oxygenation].	Mols G, Loop T, Hermle G, Buttler J, Huber B, Schubert J, Benzing A.	Anasthesiol Intensivmed Notfallmed Schmerzther. 2001 Jan;36(1):4-14. German.	2001	pubmed	Y	Not english
Nosocomial infections during extracorporeal membrane oxygenation.	O'Neill JM1, Schutze GE, Heulitt MJ, Simpson PM, Taylor BJ.	Intensive Care Med. 2001 Aug;27(8):1247-53.	2001	Referenced	Y	Not available
Pumpless extracorporeal lung assist using an arterio-venous shunt. Applications and limitations.	Liebold A, Philipp A, Kaiser M, Merk J, Schmid FX, Birnbaum DE.	Minerva Anestesiol. 2002 May;68(5):387-91.	2002	pubmed	Y	Unable to find data
A review of 100 patients transported on extracorporeal life support.	Foley DS, Pranikoff T, Younger JG, Swaniker F, Hemmila MR, Remenapp RA, Copenhaver W, Landis D, Hirschl RB, Bartlett RH.	ASAIO J. 2002 Nov-Dec;48(6):612-9.	2002	pubmed	Y	Less 50 patients
Extracorporeal respiratory support and minimally invasive ventilation in severe ARDS.	Frenckner B, PalmÃ©r P, LindÃ©n V.	Minerva Anestesiol. 2002 May;68(5):381-6.	2002	pubmed	Y	Less 50 patients
Early experience with a polymethyl pentene oxygenator for adult extracorporeal life support.	Peek GJ, Killer HM, Reeves R, Sosnowski AW, Firmin RK.	ASAIO J. 2002 Sep-Oct;48(5):480-2.	2002	pubmed	Y	Less 50 patients
Prone positioning does not affect cannula function during extracorporeal membrane oxygenation or continuous renal replacement therapy.	Goettler CE, Pryor JP, Hoey BA, Phillips JK, Balas MC, Shapiro MB.	Crit Care. 2002 Oct;6(5):452-5. Epub 2002 Aug 29.	2002	pubmed	Y	Less 50 patients
Respiratory distress syndrome: principles and current therapy.	Raghavendran K, Kulaylat MN, Thompson B, Ambrus JL.	J Med. 2002;33(1-4):147-65. Review.	2002	pubmed	Y	Review / M-A
Inter-hospital transportation of patients with severe acute respiratory failure on extracorporeal membrane oxygenation.	Bulpa P, Evrard P, Dive A, Pranger D, Gonzales M, Installe E.	Intensive Care Med. 2002 Jun;28(6):802. No abstract available.	2002	pubmed	Y	V-A ECMO
[ARDS and severe brain injury. Therapeutic strategies in conflict].	Bein T, Kuhr LP, Metz C, Woertgen C, Philipp A, Taeger K.	Anaesthesist. 2002 Jul;51(7):552-6. German.	2002	pubmed	Y	Less 50 patients
[Extracorporeal lung support and endovascular stent in traumatic aortic rupture and severe lung failure].	Schmid FX, Philipp A, Faltermeier H, SchÃ¤dinger U, Link J, Birnbaum D.	Unfallchirurg. 2002 Jul;105(7):647-50. German.	2002	pubmed	Y	Less 50 patients
Extracorporeal membrane oxygenation with nafamostat mesilate as an anticoagulant for massive pulmonary hemorrhage after living-donor lobar lung transplantation.	Kotani K, Ichiba S, Andou M, Sano Y, Date H, Tedoriya T, Goto K, Shimizu N.	J Thorac Cardiovasc Surg. 2002 Sep;124(3):626-7. No abstract available.	2002	pubmed	Y	Less 50 patients
Long distance road transport of a patient with Wegener's Granulomatosis and respiratory failure using extracorporeal membrane oxygenation.	Rosengarten A, Elmore P, Epstein J.	Emerg Med (Fremantle). 2002 Jun;14(2):181-7.	2002	pubmed	Y	Less 50 patients
[Treatment of severe respiratory failure with cardiopulmonary extracorporeal assistance. A clinical case].	Castillo L, Velasco S, IrarrÃ¡zabal MJ, Garayar B, HernÃ¡ndez G, CÃ³rdova S, Romero C, Bugedo G.	Rev Med Chil. 2002 May;130(5):545-50. Spanish.	2002	pubmed	Y	Less 50 patients
CT in the evaluation of patients on ECMO due to acute respiratory failure.	Lidegran M, PalmÃ©r K, Jorulf H, LindÃ©n V.	Pediatr Radiol. 2002 Aug;32(8):567-74. Epub 2002 Jun 21.	2002	pubmed	Y	Unable to find data
Hybrid management of aortic rupture and lung failure: pumpless extracorporeal lung assist and endovascular stent-graft.	Schmid FX, Philipp A, Link J, Zimmermann M, Birnbaum DE.	Ann Thorac Surg. 2002 May;73(5):1618-20.	2002	pubmed	Y	Less 50 patients
Extracorporal life support for pulmonary hemorrhage in children: a case series.	Kolovos NS, Schuerer DJ, Moler FW, Bratton SL, Swaniker F, Bartlett RH, Custer JR, Annich G.	Crit Care Med. 2002 Mar;30(3):577-80.	2002	pubmed	Y	Less 18yr
Eighth World Congress of Intensive and Critical Care Medicine, 28 October-1 November 2001, Sydney, Australia: Harm minimization and effective risk management.	Ramakrishnan N.	Crit Care. 2002 Feb;6(1):89-91. Epub 2001 Nov 28.	2002	pubmed	Y	No clinical data
[Veno-venous ECMO for the respiratory failure after coronary artery bypass grafting].	Fukushima Y, Ayabe T, Nakamura E, Yoshioka M, Matsuo Y, Onitsuka T.	Kyobu Geka. 2002 Mar;55(3):203-6. Japanese.	2002	pubmed	Y	Less 50 patients
Deaths from Chickenpox. Extracorporeal membrane oxygenation has important role.	Roberts N, Peek GJ, Jones N, Firmin RK, Elbourne D.	BMJ. 2002 Mar 9;324(7337):610-1. No abstract available.	2002	pubmed	Y	No Complications Reported
The EXIT procedure: experience and outcome in 31 cases.	Bouchard S, Johnson MP, Flake AW, Howell LJ, Myers LB, Adzick NS, Crombleholme TM.	J Pediatr Surg. 2002 Mar;37(3):418-26.	2002	pubmed	Y	Less 18yr
Bedside exclusion of clinically significant recirculation volume during venovenous ECMO using conventional blood gas analyses.	Locker GJ, Losert H, Schellongowski P, Thalhammer F, Knapp S, Laczika KF, Burgmann H, Staudinger T, Frass M, Muhm M.	J Clin Anesth. 2003 Sep;15(6):441-5.	2003	pubmed	Y	Less 50 patients
Recombinant activated factor VII for exsanguinating haemorrhage post bilateral lung transplantation for extra-corporeal lung support-dependent respiratory failure.	Lucey MA, Myburgh JA.	Anaesth Intensive Care. 2003 Aug;31(4):465-9.	2003	pubmed	Y	Less 18yr
Early administration of extracorporeal life support for near fatal asthma.	Leiba A, Bar-Yosef S, Bar-Dayan Y, Weiss Y, Segal E, Paret G, Vardi A.	Isr Med Assoc J. 2003 Aug;5(8):600-2. Review. No abstract available. Erratum in: Isr Med Assoc J. 2003 Sep;5(9):684.	2003	pubmed	Y	Less 50 patients
Extracorporeal life support for posttraumatic acute respiratory distress syndrome at a children's medical center.	Fortenberry JD, Meier AH, Pettignano R, Heard M, Chambliss CR, Wulkan M.	J Pediatr Surg. 2003 Aug;38(8):1221-6.	2003	pubmed	Y	Less 18yr
Impact of AMICAR on hemorrhagic complications of ECMO: a ten-year review.	Downard CD, Betit P, Chang RW, Garza JJ, Arnold JH, Wilson JM.	J Pediatr Surg. 2003 Aug;38(8):1212-6.	2003	pubmed	Y	Less 18yr
Primary use of the venovenous approach for extracorporeal membrane oxygenation in pediatric acute respiratory failure.	Pettignano R, Fortenberry JD, Heard ML, Labuz MD, Kesser KC, Tanner AJ, Wagoner SF, Heggen J.	Pediatr Crit Care Med. 2003 Jul;4(3):291-8.	2003	pubmed	Y	Less 18yr
Expanded application of extracorporeal membrane oxygenation in a pediatric surgery practice.	Langham MR Jr, Kays DW, Beierle EA, Chen MK, Stringfellow K, Talbert JL.	Ann Surg. 2003 Jun;237(6):766-72; discussion 772-4.	2003	pubmed	Y	Less 18yr
Survival of severe ARDS with five-organ system failure following burns and inhalation injury in a 15-year-old patient.	Cedidi C, Hierner R, Pichlmaier M, Forssmann WG, Meyer M.	Burns. 2003 Jun;29(4):389-94.	2003	pubmed	Y	Less 18yr
Dose-response characteristics during long-term inhalation of nitric oxide in patients with severe acute respiratory distress syndrome: a prospective, randomized, controlled study.	Gerlach H, Keh D, Semmerow A, Busch T, Lewandowski K, Pappert DM, Rossaint R, Falke KJ.	Am J Respir Crit Care Med. 2003 Apr 1;167(7):1008-15.	2003	pubmed	Y	No Complications Reported
Postoperative extracorporeal membrane oxygenation for severe intraoperative SIRS 10 h after multiple trauma.	Schupp M, Swanevelder JL, Peek GJ, Sosnowski AW, Spyt TJ.	Br J Anaesth. 2003 Jan;90(1):91-4.	2003	pubmed	Y	Less 50 patients
New technologies for respiratory assist.	Matheis G1.	Perfusion. 2003 Jul;18(4):245-51.	2003	Referenced	Y	Review / M-A
Extracorporeal membrane oxygenation for chickenpox pneumonia: a single institution's experience.	White RW1, Peek GJ, Jenkins DR, Killer HM, Firmin RK.	ASAIO J. 2003 Jul-Aug;49(4):378-82.	2003	Referenced	Y	Not available
Extracorporeal life support for severe acute respiratory distress syndrome in adults.	Hemmila MR, Rowe SA, Boules TN, Miskulin J, McGillicuddy JW, Schuerer DJ, Haft JW, Swaniker F, Arbabi S, Hirschl RB, Bartlett RH.	Ann Surg. 2004 Oct;240(4):595-605; discussion 605-7.	2004	pubmed	Y	V-A ECMO
Early enteral feedings in adults receiving venovenous extracorporeal membrane oxygenation.	Scott LK, Boudreaux K, Thaljeh F, Grier LR, Conrad SA.	JPEN J Parenter Enteral Nutr. 2004 Sep-Oct;28(5):295-300.	2004	pubmed	Y	Less 50 patients
Medium-term results of extracorporeal membrane oxygenation for severe acute lung injury after lung transplantation.	Dahlberg PS, Prekker ME, Herrington CS, Hertz MI, Park SJ.	J Heart Lung Transplant. 2004 Aug;23(8):979-84.	2004	pubmed	Y	Less 50 patients
Clinical results of extracorporeal membrane oxygenation (ECMO) support for acute respiratory failure: a comparison of a centrifugal pump ECMO with a roller pump ECMO.	Yamagishi T, Kunimoto F, Isa Y, Hinohara H, Morishita Y.	Surg Today. 2004;34(3):209-13.	2004	pubmed	Y	Less 50 patients
Pumpless extracorporeal lung assist in severe blunt chest trauma.	Brederlau J, Anetseder M, Wagner R, Roesner T, Philipp A, Greim C, Roewer N.	J Cardiothorac Vasc Anesth. 2004 Dec;18(6):777-9. No abstract available.	2004	pubmed	Y	Less 50 patients
Systemic hypertension associated with venovenous extracorporeal membrane oxygenation for pediatric respiratory failure.	Heggen JA, Fortenberry JD, Tanner AJ, Reid CA, Mizzell DW, Pettignano R.	J Pediatr Surg. 2004 Nov;39(11):1626-31.	2004	pubmed	Y	Less 18yr
Long-term pulmonary sequelae in children who were treated with extracorporeal membrane oxygenation for neonatal respiratory failure.	Hamutcu R, Nield TA, Garg M, Keens TG, Platzker AC.	Pediatrics. 2004 Nov;114(5):1292-6.	2004	pubmed	Y	Less 18yr
Non-ventilatory-based strategies in the management of acute respiratory distress syndrome.	Klein Y, Blackbourne L, Barquist ES.	J Trauma. 2004 Oct;57(4):915-24. Review. No abstract available.	2004	pubmed	Y	Review / M-A
Fentanyl patch abuse: naloxone complications and extracorporeal membrane oxygenation rescue.	Pizon AF, Brooks DE.	Vet Hum Toxicol. 2004 Oct;46(5):256-7.	2004	pubmed	Y	Less 50 patients
Extracorporeal life support in pulmonary failure after traumatic rupture of the thoracic aorta: a case report.	Masroor S, Tehrani H, Pham S, Neijman T, Martinez-Ruiz R, McKenney M, Salerno T.	J Trauma. 2004 Aug;57(2):389-91. No abstract available.	2004	pubmed	Y	Less 50 patients
High-frequency oscillatory ventilation and an interventional lung assist device to treat hypoxaemia and hypercapnia.	David M, Heinrichs W.	Br J Anaesth. 2004 Oct;93(4):582-6. Epub 2004 Jul 26.	2004	pubmed	Y	Less 50 patients
Successful therapy of severe pneumonia-associated ARDS after pneumonectomy with ECMO and steroids.	DÃ¼nser M, Hasibeder W, Rieger M, Mayr AJ.	Ann Thorac Surg. 2004 Jul;78(1):335-7.	2004	pubmed	Y	Less 50 patients
[Pumpless extracorporeal lung assist using arterio-venous shunt in severe ARDS. Experience with 30 cases].	Bein T, Prasser C, Philipp A, MÃ¼ller T, Weber F, Schlitt HJ, Schmid FX, Taeger K, Birnbaum D.	Anaesthesist. 2004 Sep;53(9):813-9. German.	2004	pubmed	Y	Not english
[Swedish experiences with ECMO--treatment with an artificial lung].	Frenckner B, FrisÃ©n G, PalmÃ©r P, LindÃ©n V.	Lakartidningen. 2004 Apr 1;101(14):1272-5, 1278-9. Swedish.	2004	pubmed	Y	Not english
Extracorporeal membrane oxygenation support of the Fontan and bidirectional Glenn circulations.	Booth KL, Roth SJ, Thiagarajan RR, Almodovar MC, del Nido PJ, Laussen PC.	Ann Thorac Surg. 2004 Apr;77(4):1341-8.	2004	pubmed	Y	V-A ECMO
[Treatment of acute respiratory distress syndrome in a treatment center. Success is dependent on risk factors].	Henzler D, Dembinski R, Kopp R, Hawickhorst R, Rossaint R, Kuhlen R.	Anaesthesist. 2004 Mar;53(3):235-43. German.	2004	pubmed	Y	Not english
Development of the oxygenator: past, present, and future.	Iwahashi H1, Yuri K, Nosé Y	J Artif Organs. 2004;7(3):111-20.	2004	Referenced	Y	Review / M-A
Experience with the Jostra Rotaflow and QuadroxD oxygenator for ECMO.	Horton S1, Thuys C, Bennett M, Augustin S, Rosenberg M, Brizard C.	Perfusion. 2004 Jan;19(1):17-23.	2004	Referenced	Y	Not available
Successful use of ECMO in adults with life-threatening infections.	MacLaren G1, Pellegrino V, Butt W, Preovolos A, Salamonsen R	Anaesth Intensive Care. 2004 Oct;32(5):707-10.	2004	Referenced	Y	Less 50 patients
Use of extracorporeal membrane oxygenation (ECMO) during whole lung lavage in pulmonary alveolar proteinosis associated with lung cancer.	Kim KH1, Kim JH, Kim YW.	Eur J Cardiothorac Surg. 2004 Nov;26(5):1050-1.	2004	Referenced	Y	Less 50 patients
Pump-induced haemolysis: a comparison of short-term ventricular assist devices.	Bennett M1, Horton S, Thuys C, Augustin S, Rosenberg M, Brizard C.	Perfusion. 2004 Mar;19(2):107-11.	2004	Referenced	Y	No clinical data
Chest and abdominal CT during extracorporeal membrane oxygenation: Clinical benefits in diagnosis and treatment.	Lidegran MK, Ringertz HG, Frenckner BP, LindÃ©n VB.	Acad Radiol. 2005 Mar;12(3):276-85.	2005	pubmed	Y	Less 50 patients
Poly-methyl pentene oxygenators have improved gas exchange capability and reduced transfusion requirements in adult extracorporeal membrane oxygenation.	Khoshbin E1, Roberts N, Harvey C, Machin D, Killer H, Peek GJ, Sosnowski AW, Firmin RK.	ASAIO J. 2005 May-Jun;51(3):281-7.	2005	Referenced	Y	Less 50 patients
Poly-methyl pentene oxygenators have improved gas exchange capability and reduced transfusion requirements in adult extracorporeal membrane oxygenation.	Khoshbin E1, Roberts N, Harvey C, Machin D, Killer H, Peek GJ, Sosnowski AW, Firmin RK.	ASAIO J. 2005 May-Jun;51(3):281-7.	2005	Referenced	Y	Less 50 patients
Improved results treating lung allograft failure with venovenous extracorporeal membrane oxygenation.	Hartwig MG1, Appel JZ 3rd, Cantu E 3rd, Simsir S, Lin SS, Hsieh CC, Walczak R, Palmer SM, Davis RD Jr.	Ann Thorac Surg. 2005 Nov;80(5):1872-9;	2005	Referenced	Y	Less 50 patients
[Addition of an arterio-venous shunt during veno-arterial extracorporeal life support in a patient with Hantavirus pulmonary syndrome].	Tomicic V, Espinoza M, Torres J, Abarca J, Montes JM, Luppi M, Concha A, Reynolds E, Laporte A, Canals C, Vial P.	Rev Med Chil. 2005 Jul;133(7):817-22. Epub 2005 Aug 26. Spanish.	2005	pubmed	Y	Less 50 patients
Right heart bypass for acute traumatic respiratory distress syndrome.	Chiu KM, Li SJ, Hung FM, Chu SH, Tzu-Yulin.	ASAIO J. 2005 Nov-Dec;51(6):826-8. No abstract available.	2005	pubmed	Y	Less 50 patients
Extracorporeal membrane oxygenation with lepirudin anticoagulation for Wegener's granulomatosis with heparin-induced thrombocytopenia.	Balasubramanian SK, Tiruvoipati R, Chatterjee S, Sosnowski A, Firmin RK.	ASAIO J. 2005 Jul-Aug;51(4):477-9.	2005	pubmed	Y	Less 50 patients
[Severe ARDS following perioperative aspiration of gastric content associated with the use of a ProSeal" laryngeal mask airway]."	Putzke C, Max M, Geldner G, Wulf H.	Anasthesiol Intensivmed Notfallmed Schmerzther. 2005 Aug;40(8):487-9. German.	2005	pubmed	Y	Less 50 patients
Critical care challenges in the adult ECMO patient.	Gay SE, Ankney N, Cochran JB, Highland KB.	Dimens Crit Care Nurs. 2005 Jul-Aug;24(4):157-62; quiz 163-4.	2005	pubmed	Y	No clinical data
Craniotomy during ECMO in a severely traumatized patient.	Friesenecker BE, Peer R, Rieder J, Lirk P, Knotzer H, Hasibeder WR, Mayr AJ, DÃ¼nser MW.	Acta Neurochir (Wien). 2005 Sep;147(9):993-6; discussion 996. Epub 2005 Jul 15.	2005	pubmed	Y	Less 50 patients
Pushing the boundaries for the use of ECMO in acute hypoxic respiratory failure.	Bohn D.	Intensive Care Med. 2005 Jul;31(7):896-7. Epub 2005 Jun 18. No abstract available.	2005	pubmed	Y	Review / M-A
Update on extracorporeal life support 2004.	Dalton HJ, Rycus PT, Conrad SA.	Semin Perinatol. 2005 Feb;29(1):24-33. Review.	2005	pubmed	Y	ELSO db
Oxygenation index predicts outcome in children with acute hypoxemic respiratory failure.	Trachsel D, McCrindle BW, Nakagawa S, Bohn D.	Am J Respir Crit Care Med. 2005 Jul 15;172(2):206-11. Epub 2005 Apr 7.	2005	pubmed	Y	Less 18yr
Combination of sildenafil and bosentan for nitric oxide withdrawal.	Behrends M, Beiderlinden M, Peters J.	Eur J Anaesthesiol. 2005 Feb;22(2):155-7. No abstract available.	2005	pubmed	Y	Less 50 patients
Extracorporeal membrane oxygenation and CO2 removal in an adult after near drowning.	Peralta R, Ryan DP, Iribrane A, Fitzsimons MG.	J Extra Corpor Technol. 2005 Mar;37(1):71-4.	2005	pubmed	Y	Less 50 patients
Bench-to-bedside review: Ventilator strategies to reduce lung injury -- lessons from pediatric and neonatal intensive care.	Vitali SH, Arnold JH.	Crit Care. 2005 Apr;9(2):177-83. Epub 2004 Nov 4. Review.	2005	pubmed	Y	Less 18yr
Extracorporeal Life Support Registry Report 2004.	Conrad SA, Rycus PT, Dalton H.	ASAIO J. 2005 Jan-Feb;51(1):4-10.	2005	pubmed	Y	ELSO db
Plasma leakage of oxygenators in ECMO depends on the type of oxygenator and on patient variables.	Meyns B, Vercaemst L, Vandezande E, Bollen H, Vlasselaers D.	Int J Artif Organs. 2005 Jan;28(1):30-4.	2005	pubmed	Y	V-A ECMO
Extracorporeal membrane oxygenation after stem cell transplant: clinical decision-making in the absence of evidence.	Wolfson RK, Kahana MD, Nachman JB, Lantos J.	Pediatr Crit Care Med. 2005 Mar;6(2):200-3.	2005	pubmed	Y	Less 18yr
[The present role of interventional lung assist (ILA) in critical care medicine].	Brederlau J, Anetseder M, Muellenbach R, Wurmb T, Schwemmer U, Roewer N.	Anasthesiol Intensivmed Notfallmed Schmerzther. 2005 Feb;40(2):74-8. Review. German.	2005	pubmed	Y	Not english
Extra corporeal membrane oxygenation and plasmapheresis for pulmonary hemorrhage in microscopic polyangiitis.	Agarwal HS, Taylor MB, Grzeszczak MJ, Lovvorn HN, Hunley TE, Jabs K, Shankar V.	Pediatr Nephrol. 2005 Apr;20(4):526-8. Epub 2005 Feb 16.	2005	pubmed	Y	Less 50 patients
Successful management of adult smoke inhalation with extracorporeal membrane oxygenation.	Thompson JT, Molnar JA, Hines MH, Chang MC, Pranikoff T.	J Burn Care Rehabil. 2005 Jan-Feb;26(1):62-6.	2005	pubmed	Y	Less 50 patients
Conservative treatment of tracheal injuries.	Beiderlinden M, Adamzik M, Peters J.	Anesth Analg. 2005 Jan;100(1):210-4.	2005	pubmed	Y	Less 50 patients
Extracorporeal membrane oxygenation.	Mielck F1, Quintel M.	Curr Opin Crit Care. 2005 Feb;11(1):87-93.	2005	Referenced	Y	Review / M-A
A polymethylpentene fiber gas exchanger for long-term extracorporeal life support.	Toomasian JM1, Schreiner RJ, Meyer DE, Schmidt ME, Hagan SE, Griffith GW, Bartlett RH, Cook KE	ASAIO J. 2005 Jul-Aug;51(4):390-7.	2005	Referenced	Y	No clinical data
A new pumpless extracorporeal interventional lung assist in critical hypoxemia/hypercapnia.	Bein T, Weber F, Philipp A, Prasser C, Pfeifer M, Schmid FX, Butz B, Birnbaum D, Taeger K, Schlitt HJ.	Crit Care Med. 2006 May;34(5):1372-7.	2006	pubmed	Y	AV or Mixed ECCO2R
Treatment of severe acute respiratory distress syndrome: role of extracorporeal gas exchange.	Beiderlinden M, Eikermann M, Boes T, Breitfeld C, Peters J.	Intensive Care Med. 2006 Oct;32(10):1627-31. Epub 2006 Jul 28.	2006	pubmed	Y	Less 50 patients
Traumatic lung injury treated by extracorporeal membrane oxygenation (ECMO).	Cordell-Smith JA, Roberts N, Peek GJ, Firmin RK.	Injury. 2006 Jan;37(1):29-32. Epub 2005 Oct 21.	2006	pubmed	Y	Less 50 patients
Bridge to lung transplantation with the novel pumpless interventional lung assist device NovaLung.	Fischer S1, Simon AR, Welte T, Hoeper MM, Meyer A, Tessmann R, Gohrbandt B, Gottlieb J, Haverich A, Strueber M.	J Thorac Cardiovasc Surg. 2006 Mar;131(3):719-23	2006	Referenced	Y	Less 50 patients
Interhospital transportation of patients with severe lung failure on pumpless extracorporeal lung assist.	Zimmermann M, Bein T, Philipp A, Ittner K, Foltan M, Drescher J, Weber F, Schmid FX.	Br J Anaesth. 2006 Jan;96(1):63-6. Epub 2005 Nov 18.	2006	pubmed	Y	Less 50 patients
CESAR: conventional ventilatory support vs extracorporeal membrane oxygenation for severe adult respiratory failure.	Peek GJ, Clemens F, Elbourne D, Firmin R, Hardy P, Hibbert C, Killer H, Mugford M, Thalanany M, Tiruvoipati R, Truesdale A, Wilson A.	BMC Health Serv Res. 2006 Dec 23;6:163.	2006	pubmed	Y	No clinical data
Extracorporeal membrane oxygenation in pregnancy.	Cunningham JA, Devine PC, Jelic S.	Obstet Gynecol. 2006 Sep;108(3 Pt 2):792-5. Review.	2006	pubmed	Y	Less 50 patients
The history of extracorporeal oxygenators.	Lim MW.	Anaesthesia. 2006 Oct;61(10):984-95.	2006	pubmed	Y	Review / M-A
[Polytrauma with severe lung contusion. Early use of extracorporeal membrane oxygenation].	Sobottke R, Friese J, Ozokyay L, Muhr G, Wick M.	Unfallchirurg. 2006 Sep;109(9):805-8. German.	2006	pubmed	Y	Less 50 patients
An update on interventional lung assist devices and their role in acute respiratory distress syndrome.	von Mach MA, Kaes J, Omogbehin B, Sagoschen I, Wiechelt J, Kaiser K, Sauer O, Weilemann LS.	Lung. 2006 May-Jun;184(3):169-75. Review.	2006	pubmed	Y	Less 50 patients
[Extracorporeal membrane oxygenation for severe respiratory failure during thoracic aortic aneurysm repair].	Shimomura T, Toyama M, Takagi Y, Yokomi N, Hiramatsu Y, Higashi H, Kono S.	Kyobu Geka. 2006 Jul;59(7):551-4. Japanese.	2006	pubmed	Y	Less 50 patients
[Difficult placement of a pulmonary artery catheter due to a persistent left vena cava superior].	Treschan TA, Plicht B, Buck T, Beiderlinden M, Peters J.	Anaesthesist. 2006 Sep;55(9):950-2, 954. German.	2006	pubmed	Y	Less 50 patients
One day from dyspnea to death--unsuccessful application of extracorporeal membrane oxygenation in toxoplasma myocarditis following bone marrow transplantation.	Hadem J, SchrÃ¶der F, Winkler T, Gohrbandt B, Fischer D, Korte T, Drexler H.	Clin Res Cardiol. 2006 Sep;95(9):477-81. Epub 2006 Jun 20. No abstract available.	2006	pubmed	Y	Less 50 patients
Prolonged extracorporeal membrane oxygenation support for acute respiratory distress syndrome.	Ko WJ, Hsu HH, Tsai PR.	J Formos Med Assoc. 2006 May;105(5):422-6.	2006	pubmed	Y	Less 50 patients
Respiratory failure of two sp gastric bypass patients and subsequent rescue with extracorporeal membrane oxygenation.	Mongero LB, Beck JR, Charette KA, Stewart A.	Perfusion. 2006 Jan;21(1):73-6.	2006	pubmed	Y	Less 50 patients
Venovenous extracorporeal membrane oxygenation as an adjunct to surgery for empyema: report of a case.	Jotoku H, Sugimoto S, Usui A, Tanaka A, Makise H.	Surg Today. 2006;36(1):76-8.	2006	pubmed	Y	Less 50 patients
Management of acute respiratory distress syndrome using pumpless extracorporeal lung assist.	Ruettimann U, Ummenhofer W, Rueter F, Pargger H.	Can J Anaesth. 2006 Jan;53(1):101-5.	2006	pubmed	Y	Less 18yr
Extended use of extracorporeal membrane oxygenation after lung transplantation.	Mason DP1, Boffa DJ, Murthy SC, Gildea TR, Budev MM, Mehta AC, McNeill AM, Smedira NG, Feng J, Rice TW, Blackstone EH, Pettersson BG.	J Thorac Cardiovasc Surg. 2006 Oct;132(4):954-60.	2006	Referenced	Y	V-A ECMO
Acute lung injury and acute respiratory distress syndrome: extracorporeal life support and liquid ventilation for severe acute respiratory distress syndrome in adults.	Brown JK1, Haft JW, Bartlett RH, Hirschl RB.	Semin Respir Crit Care Med. 2006 Aug;27(4):416-25.	2006	Referenced	Y	Review / M-A
Extracorporeal support and patient outcome: credible causality remains elusive	Morris AH.	Crit Care Med. 2006 May;34(5):1551-2.	2006	Referenced	Y	No clinical data
pH 48 h after onset of extracorporeal membrane oxygenation is an independent predictor of survival in patients with respiratory failure.	Rega FR, Evrard V, Bollen H, Peeters G, Vercaemst L, Meuris B, Herijgers P, Sergeant P, Hermans G, Vlasselaers D, Meyns B.	Artif Organs. 2007 May;31(5):384-9.	2007	pubmed	Y	Less 50 patients
Argatroban in extracorporeal membrane oxygenation.	Beiderlinden M, Treschan T, GÃ¶rlinger K, Peters J.	Artif Organs. 2007 Jun;31(6):461-5.	2007	pubmed	Y	Less 50 patients
[Mechanical ventilation in Acute Lung Injury (ALI)/Acute Respiratory Discomfort Syndrome (ARDS)].	Amato MB, Carvalho CR, Isola A, Vieira S, Rotman V, Moock M, JosÃ© A, Franca S.	J Bras Pneumol. 2007;33 Suppl 2S:S119-27. Portuguese. No abstract available.	2007	pubmed	Y	Review / M-A
A potentially preventable case of serious influenza infection in a pregnant patient.	Parkins MD, Fonseca K, Peets AD, Laupland KB, Shamseddin K, Gill MJ.	CMAJ. 2007 Oct 9;177(8):851-3. No abstract available.	2007	pubmed	Y	Less 18yr
Extracorporeal membrane oxygenation for refractory septic shock in children: one institution's experience.	Maclaren G, Butt W, Best D, Donath S, Taylor A.	Pediatr Crit Care Med. 2007 Sep;8(5):447-51.	2007	pubmed	Y	V-A ECMO
Extracorporeal membrane oxygenation in severe acute respiratory failure in postpartum woman with rheumatic mitral valve disease: benefit, factors furthering the success of this procedure, and review of the literature.	Fayad G, Larrue B, Modine T, Azzaoui R, Regnault A, Koussa M, Gourlay T, Fourrier F, Decoene C, Warembourg H.	J Extra Corpor Technol. 2007 Jun;39(2):112-6. Review.	2007	pubmed	Y	Less 50 patients
[High-frequency ventilation in children and adolescents with acute respiratory distress syndrome (impact on the use of ECMO)].	Faria LS, Arneiro AH, Troster EJ.	Rev Assoc Med Bras. 2007 May-Jun;53(3):223-8. Review. Portuguese.	2007	pubmed	Y	Review / M-A
Extracorporeal membrane oxygenator as a bridge to successful surgical repair of bronchopleural fistula following bilateral sequential lung transplantation: a case report and review of literature.	Khan NU, Al-Aloul M, Khasati N, Machaal A, Leonard CT, Yonan N.	J Cardiothorac Surg. 2007 Jun 5;2:28. Review.	2007	pubmed	Y	Less 50 patients
Extracorporeal membrane oxygenation: experience in an adult medical ICU.	Hermans G, Meersseman W, Wilmer A, Meyns B, Bobbaers H.	Thorac Cardiovasc Surg. 2007 Jun;55(4):223-8.	2007	pubmed	Y	Less 50 patients
Extracorporeal membrane oxygenation in respiratory failure for pulmonary contusion and bronchial disruption after trauma.	Campione A, Agostini M, Portolan M, Alloisio A, Fino C, Vassallo G.	J Thorac Cardiovasc Surg. 2007 Jun;133(6):1673-4. No abstract available.	2007	pubmed	Y	Less 18yr
From Baghdad to Germany: use of a new pumpless extracorporeal lung assist system in two severely injured US soldiers.	Zimmermann M, Philipp A, Schmid FX, Dorlac W, Arlt M, Bein T.	ASAIO J. 2007 May-Jun;53(3):e4-6.	2007	pubmed	Y	Less 50 patients
Application of ECMO in multitrauma patients with ARDS as rescue therapy.	Madershahian N, Wittwer T, Strauch J, Franke UF, Wippermann J, Kaluza M, Wahlers T.	J Card Surg. 2007 May-Jun;22(3):180-4.	2007	pubmed	Y	Less 50 patients
Successful use of extracorporeal membrane oxygenation in severe necrotizing pneumonia caused by Staphylococcus aureus.	Stroud MH, Okhuysen-Cawley R, Jaquiss R, Berlinski A, Fiser RT.	Pediatr Crit Care Med. 2007 May;8(3):282-7.	2007	pubmed	Y	Less 18yr
Pediatric emergency medicine: legal briefs.	[No authors listed]	Pediatr Emerg Care. 2007 Mar;23(3):190-2. No abstract available.	2007	pubmed	Y	Less 18yr
Extracorporeal membrane oxygenation and sepsis.	Maclaren G, Butt W.	Crit Care Resusc. 2007 Mar;9(1):76-80. Review.	2007	pubmed	Y	Review / M-A
Pumpless extracorporeal carbon dioxide removal for life-threatening asthma.	Elliot SC, Paramasivam K, Oram J, Bodenham AR, Howell SJ, Mallick A.	Crit Care Med. 2007 Mar;35(3):945-8.	2007	pubmed	Y	Less 50 patients
Managing a rare condition presenting with intractable hypoxemic respiratory failure.	Dexter ME, Cosgrove GP, Douglas IS.	Chest. 2007 Jan;131(1):320-7. No abstract available.	2007	pubmed	Y	Less 50 patients
Cranial CT for diagnosis of intracranial complications in adult and pediatric patients during ECMO: Clinical benefits in diagnosis and treatment.	Lidegran MK, Mosskin M, Ringertz HG, Frenckner BP, LindÃ©n VB.	Acad Radiol. 2007 Jan;14(1):62-71.	2007	pubmed	Y	Less 18yr
Extracorporeal carbon dioxide removal using the Novalung in a patient with intracranial bleeding.	Mallick A, Elliot S, McKinlay J, Bodenham A.	Anaesthesia. 2007 Jan;62(1):72-4.	2007	pubmed	Y	Less 50 patients
Versatile use of extra-corporeal life support to resuscitate acute respiratory distress patients.	Huang YK, Tsai FC, Tseng CN, Wang YC, Chang YS, Chu JJ, Lin PJ.	Int J Clin Pract. 2007 Apr;61(4):589-93. Epub 2006 Jun 2.	2007	pubmed	Y	V-A ECMO
Bridge to lung transplantation with the extracorporeal membrane ventilator Novalung in the veno-venous mode: the initial Hannover experience.	Fischer S, Hoeper MM, Tomaszek S, Simon A, Gottlieb J, Welte T, Haverich A, Strueber M.	ASAIO J. 2007 Mar-Apr;53(2):168-70.	2007	Referenced	Y	Less 50 patients
A comparison of radiographic signs of pulmonary inflammation during ECMO between silicon and poly-methyl pentene oxygenators.	Khoshbin E1, Dux AE, Killer H, Sosnowski AW, Firmin RK, Peek GJ.	Perfusion. 2007 Jan;22(1):15-21.	2007	Referenced	Y	Not available
Extracorporeal life support for massive pulmonary embolism.	Maggio P1, Hemmila M, Haft J, Bartlett R.	J Trauma. 2007 Mar;62(3):570-6.	2007	Referenced	Y	V-A ECMO
Pumpless extracorporeal lung assist for protective mechanical ventilation in experimental lung injury.	Dembinski R1, Hochhausen N, Terbeck S, Uhlig S, Dassow C, Schneider M, Schachtrupp A, Henzler D, Rossaint R, Kuhlen R.	Crit Care Med. 2007 Oct;35(10):2359-66.	2007	Referenced	Y	No clinical data
Early institution of extracorporeal membrane oxygenation for primary graft dysfunction after lung transplantation improves outcome.	Wigfield CH1, Lindsey JD, Steffens TG, Edwards NM, Love RB.	J Heart Lung Transplant. 2007 Apr;26(4):331-8.	2007	Referenced	Y	Not available
Extracorporeal membrane oxygenation for primary graft dysfunction after lung transplantation: analysis of the Extracorporeal Life Support Organization (ELSO) registry.	Fischer S1, Bohn D, Rycus P, Pierre AF, de Perrot M, Waddell TK, Keshavjee S.	J Heart Lung Transplant. 2007 May;26(5):472-7.	2007	Referenced	Y	ELSO db
Arteriovenous extracorporeal lung assist as integral part of a multimodal treatment concept: a retrospective analysis of 22 patients with ARDS refractory to standard care.	Muellenbach RM, Kredel M, Wunder C, KÃ¼stermann J, Wurmb T, Schwemmer U, Schuster F, Anetseder M, Roewer N, Brederlau J.	Eur J Anaesthesiol. 2008 Nov;25(11):897-904. doi: 10.1017/S0265021508004870. Epub 2008 Jul 29.	2008	pubmed	Y	Less 50 patients
Transportation of critically ill patients on extracorporeal membrane oxygenation.	Wagner K, Sangolt GK, Risnes I, Karlsen HM, Nilsen JE, Strand T, Stenseth LB, Svennevig JL.	Perfusion. 2008 Mar;23(2):101-6. doi: 10.1177/0267659108096261.	2008	pubmed	Y	Less 50 patients
Extrapulmonary ventilation for unresponsive severe acute respiratory distress syndrome after pulmonary resection.	Iglesias M, Martinez E, Badia JR, Macchiarini P.	Ann Thorac Surg. 2008 Jan;85(1):237-44; discussion 244.	2008	pubmed	Y	Less 50 patients
Extracorporeal membrane oxygenation.	Ayad O, Dietrich A, Mihalov L.	Emerg Med Clin North Am. 2008 Nov;26(4):953-9, ix. doi: 10.1016/j.emc.2008.07.010.	2008	pubmed	Y	Review / M-A
Bronchial fistulae in ARDS patients: management with an extracorporeal lung assist device.	Hommel M, Deja M, von Dossow V, Diemel K, Heidenhain C, Spies C, Weber-Carstens S.	Eur Respir J. 2008 Dec;32(6):1652-5. doi: 10.1183/09031936.00021008.	2008	pubmed	Y	Less 50 patients
Efficiency in extracorporeal membrane oxygenation-cellular deposits on polymethylpentene membranes increase resistance to blood flow and reduce gas exchange capacity.	Lehle K, Philipp A, Gleich O, Holzamer A, MÃ¼ller T, Bein T, Schmid C.	ASAIO J. 2008 Nov-Dec;54(6):612-7. doi: 10.1097/MAT.0b013e318186a807.	2008	pubmed	Y	No Complications Reported
Review of ECMO (extra corporeal membrane oxygenation) support in critically ill adult patients.	Marasco SF, Lukas G, McDonald M, McMillan J, Ihle B.	Heart Lung Circ. 2008;17 Suppl 4:S41-7. doi: 10.1016/j.hlc.2008.08.009. Epub 2008 Oct 29. Review.	2008	pubmed	Y	Review / M-A
Artificial lung: current perspectives.	Go T, Macchiarini P.	Minerva Chir. 2008 Oct;63(5):363-72. Review.	2008	pubmed	Y	Review / M-A
Is it possible to predict outcome in pulmonary ECMO? Analysis of pre-operative risk factors.	Wagner K, Risnes I, Abdelnoor M, Karlsen HM, Svennevig JL.	Perfusion. 2008 Mar;23(2):95-9. doi: 10.1177/0267659108096260.	2008	pubmed	Y	No Complications Reported
Acute lung failure during mechanical circulatory support.	Schweigmann U, Schwarz B, Velik-Salchner C, Hangler H, Cottogni M, Kilo J, Brunnemann J, Geiger R, Stein JI, FrÃ¼hwirth M, Neu N, Meierhofer C, Schermer E.	ASAIO J. 2008 Sep-Oct;54(5):551-3. doi: 10.1097/MAT.0b013e318184ee1d.	2008	pubmed	Y	Less 50 patients
Prolonged extracorporeal membrane oxygenation and circulatory support as bridge to lung transplant.	BroomÃ© M, PalmÃ©r K, ScherstÃ©n H, Frenckner B, Nilsson F.	Ann Thorac Surg. 2008 Oct;86(4):1357-60. doi: 10.1016/j.athoracsur.2008.03.053.	2008	pubmed	Y	Less 50 patients
Venovenous extracorporeal membrane oxygenation support for treatment of bilateral spontaneous pneumothorax.	Yanada M, Toda S.	Interact Cardiovasc Thorac Surg. 2008 Dec;7(6):1178-9. doi: 10.1510/icvts.2008.183806. Epub 2008 Aug 29.	2008	pubmed	Y	Less 50 patients
Predictors of outcome for children requiring respiratory extra-corporeal life support: implications for inclusion and exclusion criteria.	Pathan N, Ridout DA, Smith E, Goldman AP, Brown KL.	Intensive Care Med. 2008 Dec;34(12):2256-63. doi: 10.1007/s00134-008-1232-3. Epub 2008 Aug 1.	2008	pubmed	Y	Less 18yr
Enhanced fluid management with continuous venovenous hemofiltration in pediatric respiratory failure patients receiving extracorporeal membrane oxygenation support.	Hoover NG, Heard M, Reid C, Wagoner S, Rogers K, Foland J, Paden ML, Fortenberry JD.	Intensive Care Med. 2008 Dec;34(12):2241-7. doi: 10.1007/s00134-008-1200-y. Epub 2008 Jul 15.	2008	pubmed	Y	Less 18yr
Extracorporeal membrane oxygenation for cardiopulmonary failure in pediatric patients: is a second course justified?	Fisher JC, Stolar CJ, Cowles RA.	J Surg Res. 2008 Jul;148(1):100-8. doi: 10.1016/j.jss.2008.03.023. Epub 2008 Apr 10.	2008	pubmed	Y	Less 18yr
[Pumpless extracorporeal lung assist].	GÃ¶bÃ¶lÃ¶s L, Hejjel L, Imre J, Lindenmayer-G R, Wiebe K, Foltan M, Thrum A, Ugocsai P, TÃ³th Z, Farkasfalvi K, Sipos E, Kiss R, GyorimolnÃ¡r I, Philipp A.	Orv Hetil. 2008 Jun 29;149(26):1233-6. doi: 10.1556/OH.2008.28380. Hungarian.	2008	pubmed	Y	Not english
Extracorporeal life support for severe respiratory failure in children with immune compromised conditions.	Gupta M, Shanley TP, Moler FW.	Pediatr Crit Care Med. 2008 Jul;9(4):380-5. doi: 10.1097/PCC.0b013e318172d54d.	2008	pubmed	Y	Less 18yr
Clinical outcomes and experience of 20 pediatric patients treated with extracorporeal membrane oxygenation in Fuwai Hospital.	Zhao J, Liu J, Feng Z, Hu S, Liu Y, Sheng X, Li S, Wang X, Long C.	ASAIO J. 2008 May-Jun;54(3):302-5. doi: 10.1097/MAT.0b013e318172b445.	2008	pubmed	Y	Less 18yr
Mechanical support for patients with fulminant acute myocarditis: strategy for biventricular failure and respiratory failure.	Sasaki H, Kawai A, Kurosawa H.	J Card Surg. 2008 Sep-Oct;23(5):526-7. doi: 10.1111/j.1540-8191.2008.00602.x. Epub 2008 May 14.	2008	pubmed	Y	V-A ECMO
Methods of data collection and analysis for the economic evaluation alongside a national, multi-centre trial in the UK: conventional ventilation or ECMO for Severe Adult Respiratory Failure (CESAR).	Thalanany MM, Mugford M, Hibbert C, Cooper NJ, Truesdale A, Robinson S, Tiruvoipati R, Elbourne DR, Peek GJ, Clemens F, Hardy P, Wilson A; CESAR Trial Group.	BMC Health Serv Res. 2008 Apr 30;8:94. doi: 10.1186/1472-6963-8-94.	2008	pubmed	Y	No clinical data
[Refractory infectious ARDS: place of extracorporeal membrane oxygenation].	Rosamel P, Delannoy B, Jault V, Metton O, Dubien PY, Flamens C, Bastien O.	Ann Fr Anesth Reanim. 2008 May;27(5):446-9. doi: 10.1016/j.annfar.2008.02.007. Epub 2008 Apr 23. French.	2008	pubmed	Y	Less 50 patients
Use of extracorporeal membrane oxygenation as a bridge to primary lung transplant: 3 consecutive, successful cases and a review of the literature.	Jackson A, Cropper J, Pye R, Junius F, Malouf M, Glanville A.	J Heart Lung Transplant. 2008 Mar;27(3):348-52. doi: 10.1016/j.healun.2007.12.006. Review.	2008	pubmed	Y	Less 50 patients
Extracorporeal membrane oxygenation support improves survival of patients with severe Hantavirus cardiopulmonary syndrome.	Dietl CA, Wernly JA, Pett SB, Yassin SF, Sterling JP, Dragan R, Milligan K, Crowley MR.	J Thorac Cardiovasc Surg. 2008 Mar;135(3):579-84. doi: 10.1016/j.jtcvs.2007.11.020. Epub 2008 Jan 18.	2008	pubmed	Y	V-A ECMO
ECMO was lifesaving in a child with pulmonary aspiration.	Albek C, Andersen NE, Brandt B, Nielsen HB.	Paediatr Anaesth. 2008 Apr;18(4):355. doi: 10.1111/j.1460-9592.2008.02471.x. No abstract available.	2008	pubmed	Y	Less 18yr
[Extracorporeal lung support procedures (ECMO/iLA)].	Bein T, MÃ¼ller T, Weber-Carstens S.	Pneumologie. 2008 Mar;62(3):137-42. doi: 10.1055/s-2008-1038119. Epub 2008 Feb 11. German.	2008	pubmed	Y	Not english
Extracorporeal lung assist in the treatment of respiratory failure during mechanical circulatory support.	Velik-Salchner C, Margreiter J, Antretter H, Hoermann C, Schweigmann U, Mair P.	J Cardiothorac Vasc Anesth. 2008 Feb;22(1):111-4. doi: 10.1053/j.jvca.2006.12.007. Epub 2007 Mar 6. No abstract available.	2008	pubmed	Y	Less 50 patients
Successful treatment of an aggressive non-Hodgkin's lymphoma associated with acute respiratory insufficiency using extracorporeal membrane oxygenation.	Aboud A, Marx G, Sayer H, Gummert JF.	Interact Cardiovasc Thorac Surg. 2008 Feb;7(1):173-4. Epub 2007 Nov 28.	2008	pubmed	Y	Less 50 patients
Arteriovenous extracorporeal lung assist and high frequency oscillatory ventilation in post-traumatic acute respiratory distress syndrome.	Brederlau J, Anetseder M, Schoefinius A, Wurmb T, Muellenbach R, Kredel M, Schwemmer U, Zahn P, Thiel A, Roewer N.	J Trauma. 2008 Apr;64(4):E65-8. No abstract available.	2008	pubmed	Y	Less 50 patients
Extracorporeal membrane oxygenation: current clinical practice, coding, and reimbursement	Schuerer DJ1, Kolovos NS, Boyd KV, Coopersmith CM	Chest. 2008 Jul;134(1):179-84.	2008	Referenced	Y	Review / M-A
The role of extracorporeal membrane oxygenation for treatment of the adult respiratory distress syndrome: review and quantitative analysis.	Chalwin RP, Moran JL, Graham PL.	Anaesth Intensive Care 2008; 36:152–161.	2008	Referenced	Y	Review / M-A
Wang-Zwische double lumen cannula-toward a percutaneous and ambulatory paracorporeal artificial lung	Wang D1, Zhou X, Liu X, Sidor B, Lynch J, Zwischenberger JB.	ASAIO J. 2008 Nov-Dec;54(6):606-11	2008	Referenced	Y	No clinical data
Pumpless extracorporeal lung assist: a 10-year institutional experience.	Flörchinger B1, Philipp A, Klose A, Hilker M, Kobuch R, Rupprecht L, Keyser A, Pühler T, Hirt S, Wiebe K, Müller T, Langgartner J, Lehle K, Schmid C.	Ann Thorac Surg. 2008 Aug;86(2):410-7	2008	Referenced	Y	Less 18yr
Advances in extracorporeal ventilation.	Meyer A1, Strüber M, Fischer S.	Anesthesiol Clin. 2008 Jun;26(2):381-91, viii.	2008	Referenced	Y	Review / M-A
Extracorporeal lung membrane provides better lung protection than conventional treatment for severe postpneumonectomy noncardiogenic acute respiratory distress syndrome.	Iglesias M1, Jungebluth P, Petit C, Matute MP, Rovira I, Martínez E, Catalan M, Ramirez J, Macchiarini P.	J Thorac Cardiovasc Surg. 2008 Jun;135(6):1362-71. doi: 10.1016/j.jtcvs.2007.08.074.	2008	Referenced	Y	No clinical data
Interventional lung assist: a new concept of protective ventilation in bridge to lung transplantation.	Fischer S1, Hoeper MM, Bein T, Simon AR, Gottlieb J, Wisser W, Frey L, Van Raemdonck D, Welte T, Haverich A, Strueber M.	ASAIO J. 2008 Jan-Feb;54(1):3-10.	2008	Referenced	Y	Review / M-A
Extracorporeal membrane oxygenation for nonneonatal acute respiratory failure: the Massachusetts General Hospital experience from 1990 to 2008.	Nehra D, Goldstein AM, Doody DP, Ryan DP, Chang Y, Masiakos PT.	Arch Surg. 2009 May;144(5):427-32; discussion 432. doi: 10.1001/archsurg.2009.45.	2009	pubmed	Y	Unable to find data
Pumpless extracorporeal interventional lung assist in patients with acute respiratory distress syndrome: a prospective pilot study	Zimmermann M, Bein T, Arlt M, Philipp A, Rupprecht L, Mueller T, Lubnow M, Graf BM, Schlitt HJ.	Crit Care. 2009;13(1):R10	2009	Referenced	Y	AV or Mixed ECCO2R
Blood transfusion requirements and independent predictors of increased transfusion requirements among adult patients on extracorporeal membrane oxygenation -- a single centre experience.	Ang AL, Teo D, Lim CH, Leou KK, Tien SL, Koh MB.	Vox Sang. 2009 Jan;96(1):34-43. doi: 10.1111/j.1423-0410.2008.01110.x.	2009	pubmed	Y	Less 50 patients
Emergency use of extracorporeal membrane oxygenation in cardiopulmonary failure.	Arlt M, Philipp A, Zimmermann M, Voelkel S, Amann M, Bein T, MÃ¼ller T, Foltan M, Schmid C, Graf B, Hilker M.	Artif Organs. 2009 Sep;33(9):696-703. doi: 10.1111/j.1525-1594.2009.00860.x.	2009	pubmed	Y	Less 50 patients
Tidal volume lower than 6 ml/kg enhances lung protection: role of extracorporeal carbon dioxide removal.	Terragni PP, Del Sorbo L, Mascia L, Urbino R, Martin EL, Birocco A, Faggiano C, Quintel M, Gattinoni L, Ranieri VM.	Anesthesiology. 2009 Oct;111(4):826-35. doi: 10.1097/ALN.0b013e3181b764d2.	2009	pubmed	Y	Less 50 patients
['Acute respiratory distress syndrome' (ARDS) as a serious complication of influenza].	Fraaij PL, Houmes RJ, Geukers VM, Gesink-van der Veer BJ, Kneyber MC, Tibboel D.	Ned Tijdschr Geneeskd. 2009;153:A1640. Dutch.	2009	pubmed	Y	Not english
[Retrospective analysis of 100 patients managed by extracorporeal membrane oxygenation].	Yuan Y, Gao GD, Long C, Hei FL, Li JW, Yu K, Liu JP, Feng ZY, Zhao J, Hu SS, Xu JP, Chang Q, Liu YL, Wang X, Liu P.	Zhonghua Wai Ke Za Zhi. 2009 Dec 1;47(23):1798-800. Chinese.	2009	pubmed	Y	Not english
[Extracorporeal membrane oxygenation support in acute cardiorespiratory function failure patients after cardiac surgery].	Jia M, Hu WL, Zhou Y, Shao JJ, Yan XL, Song TY, Hou XT, Jia SJ, Meng X.	Zhonghua Wai Ke Za Zhi. 2009 Sep 15;47(18):1397-9. Chinese.	2009	pubmed	Y	Not english
[Bridge to lung transplantation with a novel pumpless lung assist device. Report of one case].	FernÃ¡ndez P, MuÃ±oz P, Fischer D, MÃ©ndez F, Florenzano M, ValdÃ©s S, Parada MT, Fica M, RodrÃ­guez P, DÃ­az R, Rufs J.	Rev Med Chil. 2009 Oct;137(10):1363-6. doi: /S0034-98872009001000013. Epub . Spanish.	2009	pubmed	Y	Less 50 patients
Extracorporeal membrane oxygenation for treating severe cardiac and respiratory disease in adults: Part 1--overview of extracorporeal membrane oxygenation.	Sidebotham D, McGeorge A, McGuinness S, Edwards M, Willcox T, Beca J.	J Cardiothorac Vasc Anesth. 2009 Dec;23(6):886-92. doi: 10.1053/j.jvca.2009.08.006. Review. No abstract available.	2009	pubmed	Y	Review / M-A
[Extracorporeal membrane oxygenation in Legionella pneumonia].	Uslu B, Steensen M.	Ugeskr Laeger. 2009 Nov 23;171(48):3537-8. Danish.	2009	pubmed	Y	Not english
H1N1 in pregnancy: the wound care team called to action.	Gustafson K.	Adv Skin Wound Care. 2009 Dec;22(12):542. doi: 10.1097/01.ASW.0000363476.33364.fb. No abstract available.	2009	pubmed	Y	Less 50 patients
[Difficult respiratory management in a patient with bilateral giant bullae].	Fujita A, Hashiba E, Takahira Y, Kitayama M, Tubo T, Hirota K.	Masui. 2009 Oct;58(10):1274-7. Japanese.	2009	pubmed	Y	Not english
Early extracorporeal life support as rescue therapy for severe acute respiratory distress syndrome after inhalation injury.	Nelson J, Cairns B, Charles A.	J Burn Care Res. 2009 Nov-Dec;30(6):1035-8. doi: 10.1097/BCR.0b013e3181bfb7fd.	2009	pubmed	Y	Less 50 patients
Extracorporeal membrane oxygenation in adults with severe respiratory failure: a multi-center database.	Brogan TV, Thiagarajan RR, Rycus PT, Bartlett RH, Bratton SL.	Intensive Care Med. 2009 Dec;35(12):2105-14. doi: 10.1007/s00134-009-1661-7. Epub 2009 Sep 22.	2009	pubmed	Y	ELSO db
Efficacy and economic assessment of conventional ventilatory support versus extracorporeal membrane oxygenation for severe adult respiratory failure (CESAR): a multicentre randomised controlled trial.	Peek GJ, Mugford M, Tiruvoipati R, Wilson A, Allen E, Thalanany MM, Hibbert CL, Truesdale A, Clemens F, Cooper N, Firmin RK, Elbourne D; CESAR trial collaboration.	Lancet. 2009 Oct 17;374(9698):1351-63. doi: 10.1016/S0140-6736(09)61069-2. Epub 2009 Sep 15. Erratum in: Lancet. 2009 Oct 17;374(9698):1330.	2009	pubmed	Y	Duplicate
Optimal time for initiating extracorporeal membrane oxygenation.	Haile DT, Schears GJ.	Semin Cardiothorac Vasc Anesth. 2009 Sep;13(3):146-53. doi: 10.1177/1089253209347924. Epub 2009 Aug 31. Review.	2009	pubmed	Y	Review / M-A
Update on safety equipment for extracorporeal life support (ECLS) circuits.	Riley JB, Scott PD, Schears GJ.	Semin Cardiothorac Vasc Anesth. 2009 Sep;13(3):138-45. doi: 10.1177/1089253209347895. Epub 2009 Aug 31. Review.	2009	pubmed	Y	Review / M-A
Extracorporeal life support: utilization, cost, controversy, and ethics of trying to save lives.	Crow S, Fischer AC, Schears RM.	Semin Cardiothorac Vasc Anesth. 2009 Sep;13(3):183-91. doi: 10.1177/1089253209347385. Epub 2009 Aug 26.	2009	pubmed	Y	Review / M-A
Extracorporeal membrane oxygenation using the TandemHeart System's catheters.	Herlihy JP, Loyalka P, Jayaraman G, Kar B, Gregoric ID.	Tex Heart Inst J. 2009;36(4):337-41.	2009	pubmed	Y	Less 50 patients
Computational design and in vitro characterization of an integrated maglev pump-oxygenator.	Zhang J, Taskin ME, Koert A, Zhang T, Gellman B, Dasse KA, Gilbert RJ, Griffith BP, Wu ZJ.	Artif Organs. 2009 Oct;33(10):805-17. doi: 10.1111/j.1525-1594.2009.00807.x. Epub 2009 Jul 22.	2009	pubmed	Y	No clinical data
Combined use of extracorporeal membrane oxygenation and activated protein C for severe acute respiratory distress syndrome and septic shock.	Lamarche Y, Cheung A, Walley KR, Dodek P.	J Thorac Cardiovasc Surg. 2009 Jul;138(1):246-7. doi: 10.1016/j.jtcvs.2008.05.030. Epub 2008 Aug 15. No abstract available.	2009	pubmed	Y	Less 50 patients
Case report: plasma leakage in a polymethylpentene oxygenator during extracorporeal life support.	Puis L, Ampe L, Hertleer R.	Perfusion. 2009 Jan;24(1):51-2. doi: 10.1177/0267659109106294.	2009	pubmed	Y	Less 50 patients
Extracorporeal membrane oxygenation support for 59 days without changing the ECMO circuit: a case of Legionella pneumonia.	Thiara AP, HÃ¸yland V, Norum H, Aasmundstad TA, Karlsen HM, Fiane AE, Geiran O.	Perfusion. 2009 Jan;24(1):45-7. doi: 10.1177/0267659109106297.	2009	pubmed	Y	Less 50 patients
Paracorporeal artificial lung circuit as a possibility for bridge to lung transplantation.	Puehler T, Philipp A, Schmid C.	Ann Thorac Surg. 2009 Jul;88(1):352; author reply 352-3. doi: 10.1016/j.athoracsur.2008.12.013. No abstract available.	2009	pubmed	Y	Less 50 patients
Extracorporeal membrane oxygenation: quo vadis?	Betit P.	Respir Care. 2009 Jul;54(7):948-57. Review.	2009	pubmed	Y	Review / M-A
Air transport of patients with severe lung injury: development and utilization of the Acute Lung Rescue Team.	Dorlac GR, Fang R, Pruitt VM, Marco PA, Stewart HM, Barnes SL, Dorlac WC.	J Trauma. 2009 Apr;66(4 Suppl):S164-71. doi: 10.1097/TA.0b013e31819cdf72.	2009	pubmed	Y	Less 50 patients
Efficacy of emergent percutaneous cardiopulmonary support in cardiac or respiratory failure: fight or flight?	Shinn SH, Lee YT, Sung K, Min S, Kim WS, Park PW, Ha YK.	Interact Cardiovasc Thorac Surg. 2009 Aug;9(2):269-73. doi: 10.1510/icvts.2008.194860. Epub 2009 May 8.	2009	pubmed	Y	V-A ECMO
How to replace an extracorporeal life support without interruption of the cardiopulmonary assistance.	Rubin S, Ali AN, Pages ON, Baehrel B.	Interact Cardiovasc Thorac Surg. 2009 Aug;9(2):311-3. doi: 10.1510/icvts.2009.202838. Epub 2009 May 8.	2009	pubmed	Y	Review / M-A
Extracorporeal membrane oxygenation for the management of respiratory failure caused by diffuse alveolar hemorrhage.	Guo Z, Li X, Jiang LY, Xu LF.	J Extra Corpor Technol. 2009 Mar;41(1):37-40.	2009	pubmed	Y	Less 50 patients
Respiratory failure at home after coronary artery bypass graft surgery requiring extracorporeal membrane oxygenation.	Doane M, Moitra VK.	J Cardiothorac Vasc Anesth. 2009 Dec;23(6):937-8. doi: 10.1053/j.jvca.2009.01.010. Epub 2009 Mar 5. No abstract available.	2009	pubmed	Y	Less 50 patients
ECMO in ARDS: a long-term follow-up study regarding pulmonary morphology and function and health-related quality of life.	LindÃ©n VB, Lidegran MK, FrisÃ©n G, Dahlgren P, Frenckner BP, Larsen F.	Acta Anaesthesiol Scand. 2009 Apr;53(4):489-95. doi: 10.1111/j.1399-6576.2008.01808.x. Epub 2009 Feb 18.	2009	pubmed	Y	No Complications Reported
Potential renal sequelae in survivors of hantavirus cardiopulmonary syndrome.	Pergam SA, Schmidt DW, Nofchissey RA, Hunt WC, Harford AH, Goade DE.	Am J Trop Med Hyg. 2009 Feb;80(2):279-85.	2009	pubmed	Y	V-A ECMO
Extracorporeal gas exchange.	Pesenti A, Zanella A, Patroniti N.	Curr Opin Crit Care. 2009 Feb;15(1):52-8. doi: 10.1097/MCC.0b013e3283220e1f. Review.	2009	pubmed	Y	Review / M-A
Evaluating cannulation strategies used during second courses of extracorporeal membrane oxygenation in a large cohort of pediatric patients.	Fisher JC, Stolar CJ, Cowles RA.	J Pediatr Surg. 2009 Jan;44(1):94-9. doi: 10.1016/j.jpedsurg.2008.10.017.	2009	pubmed	Y	Less 18yr
Pumpless extracorporeal removal of carbon dioxide combined with ventilation using low tidal volume and high positive end-expiratory pressure in a patient with severe acute respiratory distress syndrome.	Bein T, Zimmermann M, Hergeth K, Ramming M, Rupprecht L, Schlitt HJ, Slutsky AS.	Anaesthesia. 2009 Feb;64(2):195-8. doi: 10.1111/j.1365-2044.2008.05735.x.	2009	pubmed	Y	Less 50 patients
Outcomes using extracorporeal life support for adult respiratory failure due to status asthmaticus.	Mikkelsen ME, Woo YJ, Sager JS, Fuchs BD, Christie JD.	ASAIO J. 2009 Jan-Feb;55(1):47-52. doi: 10.1097/MAT.0b013e3181901ea5.	2009	pubmed	Y	ELSO db
Critically ill patients with 2009 influenza A(H1N1) infection in Canada.	Kumar A, Zarychanski R, Pinto R, Cook DJ, Marshall J, Lacroix J, Stelfox T, Bagshaw S, Choong K, Lamontagne F, Turgeon AF, Lapinsky S, Ahern SP, Smith O, Siddiqui F, Jouvet P, Khwaja K, McIntyre L, Menon K, Hutchison J, Hornstein D, Joffe A, Lauzier F, Singh J, Karachi T, Wiebe K, Olafson K, Ramsey C, Sharma S, Dodek P, Meade M, Hall R, Fowler RA; Canadian Critical Care Trials Group H1N1 Collabor…	JAMA. 2009 Nov 4;302(17):1872-9.	2009	Referenced	Y	Less 18yr
Use of extracorporeal membrane oxygenation during resection of tracheal papillomatosis.	Smith IJ1, Sidebotham DA, McGeorge AD, Dorman EB, Wilsher ML, Kolbe J.	Anesthesiology. 2009 Feb;110(2):427-9. doi: 10.1097/ALN.0b013e3181943288.	2009	Referenced	Y	Less 50 patients
Anticoagulation and coagulation management for ECMO.	Oliver WC1.	Semin Cardiothorac Vasc Anesth. 2009 Sep;13(3):154-75	2009	Referenced	Y	Review / M-A
Risk factors for nosocomial infection during extracorporeal membrane oxygenation.	Hsu MS1, Chiu KM, Huang YT, Kao KL, Chu SH, Liao CH.	J Hosp Infect. 2009 Nov;73(3):210-6	2009	Referenced	Y	V-A ECMO
Will CESAR answer the adult ECMO debate?	Zwischenberger JB1, Lynch JE.	Lancet. 2009 Oct 17;374(9698):1307-8	2009	Referenced	Y	No clinical data
Extracorporeal life support in post-traumatic respiratory distress patients.	Huang YK1, Liu KS, Lu MS, Wu MY, Tsai FC, Lin PJ.	Resuscitation. 2009 May;80(5):535-9.	2009	Referenced	Y	Not available
Management benefits and safety of computed tomography in patients undergoing extracorporeal membrane oxygenation therapy: experience of a single centre.	Jepson SL, Harvey C, Entwisle JJ, Peek GJ.	Clin Radiol. 2010 Nov;65(11):881-6. doi: 10.1016/j.crad.2010.05.007. Epub 2010 Sep 6.	2010	pubmed	Y	Less 50 patients
Combination of high frequency oscillatory ventilation and interventional lung assist in severe acute respiratory distress syndrome.	Lubnow M, Luchner A, Philipp A, Buchner S, Jeron A, Karagiannidis C, Bein T, Pawlik M, Jungbauer C, Schmid C, Riegger GA, Pfeifer M, MÃ¼ller T.	J Crit Care. 2010 Sep;25(3):436-44. doi: 10.1016/j.jcrc.2009.11.004. Epub 2010 Jan 15.	2010	pubmed	Y	Less 50 patients
Extracorporeal membrane oxygenation for pandemic H1N1 2009 respiratory failure.	Holzgraefe B, BroomÃ© M, KalzÃ©n H, Konrad D, PalmÃ©r K, Frenckner B.	Minerva Anestesiol. 2010 Dec;76(12):1043-51.	2010	pubmed	Y	Less 50 patients
The use of CO2 removal devices in patients awaiting lung transplantation: an initial experience.	Ricci D, Boffini M, Del Sorbo L, El Qarra S, Comoglio C, Ribezzo M, Bonato R, Ranieri VM, Rinaldi M.	Transplant Proc. 2010 May;42(4):1255-8. doi: 10.1016/j.transproceed.2010.03.117.	2010	pubmed	Y	Less 50 patients
Extracorporeal life support for management of refractory cardiac or respiratory failure: initial experience in a tertiary centre.	Peris A, Cianchi G, Biondi S, Bonizzoli M, Pasquini A, Bonacchi M, Ciapetti M, Zagli G, Bacci S, Lazzeri C, Bernardo P, Mascitelli E, Sani G, Gensini GF.	Scand J Trauma Resusc Emerg Med. 2010 May 21;18:28. doi: 10.1186/1757-7241-18-28.	2010	pubmed	Y	Less 50 patients
Evaluation of prognosis in patients with respiratory failure requiring venovenous extracorporeal membrane oxygenation (ECMO).	Oshima K, Kunimoto F, Hinohara H, Okawa M, Mita N, Kanemaru Y, Tajima Y, Saito S.	Ann Thorac Cardiovasc Surg. 2010 Jun;16(3):156-62.	2010	pubmed	Y	Less 50 patients
Initial experience with single cannulation for venovenous extracorporeal oxygenation in adults.	Bermudez CA, Rocha RV, Sappington PL, Toyoda Y, Murray HN, Boujoukos AJ.	Ann Thorac Surg. 2010 Sep;90(3):991-5. doi: 10.1016/j.athoracsur.2010.06.017.	2010	pubmed	Y	Less 50 patients
Rescue therapy in adult and pediatric patients with pH1N1 influenza infection: a tertiary center intensive care unit experience from April to October 2009.	Norfolk SG, Hollingsworth CL, Wolfe CR, Govert JA, Que LG, Cheifetz IM, Hollingsworth JW.	Crit Care Med. 2010 Nov;38(11):2103-7. doi: 10.1097/CCM.0b013e3181f268f1.	2010	pubmed	Y	Less 50 patients
Hong Kong's experience on the use of extracorporeal membrane oxygenation for the treatment of influenza A (H1N1).	Chan KK, Lee KL, Lam PK, Law KI, Joynt GM, Yan WW.	Hong Kong Med J. 2010 Dec;16(6):447-54.	2010	Referenced	Y	Less 50 patients
Extracorporeal membrane oxygenation for severe influenza A (H1N1) acute respiratory distress syndrome: a prospective observational comparative study.	Roch A, Lepaul-Ercole R, Grisoli D, Bessereau J, Brissy O, Castanier M, Dizier S, Forel JM, Guervilly C, Gariboldi V, Collart F, Michelet P, Perrin G, Charrel R, Papazian L.	Intensive Care Med. 2010 Nov;36(11):1899-905. doi: 10.1007/s00134-010-2021-3. Epub 2010 Aug 19.	2010	pubmed	Y	Less 50 patients
Extracorporeal membrane oxygenation in severe trauma patients with bleeding shock.	Arlt M, Philipp A, Voelkel S, Rupprecht L, Mueller T, Hilker M, Graf BM, Schmid C.	Resuscitation. 2010 Jul;81(7):804-9. doi: 10.1016/j.resuscitation.2010.02.020. Epub 2010 Apr 7.	2010	pubmed	Y	Less 50 patients
Extracorporeal lung support for patients who had severe respiratory failure secondary to influenza A (H1N1) 2009 infection in Canada.	Freed DH, Henzler D, White CW, Fowler R, Zarychanski R, Hutchison J, Arora RC, Manji RA, Legare JF, Drews T, Veroukis S, Kesselman M, Guerguerian AM, Kumar A; Canadian Critical Care Trials Group.	Can J Anaesth. 2010 Mar;57(3):240-7. doi: 10.1007/s12630-009-9253-0. Epub 2010 Jan 16.	2010	pubmed	Y	Less 50 patients
High frequency oscillation, extracorporeal membrane oxygenation and pumpless arteriovenous lung assist in the management of severe ARDS.	Banach M, Soukup J, Bucher M, Andres J.	Anestezjol Intens Ter. 2010 Oct-Dec;42(4):201-5.	2010	pubmed	Y	Less 50 patients
Cytotoxic therapy for severe swine flu A/H1N1.	Henter JI, Palmkvist-Kaijser K, Holzgraefe B, Bryceson YT, PalmÃ©r K.	Lancet. 2010 Dec 18;376(9758):2116. doi: 10.1016/S0140-6736(10)61345-1. No abstract available.	2010	pubmed	Y	Less 50 patients
Extracorporeal membrane oxygenation bridging to lung transplant complicated by heparin-induced thrombocytopenia.	Dolch ME, Frey L, Hatz R, Uberfuhr PA, Beiras-Fernandez A, Behr J, Irlbeck M, Lung Transplant Group TM.	Exp Clin Transplant. 2010 Dec;8(4):329-32.	2010	pubmed	Y	Less 50 patients
Emergency use of extracorporeal membrane oxygenation for a foreign body obstructing the airway.	Holliday T, Jackson A.	Crit Care Resusc. 2010 Dec;12(4):273-5.	2010	pubmed	Y	Less 50 patients
Therapies for refractory hypoxemia in acute respiratory distress syndrome.	Pipeling MR, Fan E.	JAMA. 2010 Dec 8;304(22):2521-7. doi: 10.1001/jama.2010.1752.	2010	pubmed	Y	Less 50 patients
H1N1-associated acute respiratory distress syndrome.	Narula T, Safley M, deBoisblanc BP.	Am J Med Sci. 2010 Dec;340(6):499-504. doi: 10.1097/MAJ.0b013e3181d94fa5.	2010	pubmed	Y	Less 50 patients
Use of extracorporeal technology during pandemics: ethical and staffing considerations.	Kissoon N, Bohn D.	Pediatr Crit Care Med. 2010 Nov;11(6):757-8. doi: 10.1097/PCC.0b013e3181e288a4. No abstract available.	2010	pubmed	Y	No clinical data
Extracorporeal life support.	Gaffney AM, Wildhirt SM, Griffin MJ, Annich GM, Radomski MW.	BMJ. 2010 Nov 2;341:c5317. doi: 10.1136/bmj.c5317. Review. No abstract available.	2010	pubmed	Y	Review / M-A
[Extracorporeal life support given to a 16-year-old girl with cystic fibrosis, candida pneumonia and acute respiratory distress syndrome].	Kuhl T, Langebartels G, Madershahian N, Wahlers T.	Dtsch Med Wochenschr. 2010 Oct;135(42):2071-5. doi: 10.1055/s-0030-1267483. Epub 2010 Oct 12. German.	2010	pubmed	Y	Less 50 patients
Factors associated with survival in pediatric extracorporeal membrane oxygenation--a single-center experience.	Mehta NM, Turner D, Walsh B, Zurakowski D, Betit P, Wilson J, Arnold JH.	J Pediatr Surg. 2010 Oct;45(10):1995-2003. doi: 10.1016/j.jpedsurg.2010.05.028.	2010	pubmed	Y	Less 18yr
Spontaneous delivery during veno-venous extracorporeal membrane oxygenation in swine influenza-related acute respiratory failure.	Kunstyr J, Lips M, Belohlavek J, Prskavec T, Mlejnsky F, Koucky M, Sebron V, Balik M.	Acta Anaesthesiol Scand. 2010 Oct;54(9):1154-5. doi: 10.1111/j.1399-6576.2010.02300.x. No abstract available.	2010	pubmed	Y	Less 50 patients
Extracorporeal life support.	Patton ML, Haith LR.	J Burn Care Res. 2010 Nov-Dec;31(6):965. doi: 10.1097/BCR.0b013e3181f93a9d. No abstract available.	2010	pubmed	Y	No clinical data
[Adult respiratory distress syndrome occurring during leptospirosis].	Vandroux D, Bouchet B, Bossard G, Leaute B, Alves T, Braunberger E.	Presse Med. 2010 Dec;39(12):1333-6. doi: 10.1016/j.lpm.2010.07.011. Epub 2010 Sep 17. French. No abstract available.	2010	pubmed	Y	Less 50 patients
[Elective use of extracorporeal lung assist: prevention of an airway disaster].	Hackner K, Bein T, Kuehnel T, Philipp A, Wittmann S, Graf BM.	Anaesthesist. 2010 Nov;59(11):1008-12. doi: 10.1007/s00101-010-1763-1. German.	2010	pubmed	Y	Not english
Pandemic (H1N1) 2009-associated ARDS rescued by neuraminidase inhibitors with emergency use of extracorporeal membrane oxygenation.	Nakanishi H, Muta T, Fujisaki T, Yoshitomi R, Kubo T, Yokota E.	Intern Med. 2010;49(17):1901-5. Epub 2010 Sep 1.	2010	pubmed	Y	Less 50 patients
Extracorporeal membrane oxygenation in a Scottish intensive care unit.	Berryman S.	Nurs Crit Care. 2010 Sep-Oct;15(5):262-8. doi: 10.1111/j.1478-5153.2010.00419.x.	2010	pubmed	Y	Less 50 patients
The successful use of extra-corporeal membrane oxygenation in the management of a pregnant woman with severe H1N1 2009 influenza complicated by pneumonitis and adult respiratory distress syndrome.	Robertson LC, Allen SH, Konamme SP, Chestnut J, Wilson P.	Int J Obstet Anesth. 2010 Oct;19(4):443-7. doi: 10.1016/j.ijoa.2010.04.010. Epub 2010 Aug 11.	2010	pubmed	Y	Less 50 patients
Double ECMO in severe ARDS: report of an outstanding case and literature review.	Litmathe J, Dapunt O.	Perfusion. 2010 Nov;25(6):363-7. doi: 10.1177/0267659110380771. Epub 2010 Aug 9.	2010	pubmed	Y	Less 50 patients
Autoregulation of ventilation with neurally adjusted ventilatory assist on extracorporeal lung support.	Karagiannidis C, Lubnow M, Philipp A, Riegger GA, Schmid C, Pfeifer M, Mueller T.	Intensive Care Med. 2010 Dec;36(12):2038-44. doi: 10.1007/s00134-010-1982-6. Epub 2010 Aug 6.	2010	pubmed	Y	No Complications Reported
Rescue a drowning patient by prolonged extracorporeal membrane oxygenation support for 117 days.	Wang CH, Chou CC, Ko WJ, Lee YC.	Am J Emerg Med. 2010 Jul;28(6):750.e5-7. doi: 10.1016/j.ajem.2009.11.011. Epub 2010 Apr 2.	2010	pubmed	Y	Less 50 patients
Extracorporeal membrane oxygenation in nonintubated patients as bridge to lung transplantation.	Olsson KM, Simon A, Strueber M, Hadem J, Wiesner O, Gottlieb J, Fuehner T, Fischer S, Warnecke G, KÃ¼hn C, Haverich A, Welte T, Hoeper MM.	Am J Transplant. 2010 Sep;10(9):2173-8. doi: 10.1111/j.1600-6143.2010.03192.x. Epub 2010 Jul 15.	2010	pubmed	Y	V-A ECMO
Clinical pathological characteristics and management of acute respiratory distress syndrome resulting from influenza A (H1N1) virus.	Homsi S, Milojkovic N, Homsi Y.	South Med J. 2010 Aug;103(8):786-90; quiz 791-2. doi: 10.1097/SMJ.0b013e3181e6ca0c. Review.	2010	pubmed	Y	Less 50 patients
Extracorporeal membrane oxygenation as a lifesaving modality in the treatment of pediatric patients with burns and respiratory failure.	Askegard-Giesmann JR, Besner GE, Fabia R, Caniano DA, Preston T, Kenney BD.	J Pediatr Surg. 2010 Jun;45(6):1330-5. doi: 10.1016/j.jpedsurg.2010.02.106.	2010	pubmed	Y	Less 18yr
['Acute respiratory distress syndrome' (ARDS) as a serious complication of influenza].	Fraaij PL, Houmes RJ, Geukers VM, Gesink-van der Veer BJ, Kneyber MC, Tibboel D.	Ned Tijdschr Geneeskd. 2010;154:A1640. Dutch.	2010	pubmed	Y	Not english
Single-institution experience with interhospital extracorporeal membrane oxygenation transport: A descriptive study.	Clement KC, Fiser RT, Fiser WP, Chipman CW, Taylor BJ, Heulitt MJ, Moss M, Fasules JW, Faulkner SC, Imamura M, Fontenot EE, Jaquiss RD.	Pediatr Crit Care Med. 2010 Jul;11(4):509-13. doi: 10.1097/PCC.0b013e3181c515ca.	2010	pubmed	Y	Less 18yr
Extracorporeal membrane oxygenation for diffuse alveolar hemorrhage and severe hypoxemic respiratory failure from silicone embolism.	Mongero LB, Brodie D, Cunningham J, Ventetuolo C, Kim H, Sylvan E, Bacchetta MD.	Perfusion. 2010 Jul;25(4):249-52; discussion 253-4. doi: 10.1177/0267659110375327. Epub 2010 Jun 21.	2010	pubmed	Y	Less 50 patients
Pandemic (H1N1) 2009 influenza, pregnancy and extracorporeal membrane oxygenation.	Welch SA, Snowden LN, Buscher H.	Med J Aust. 2010 Jun 7;192(11):668. No abstract available.	2010	pubmed	Y	Less 50 patients
Hospital readmissions and survival after nonneonatal pediatric ECMO.	Jen HC, Shew SB.	Pediatrics. 2010 Jun;125(6):1217-23. doi: 10.1542/peds.2009-0696. Epub 2010 May 17.	2010	pubmed	Y	Less 18yr
Extracorporeal life support for adults with malignancy and respiratory or cardiac failure: The Extracorporeal Life Support experience.	Gow KW, Lao OB, Leong T, Fortenberry JD.	Am J Surg. 2010 May;199(5):669-75. doi: 10.1016/j.amjsurg.2010.01.018.	2010	pubmed	Y	ELSO db
Novel pH1N1 viral cardiomyopathy requiring veno-venous extracorporeal membrane oxygenation.	Subramanian S, Clark JD, Jeffries HE, McMullan DM.	Pediatr Crit Care Med. 2010 Nov;11(6):714-7. doi: 10.1097/PCC.0b013e3181e327c9.	2010	pubmed	Y	Less 50 patients
Extracoporeal membrane oxygenation to rescue cardiopulmonary failure after heart transplantation: a single-center experience.	Chou NK, Chi NH, Wu IW, Huang SC, Chen YS, Yu HY, Tsao CI, Ko WJ, Chu SH, Wang SS.	Transplant Proc. 2010 Apr;42(3):943-5. doi: 10.1016/j.transproceed.2010.03.005.	2010	pubmed	Y	V-A ECMO
Prognostic factors for adult patients receiving extracorporeal membrane oxygenation as mechanical circulatory support--a 14-year experience at a medical center.	Lan C, Tsai PR, Chen YS, Ko WJ.	Artif Organs. 2010 Feb;34(2):E59-64. doi: 10.1111/j.1525-1594.2009.00909.x.	2010	pubmed	Y	V-A ECMO
A systematic review to inform institutional decisions about the use of extracorporeal membrane oxygenation during the H1N1 influenza pandemic.	Mitchell MD, Mikkelsen ME, Umscheid CA, Lee I, Fuchs BD, Halpern SD.	Crit Care Med. 2010 Jun;38(6):1398-404. doi: 10.1097/CCM.0b013e3181de45db. Review.	2010	pubmed	Y	Review / M-A
Rescue of cardiopulmonary collapse in anterior mediastinal tumor: case presentation and review of literature.	Huang YL, Yang MC, Huang CH, Wang CC, Wu ET, Huang SC, Jou ST, Chen JS, Ko WJ.	Pediatr Emerg Care. 2010 Apr;26(4):296-8. doi: 10.1097/PEC.0b013e3181d6daf0. Review.	2010	pubmed	Y	Less 50 patients
Oseltamivir carboxylate accumulation in a patient treated by haemodiafiltration and extracorporeal membrane oxygenation.	Lemaitre F, Luyt CE, Roullet-Renoleau F, Nieszkowska A, Zahr N, Fernandez C, Farinotti R, Combes A.	Intensive Care Med. 2010 Jul;36(7):1273-4. doi: 10.1007/s00134-010-1882-9. Epub 2010 Apr 8. No abstract available.	2010	pubmed	Y	Less 50 patients
[The use of extracorporeal membrane oxygenation in sustaining pulmonary function patients with influenza A H1N1].	Duan DW, Li T, Qin YZ, Xu L, Zhao CX, Hu XM, Wu P, Zhang Q, Lang YH.	Zhongguo Wei Zhong Bing Ji Jiu Yi Xue. 2010 Mar;22(3):161-3. Chinese.	2010	pubmed	Y	Not english
[Eighteen cases of 2009 influenza A H1N1 associated with respiratory failure in adults].	Sun JJ, Li C, Wu DW, Li CH, Qin WH, Li YL, Liu QY, Li JX, Zou YG, Huang DQ, Xie JJ, Li EJ.	Zhongguo Wei Zhong Bing Ji Jiu Yi Xue. 2010 Mar;22(3):156-60. Chinese.	2010	pubmed	Y	Not english
[The lung protection strategy under the support of extracorporeal membrane oxygenation in patients suffering from influenza A H1N1].	Xu L, Du ZZ, Gao XJ, Qin YZ, Li ZB.	Zhongguo Wei Zhong Bing Ji Jiu Yi Xue. 2010 Mar;22(3):150-2. Chinese.	2010	pubmed	Y	Not english
Serial use of an interventional lung assist device and a ventricular assist device.	Camboni D, Philipp A, Haneya A, Puehler T, Arlt M, Hilker M, Schmid FX, Schmid C.	ASAIO J. 2010 May-Jun;56(3):270-2. doi: 10.1097/MAT.0b013e3181cf06f8.	2010	pubmed	Y	Less 50 patients
ECMO in adults for severe respiratory failure finally comes of age: just in time?	Finney SJ, Cordingley JJ, Griffiths MJ, Evans TW.	Thorax. 2010 Mar;65(3):194-5. doi: 10.1136/thx.2009.127795. No abstract available.	2010	pubmed	Y	Review / M-A
Awake extracorporeal membrane oxygenation for management of critical distal tracheal obstruction.	Collar RM, Taylor JC, Hogikyan ND, Tutuo N, Ohye RG, Green GE.	Otolaryngol Head Neck Surg. 2010 Apr;142(4):618-20. doi: 10.1016/j.otohns.2009.10.031. No abstract available.	2010	pubmed	Y	Less 18yr
Ambulatory extracorporeal membrane oxygenation: a new approach for bridge-to-lung transplantation.	Garcia JP, Iacono A, Kon ZN, Griffith BP.	J Thorac Cardiovasc Surg. 2010 Jun;139(6):e137-9. doi: 10.1016/j.jtcvs.2009.12.021. Epub 2010 Mar 9. No abstract available.	2010	pubmed	Y	Less 50 patients
Extracorporeal membrane oxygenation for respiratory failure: comparison of venovenous versus venoarterial bypass.	Oshima K, Kunimoto F, Hinohara H, Ohkawa M, Mita N, Tajima Y, Saito S.	Surg Today. 2010 Mar;40(3):216-22. doi: 10.1007/s00595-008-4040-z. Epub 2010 Feb 24.	2010	pubmed	Y	No Complications Reported
Extracorporeal membrane oxygenation for cardiorespiratory failure in four patients with pandemic H1N1 2009 influenza virus and secondary bacterial infection.	Buckley E, Sidebotham D, McGeorge A, Roberts S, Allen SJ, Beca J.	Br J Anaesth. 2010 Mar;104(3):326-9. doi: 10.1093/bja/aep396. Epub 2010 Jan 29.	2010	pubmed	Y	Less 50 patients
Switch from venoarterial extracorporeal membrane oxygenation to arteriovenous pumpless extracorporeal lung assist.	Floerchinger B, Philipp A, Foltan M, Rupprecht L, Klose A, Camboni D, Bruenger F, Schopka S, Arlt M, Hilker M, Schmid C.	Ann Thorac Surg. 2010 Jan;89(1):125-31. doi: 10.1016/j.athoracsur.2009.09.007.	2010	pubmed	Y	V-A ECMO
[Clinical course of severe influenza-A/H1N1 infection with fulminant lung failure].	Alb M, Thiel M, Kalenka A.	Dtsch Med Wochenschr. 2010 Jan;135(1-2):40-2. doi: 10.1055/s-0029-1244816. Epub 2009 Dec 18. German. No abstract available.	2010	pubmed	Y	Not english
Lung transplantation following 107 days of extracorporeal membrane oxygenation.	Iacono A, Groves S, Garcia J, Griffith B.	Eur J Cardiothorac Surg. 2010 Apr;37(4):969-71. doi: 10.1016/j.ejcts.2009.09.039. Epub 2009 Nov 5.	2010	pubmed	Y	Less 50 patients
Recovery of multipotent progenitors from the peripheral blood of patients requiring extracorporeal membrane oxygenation support.	Bui KC, Senadheera D, Wang X, Hendrickson B, Friedlich P, Lutzko C.	Am J Respir Crit Care Med. 2010 Feb 1;181(3):226-37. doi: 10.1164/rccm.200812-1901OC. Epub 2009 Oct 29.	2010	pubmed	Y	No Complications Reported
Extracorporeal membrane oxygenation for treating severe cardiac and respiratory failure in adults: part 2-technical considerations.	Sidebotham D, McGeorge A, McGuinness S, Edwards M, Willcox T, Beca J.	J Cardiothorac Vasc Anesth. 2010 Feb;24(1):164-72. doi: 10.1053/j.jvca.2009.08.002. Epub 2009 Oct 28. Review. No abstract available.	2010	pubmed	Y	Review / M-A
Extracorporeal membrane oxygenation as a rescue therapy for leukaemic children with pulmonary failure.	Meister B, Zelger B, Kropshofer G, Klein-Franke A, Crazzolara R, FrÃ¼hwirth M, Neu N.	Br J Haematol. 2010 Jan;148(1):126-31. doi: 10.1111/j.1365-2141.2009.07924.x. Epub 2009 Oct 11.	2010	pubmed	Y	Less 50 patients
Acute respiratory distress syndrome after zinc chloride inhalation: survival after extracorporeal life support and corticosteroid treatment.	Chian CF, Wu CP, Chen CW, Su WL, Yeh CB, Perng WC.	Am J Crit Care. 2010 Jan;19(1):86-90. doi: 10.4037/ajcc2009908. Epub 2009 Mar 19.	2010	pubmed	Y	Less 50 patients
Should lung transplantation be performed for patients on mechanical respiratory support? The US experience.	Mason DP, Thuita L, Nowicki ER, Murthy SC, Pettersson GB, Blackstone EH.	J Thorac Cardiovasc Surg. 2010 Mar;139(3):765-773.e1.	2010	Referenced	Y	No Complications Reported
Bridge to lung transplantation using short-term ambulatory extracorporeal membrane oxygenation.	Mangi AA1, Mason DP, Yun JJ, Murthy SC, Pettersson GB.	J Thorac Cardiovasc Surg. 2010 Sep;140(3):713-5.	2010	Referenced	Y	Less 50 patients
Should we "rescue" patients with 2009 influenza A(H1N1) and lung injury from conventional mechanical ventilation?	Hubmayr RD, Farmer JC	Chest. 2010 Apr;137(4):745-7	2010	Referenced	Y	No Complications Reported
Counterpoint: Efficacy of extracorporeal membrane oxygenation in 2009 influenza A(H1N1): sufficient evidence?	Morris AH, Hirshberg E, Miller RR 3rd, Statler KD, Hite RD.	Chest. 2010 Oct;138(4):778-81;	2010	Referenced	Y	Review / M-A
Extracorporeal membrane oxygenation for respiratory failure: past, present and future.	Noble DW, Peek GJ.	Anaesthesia. 2010 Oct;65(10):971-4.	2010	Referenced	Y	No clinical data
Extracorporeal membrane oxygenation (ECMO) reconsidered.	Moran JL1, Chalwin RP, Graham PL	Crit Care Resusc. 2010 Jun;12(2):131-5.	2010	Referenced	Y	Review / M-A
Ventilatory support versus ECMO for severe adult respiratory failure.	Jones A, Barrett N, Scales D, Beale R.	Lancet. 2010 Feb 13;375(9714):550-1; author reply 551.	2010	Referenced	Y	No clinical data
Support time-dependent outcome analysis for veno-venous extracorporeal membrane oxygenation.	Camboni D, Philipp A, Lubnow M, Bein T, Haneya A, Diez C, Schmid C, MÃ¼ller T.	Eur J Cardiothorac Surg. 2011 Dec;40(6):1341-6;discussion 1346-7. doi: 10.1016/j.ejcts.2011.03.062. Epub 2011 Jun 22.	2011	pubmed	Y	Duplicate
Retrieval of critically ill adults using extracorporeal membrane oxygenation: an Australian experience.	Forrest P, Ratchford J, Burns B, Herkes R, Jackson A, Plunkett B, Torzillo P, Nair P, Granger E, Wilson M, Pye R.	Intensive Care Med. 2011 May;37(5):824-30. doi: 10.1007/s00134-011-2158-8. Epub 2011 Feb 26.	2011	pubmed	Y	Less 50 patients
Vascular complications in patients undergoing femoral cannulation for extracorporeal membrane oxygenation support.	Bisdas T, Beutel G, Warnecke G, Hoeper MM, Kuehn C, Haverich A, Teebken OE.	Ann Thorac Surg. 2011 Aug;92(2):626-31. doi: 10.1016/j.athoracsur.2011.02.018. Epub 2011 May 8.	2011	pubmed	Y	Less 50 patients
A novel strategy to improve systemic oxygenation in venovenous extracorporeal membrane oxygenation: the Ï‡-configuration"."	Bonacchi M, Harmelin G, Peris A, Sani G.	J Thorac Cardiovasc Surg. 2011 Nov;142(5):1197-204. doi: 10.1016/j.jtcvs.2011.01.046. Epub 2011 Mar 12.	2011	pubmed	Y	Less 50 patients
Insertion of bicaval dual lumen extracorporeal membrane oxygenation catheter with image guidance.	Javidfar J, Wang D, Zwischenberger JB, Costa J, Mongero L, Sonett J, Bacchetta M.	ASAIO J. 2011 May-Jun;57(3):203-5. doi: 10.1097/MAT.0b013e3182155fee.	2011	pubmed	Y	Less 50 patients
Management of acute respiratory complications from influenza A (H1N1) infection: experience of a tertiarylevel Intensive Care Unit.	Grasselli G, Bombino M, Patroniti N, Foti G, Benini A, Abbruzzese C, Fumagalli R, Pesenti A.	Minerva Anestesiol. 2011 Sep;77(9):884-91.	2011	pubmed	Y	Less 50 patients
Addition of acetylsalicylic acid to heparin for anticoagulation management during pumpless extracorporeal lung assist.	Bein T, Zimmermann M, Philipp A, Ramming M, Sinner B, Schmid C, MÃ¼ller T, Graf B, Schlitt HJ, Weber-Carstens S.	ASAIO J. 2011 May-Jun;57(3):164-8. doi: 10.1097/MAT.0b013e318213f9e0.	2011	pubmed	Y	Less 50 patients
Safe transport of critically ill adult patients on extracorporeal membrane oxygenation support to a regional extracorporeal membrane oxygenation center.	Javidfar J, Brodie D, Takayama H, Mongero L, Zwischenberger J, Sonett J, Bacchetta M.	ASAIO J. 2011 Sep-Oct;57(5):421-5. doi: 10.1097/MAT.0b013e3182238b55.	2011	pubmed	Y	Less 50 patients
Interventional lung assist enables lung protective mechanical ventilation in acute respiratory distress syndrome.	Nierhaus A, Frings D, Braune S, Baumann HJ, Schneider C, Wittenburg B, Kluge S.	Minerva Anestesiol. 2011 Aug;77(8):797-801.	2011	pubmed	Y	Less 50 patients
Feasibility of inter-hospital transportation using extra-corporeal membrane oxygenation (ECMO) support of patients affected by severe swine-flu(H1N1)-related ARDS.	Ciapetti M, Cianchi G, Zagli G, Greco C, Pasquini A, Spina R, Batacchi S, Bonizzoli M, Bonacchi M, Lazzeri C, Bernardo P, Peris A.	Scand J Trauma Resusc Emerg Med. 2011 May 27;19:32. doi: 10.1186/1757-7241-19-32.	2011	pubmed	Y	Less 50 patients
Extracorporeal membrane oxygenation for severe ARDS in pregnant and postpartum women during the 2009 H1N1 pandemic.	Nair P, Davies AR, Beca J, Bellomo R, Ellwood D, Forrest P, Jackson A, Pye R, Seppelt I, Sullivan E, Webb S.	Intensive Care Med. 2011 Apr;37(4):648-54. doi: 10.1007/s00134-011-2138-z. Epub 2011 Feb 12.	2011	pubmed	Y	Less 50 patients
Extracorporeal membrane oxygenation for acute respiratory distress syndrome: is the configuration mode an important predictor for the outcome?	StÃ¶hr F, Emmert MY, Lachat ML, Stocker R, Maggiorini M, Falk V, Wilhelm MJ.	Interact Cardiovasc Thorac Surg. 2011 May;12(5):676-80. doi: 10.1510/icvts.2010.258384. Epub 2011 Feb 8.	2011	pubmed	Y	Less 50 patients
Mobile cardio-respiratory support in prehospital emergency medicine.	Chenaitia H, Massa H, Toesca R, Michelet P, Auffray JP, Gariboldi V.	Eur J Emerg Med. 2011 Apr;18(2):99-101. doi: 10.1097/MEJ.0b013e3283402249.	2011	pubmed	Y	Less 50 patients
Conservative blood transfusion strategies are effective for the management of adult patients with severe acute respiratory distress syndrome requiring extracorporeal membrane oxygenation	Agerstrand C L , Burkart K M , Baldwin M R , Bulman W A , Brenner K , Bacchetta M D , Brodie D	Am J Respir Crit Care Med . 2011;183(1): -	2011	Embase	Y	Less 50 patients
Extracorporeal membrane oxygenation for interhospital transfer of severe acute respiratory distress syndrome patients: 5-year experience.	IsgrÃ² S, Patroniti N, Bombino M, Marcolin R, Zanella A, Milan M, Foti G, Pesenti A.	Int J Artif Organs. 2011 Nov;34(11):1052-60. doi: 10.5301/ijao.5000011.	2011	pubmed	Y	Less 50 patients
Risk of Circuit Infection in Septic Patients on Extracorporeal Membrane Oxygenation: A Preliminary Study	Muller T , Lubnow M , Philipp A , Schneider-Brachert W , Camboni D , Schmid C , Lehle K	Artif Organs. 2011;35(4):E84: E90-E84: E90	2011	Embase; MEDLINE	Y	Less 50 patients
Use of nafamostat mesilate as an anticoagulant during extracorporeal membrane oxygenation.	Han SJ, Kim HS, Kim KI, Whang SM, Hong KS, Lee WK, Lee SH.	J Korean Med Sci. 2011 Jul;26(7):945-50. doi: 10.3346/jkms.2011.26.7.945. Epub 2011 Jun 20.	2011	pubmed	Y	Less 50 patients
Extracorporeal membrane oxygenation as a bridge to lung transplant: midterm outcomes.	Bermudez CA, Rocha RV, Zaldonis D, Bhama JK, Crespo MM, Shigemura N, Pilewski JM, Sappington PL, Boujoukos AJ, Toyoda Y.	Ann Thorac Surg. 2011 Oct;92(4):1226-31; discussion 1231-2. doi: 10.1016/j.athoracsur.2011.04.122. Epub 2011 Aug 26.	2011	pubmed	Y	Less 50 patients
Extracorporeal membrane oxygenator rescue and airborne transportation of patients with influenza A (H1N1) acute respiratory distress syndrome in a Mediterranean underserved area.	D'Ancona G, Capitanio G, Chiaramonte G, Serretta R, Turrisi M, Pilato M, Arcadipane A.	Interact Cardiovasc Thorac Surg. 2011 Jun;12(6):935-7. doi: 10.1510/icvts.2010.260448. Epub 2011 Mar 25.	2011	pubmed	Y	Less 50 patients
Extracorporeal circulatory systems as a bridge to lung transplantation at remote transplant centers.	Haneya A1, Philipp A, Mueller T, Lubnow M, Pfeifer M, Zink W, Hilker M, Schmid C, Hirt S.	Ann Thorac Surg. 2011 Jan;91(1):250-5.	2011	Referenced	Y	Less 50 patients
Ventilatory and ECMO treatment of H1N1-induced severe respiratory failure: results of an Italian referral ECMO center.	Cianchi G, Bonizzoli M, Pasquini A, Bonacchi M, Zagli G, Ciapetti M, Sani G, Batacchi S, Biondi S, Bernardo P, Lazzeri C, Giovannini V, Azzi A, Abbate R, Gensini G, Peris A.	BMC Pulm Med. 2011 Jan 11;11:2. doi: 10.1186/1471-2466-11-2.	2011	pubmed	Y	Less 50 patients
Extracorporeal membrane oxygenation in 5 patients with bronchial fistula with severe acute lung injury.	Daoud O, Augustin P, Mordant P, Lasocki S, Al-Attar N, Maury JM, Desmard M, Longrois D, Montravers P.	Ann Thorac Surg. 2011 Jul;92(1):327-30. doi: 10.1016/j.athoracsur.2011.01.060.	2011	pubmed	Y	Less 50 patients
First experience with the ultra compact mobile extracorporeal membrane oxygenation system Cardiohelp in interhospital transport.	Philipp A, Arlt M, Amann M, Lunz D, MÃ¼ller T, Hilker M, Graf B, Schmid C.	Interact Cardiovasc Thorac Surg. 2011 Jun;12(6):978-81. doi: 10.1510/icvts.2010.264630. Epub 2011 Mar 8.	2011	pubmed	Y	Less 50 patients
[Extracorporeal membrane oxygenation for severe acute respiratory distress syndrome caused by novel 2009 influenza A (H1N1) virus].	Zhan QY, Sun B, Tong ZH, Guo LM, Xu L, Zhu X, Jia XJ, Wang C.	Zhonghua Yi Xue Za Zhi. 2011 Dec 13;91(46):3262-6. Chinese.	2011	pubmed	Y	Not english
A patient with abdominal compartment syndrome and perforated transverse colon successfully managed with ECMO.	Chao CS, Chang YP, Chin HK, Chin J.	Ann Acad Med Singapore. 2011 Dec;40(12):554-5. No abstract available.	2011	pubmed	Y	Less 50 patients
International retrieval of adults on extracorporeal membrane oxygenation support.	Forrest P, Cheong JY, Vallely MP, Torzillo PJ, Hendel PN, Wilson MK, Bannontt PG, Bayfield MS, Herkes R, Walker SW.	Anaesth Intensive Care. 2011 Nov;39(6):1082-5.	2011	pubmed	Y	Less 50 patients
Early extracorporeal life support as rescue for Wegener granulomatosis with diffuse alveolar hemorrhage and acute respiratory distress syndrome: a case report and literature review.	Joseph M, Charles AG.	Pediatr Emerg Care. 2011 Dec;27(12):1163-6. doi: 10.1097/PEC.0b013e31823b01a2. Review.	2011	pubmed	Y	Less 18yr
[ARDS/ALI in Childhood: treatment guideline].	Gortner L, MÃ¶ller J, Reiss I; North American European Consensus Conference (NAECC).	Klin Padiatr. 2011 Dec;223(7):440-4. doi: 10.1055/s-0031-1286298. Epub 2011 Nov 21. German. No abstract available.	2011	pubmed	Y	Review / M-A
The impact of extracorporeal membrane oxygenation on survival in pediatric patients with respiratory and heart failure: review of our experience.	Goto T, Suzuki Y, Suzuki Y, Osanai A, Aoki K, Yamazaki A, Daitoku K, Fukuda I.	Artif Organs. 2011 Nov;35(11):1002-9. doi: 10.1111/j.1525-1594.2011.01374.x.	2011	pubmed	Y	Less 18yr
Use of two oxygenators during extracorporeal membrane oxygenator for a patient with acute respiratory distress syndrome, high-pressure ventilation, hypercapnia, and traumatic brain injury.	Leloup G, RozÃ© H, Calderon J, Ouattara A.	Br J Anaesth. 2011 Dec;107(6):1014-5. doi: 10.1093/bja/aer365. No abstract available.	2011	pubmed	Y	Less 50 patients
Extracorporeal membrane oxygenation for ARDS in adults.	Brodie D, Bacchetta M.	N Engl J Med. 2011 Nov 17;365(20):1905-14. doi: 10.1056/NEJMct1103720. Review.	2011	pubmed	Y	Review / M-A
[Application of extracorporeal membrane oxygenation therapy (ECMO) in the treatment of severe adult respiratory distress syndrome].	Mildh L, LemstrÃ¶m KB, Jokinen JJ, Raivio P, Suojaranta-Ylinen R, HÃ¤mmÃ¤inen P.	Duodecim. 2011;127(19):2055-62. Review. Finnish.	2011	pubmed	Y	Not english
[Acute respiratory distress syndrome treated by pumpless extracorporeal lung assist device].	Cordier PY, Nau A, Peytel E.	Ann Fr Anesth Reanim. 2011 Dec;30(12):937-8. doi: 10.1016/j.annfar.2011.07.017. Epub 2011 Oct 29. French. No abstract available.	2011	pubmed	Y	Not english
[Interhospital transport of patients requiring extracorporeal membrane oxygenation ECMO].	Knapik P, Przybylski R, Borkowski J, Koba R, Borowik D, Maciejewski T, Borowicz M, WÅ‚oczka G.	Anestezjol Intens Ter. 2011 Jul-Sep;43(3):169-73. Polish.	2011	pubmed	Y	Not english
[Severe acute respiratory distress syndrome complicating type A (H1N1) influenza treated with extracorporeal CO2 removal].	Smiechowicz J, Barteczko B, Grotowska M, Kaiser T, ZieliÅ„ski S, KÃ¼bler A.	Anestezjol Intens Ter. 2011 Apr-Jun;43(2):98-103. Polish.	2011	pubmed	Y	Less 50 patients
Iliopsoas haematoma: unexpected life-threatening complication during extracorporeal membrane oxygenation support in H1N1-induced acute respiratory distress syndrome patients.	Peris A, Zagli G, Cianchi G, Lazzeri C, Sani G, Bonizzoli M.	Br J Anaesth. 2011 Nov;107(5):819-20. doi: 10.1093/bja/aer315. No abstract available.	2011	pubmed	Y	Less 50 patients
Experience with high frequency oscillation ventilation during the 2009 H1N1 influenza pandemic in Australia and New Zealand.	Boots RJ, Lipman J, Lassig-Smith M, Stephens DP, Thomas J, Shehabi Y, Bass F, Anthony A, Long D, Seppelt IM, Weisbrodt L, Erickson S, Beca J, Sherring C, McGuiness S, Parke R, Stachowski ER, Boyd R, Howet B.	Anaesth Intensive Care. 2011 Sep;39(5):837-46.	2011	pubmed	Y	Less 50 patients
Critically ill patients with H1N1 influenza A undergoing extracorporeal membrane oxygenation.	Bibro C, Lasich C, Rickman F Jr, Foley NE, Kunugiyama SK, Moore E, O'Brien A, Sherman N, Schulman CS.	Crit Care Nurse. 2011 Oct;31(5):e8-e24. doi: 10.4037/ccn2011186.	2011	pubmed	Y	Less 50 patients
Extracorporeal membrane oxygenation as a bridge to liver transplantation for acute respiratory distress syndrome-induced life-threatening hypoxaemia aggravated by hepatopulmonary syndrome.	Monsel A, Mal H, Brisson H, Luo R, Eyraud D, VÃ©zinet C, Do CH, Lu Q, Vaillant JC, Hannoun L, Houssel P, Durand F, Rouby JJ.	Crit Care. 2011;15(5):R234. doi: 10.1186/cc10476. Epub 2011 Sep 29.	2011	pubmed	Y	Less 50 patients
Use of extracorporeal life support in adults with severe acute respiratory failure.	Rehder KJ, Turner DA, Cheifetz IM.	Expert Rev Respir Med. 2011 Oct;5(5):627-33. doi: 10.1586/ers.11.57. Review.	2011	pubmed	Y	Review / M-A
Extracorporeal life support: moving at the speed of light.	Dalton HJ.	Respir Care. 2011 Sep;56(9):1445-53; discuiion 1453-6. doi: 10.4187/respcare.01369. Review.	2011	pubmed	Y	Review / M-A
A small" defect with malignant effect."	Hammerstingl C, Nickenig G, Weber S, Knuefermann P.	J Am Coll Cardiol. 2011 Sep 13;58(12):e23. doi: 10.1016/j.jacc.2010.10.075. No abstract available.	2011	pubmed	Y	Less 50 patients
Extracorporeal membrane oxygenation support improves survival of patients with Hantavirus cardiopulmonary syndrome refractory to medical treatment.	Wernly JA, Dietl CA, Tabe CE, Pett SB, Crandall C, Milligan K, Crowley MR.	Eur J Cardiothorac Surg. 2011 Dec;40(6):1334-40. doi: 10.1016/j.ejcts.2011.01.089. Epub 2011 Sep 6.	2011	pubmed	Y	V-A ECMO
Extracorporeal membrane oxygenation for severe acute respiratory failure in adults: NICE guidance.	Bastin AJ, Firmin R.	Heart. 2011 Oct;97(20):1701-3. doi: 10.1136/heartjnl-2011-300708. Epub 2011 Aug 22. Review.	2011	pubmed	Y	Review / M-A
[Spontaneous preterm birth in mother in an artificial sleep on ECMO with severe form of H1N1 infection].	SkrenkovÃ¡ J, HorÃ¡kovÃ¡ V, HorÃ¡k P, KouckÃ½ M, DokoupilovÃ¡ M, KubÃ¡tovÃ¡ J.	Ceska Gynekol. 2011 Jun;76(3):204-8. Czech.	2011	pubmed	Y	Less 50 patients
Extracorporeal membrane oxygenation as rescue therapy for methadone-induced pulmonary edema.	Daugherty LE.	Pediatr Emerg Care. 2011 Jul;27(7):633-4. doi: 10.1097/PEC.0b013e3182225161.	2011	pubmed	Y	Less 50 patients
Ease of conversion from venovenous extracorporeal membrane oxygenation to cardiopulmonary bypass and venoarterial extracorporeal membrane oxygenation with a bicaval dual lumen catheter.	Bacchetta M, Javidfar J, Sonett J, Kim H, Zwischenberger J, Wang D.	ASAIO J. 2011 Jul-Aug;57(4):283-5. doi: 10.1097/MAT.0b013e31821d3f35.	2011	pubmed	Y	Less 50 patients
Preoperative multidisciplinary management of airway obstruction by huge goiter with papillary thyroid cancer.	Yamaguchi S, Fujii T, Yajima R, Uchida N, Ide M, Tsutsumi S, Yamauchi H, Kigure W, Morita H, Suto T, Asao T, Kuwano H.	Am Surg. 2011 May;77(5):E91-3. No abstract available.	2011	pubmed	Y	Less 50 patients
Extra-corporeal membrane oxygenation in the management of 2009 influenza A (H1N1) refractory respiratory failure.	Das JP, Chew N, Kitt E, Murphy C, O'Rourke J, Power M, McConkey SJ.	Ir Med J. 2011 Mar;104(3):90-1.	2011	pubmed	Y	Less 50 patients
Transesophageal echocardiography-guided technique for extracorporeal membrane oxygenation dual-lumen catheter placement.	Dolch ME, Frey L, Buerkle MA, Weig T, Wassilowsky D, Irlbeck M.	ASAIO J. 2011 Jul-Aug;57(4):341-3. doi: 10.1097/MAT.0b013e3182179aae.	2011	pubmed	Y	Less 50 patients
Extracorporeal membrane oxygenation survivors and pulmonary function: encouraging outcomes early in life.	McBride JT, Stone RT, Anas NG.	Pediatr Crit Care Med. 2011 Mar;12(2):223-4. doi: 10.1097/PCC.0b013e3181f268ce. No abstract available.	2011	pubmed	Y	Less 18yr
Strategies for diagnosis and treatment of iatrogenic tracheal ruptures.	Deja M, Menk M, Heidenhain C, Spies CD, Heymann A, Weidemann H, Branscheid D, Weber-Carstens S.	Minerva Anestesiol. 2011 Dec;77(12):1155-66. Epub 2011 May 20.	2011	pubmed	Y	No clinical data
A review of a newly established ECMO program in a university affiliated cardiac center.	BelohlÃ¡vek J, Rohn V, Tosovsky J, Kunstyr J, SemrÃ¡d M, HorÃ¡k J, Lips M, Mlejnsky F, Vykydal I, BalÃ­k M, StrÃ­tesky M, MrÃ¡zek V, Klein A, Linhart A, Lindner J.	J Cardiovasc Surg (Torino). 2011 Jun;52(3):445-51.	2011	pubmed	Y	V-A ECMO
First application of a new portable, miniaturized system for extracorporeal membrane oxygenation.	MÃ¼ller T, Philipp A, Lubnow M, Weingart C, Pfeifer M, Riegger GA, Schmid C.	Perfusion. 2011 Jul;26(4):284-8. doi: 10.1177/0267659111408634. Epub 2011 May 10.	2011	pubmed	Y	Less 50 patients
Bronchopleural fistulae and pulmonary ossification in posttraumatic acute respiratory distress syndrome: successful treatment with extracorporeal support.	Bombino M, Patroniti N, Foti G, IsgrÃ² S, Grasselli G, Pesenti A.	ASAIO J. 2011 Jul-Aug;57(4):336-40. doi: 10.1097/MAT.0b013e31821d8182.	2011	pubmed	Y	Less 50 patients
Use of extracorporeal membrane lung assist device (Novalung) in H1N1 patients.	Johnson P, FrÃ¶hlich S, Westbrook A.	J Card Surg. 2011 Jul;26(4):449-52. doi: 10.1111/j.1540-8191.2011.01261.x. Epub 2011 May 9.	2011	pubmed	Y	Less 50 patients
The Novalung interventional lung assist as bridge to lung transplantation for self-ventilating patients - initial experience.	Bartosik W, Egan JJ, Wood AE.	Interact Cardiovasc Thorac Surg. 2011 Aug;13(2):198-200. doi: 10.1510/icvts.2011.266346. Epub 2011 May 4.	2011	pubmed	Y	Less 50 patients
[Extracorporeal membrane oxygenation in acute respiratory distress syndrome after a liver transplant].	Romano J, Dufur M, Monedero P.	Rev Esp Anestesiol Reanim. 2011 Mar;58(3):174-7. Spanish.	2011	pubmed	Y	Less 50 patients
Cesarean section during ECMO support.	Panarello G, D'Ancona G, Capitanio G, Occhipinti G, Attardo G, Bertani A, Arcadipane A.	Minerva Anestesiol. 2011 Jun;77(6):654-7.	2011	pubmed	Y	Less 50 patients
[The use of extracorporeal membrane oxygenation (ECMO) in the treatment of acute respiratory distress syndrome due to pandemic influenza].	Knapik P, Przybylski R, Nadziakiewicz P, Koba R, Maciejewski T, Borowicz M, WÅ‚oczka G, Pawlak S, Zembala M.	Kardiol Pol. 2011;69(4):416-20. Polish.	2011	pubmed	Y	Less 50 patients
A[H1N1] flu and refractory hypoxaemia: is extracorporeal lung support the holy grail?	Veenith TV, Rana M, Ercole A, Gunning K, Mahroof R.	Thorax. 2011 Sep;66(9):836-7. doi: 10.1136/thoraxjnl-2011-200092. Epub 2011 Apr 22.	2011	pubmed	Y	Less 50 patients
Aeromonas pneumonia in a trauma patient requiring extracorporeal membrane oxygenation for severe acute respiratory distress syndrome: case report and literature review.	Issa N, Napolitano LM.	Surg Infect (Larchmt). 2011 Jun;12(3):241-5. doi: 10.1089/sur.2010.037. Epub 2011 Apr 21.	2011	pubmed	Y	Less 50 patients
[Utilization of extracorporeal membrane oxygenation in late stage of the acute respiratory distress syndrome].	LÃ³pez-Saubidet I, RodrÃ­guez PO, Maskin P, Attie S, Bonelli I, Valentini R.	Med Intensiva. 2011 Oct;35(7):448-50. doi: 10.1016/j.medin.2010.12.007. Epub 2011 Apr 14. Spanish. No abstract available.	2011	pubmed	Y	Less 50 patients
[Use of ECMO as a salvage therapy for refractory hypoxia secondary to a Lemierre's syndrome].	Carre AC, David JS, Mahr A, Flamens C, Fuster P, Bastien O.	Ann Fr Anesth Reanim. 2011 Jun;30(6):512-5. doi: 10.1016/j.annfar.2011.02.014. Epub 2011 Apr 13. French.	2011	pubmed	Y	Less 50 patients
Veno-venous extracorporeal membrane oxygenation as a bridge to and support for pulmonary thromboendarterectomy in misdiagnosed chronic thromboembolic pulmonary hypertension.	Faggian G, Onorati F, Chiominto B, Gottin L, Dan M, Ribichini F, Menon T, Santini F, Mazzucco A.	Artif Organs. 2011 Oct;35(10):956-60. doi: 10.1111/j.1525-1594.2010.01182.x. Epub 2011 Apr 14.	2011	pubmed	Y	Less 50 patients
Neurological complications of extracorporeal membrane oxygenation in children.	Hervey-Jumper SL, Annich GM, Yancon AR, Garton HJ, Muraszko KM, Maher CO.	J Neurosurg Pediatr. 2011 Apr;7(4):338-44. doi: 10.3171/2011.1.PEDS10443.	2011	pubmed	Y	Less 18yr
[One case of nosocomial A(H1N1)v2009 influenza in RÃ©union Island].	Vandroux D, Lugagne-Delpon N, Bossard G, Drouet D, Djourhi S, Jaffar-Bandjee MC, Henni T, Braunberger E, Champion S, GaÃ¼zere BA.	Bull Soc Pathol Exot. 2011 May;104(2):105-7. doi: 10.1007/s13149-011-0143-7. Epub 2011 Mar 30. French.	2011	pubmed	Y	Less 50 patients
Extracorporeal membrane oxygenation--understanding the evidence: CESAR and beyond.	Sidebotham D.	J Extra Corpor Technol. 2011 Mar;43(1):P23-6.	2011	pubmed	Y	Review / M-A
[Extracorporeal membrane oxygenation and severe traumatic brain injury. Is the ECMO-therapy in traumatic lung failure and severe traumatic brain injury really contraindicated?].	Muellenbach RM, Redel A, KÃ¼stermann J, Brack A, Gorski A, RÃ¶sner T, Roewer N, Wurmb T.	Anaesthesist. 2011 Jul;60(7):647-52. doi: 10.1007/s00101-011-1872-5. Epub 2011 Mar 16. Review. German.	2011	pubmed	Y	Less 50 patients
Acute respiratory distress syndrome--a case study.	Laird P, Ruppert SD.	Crit Care Nurs Q. 2011 Apr-Jun;34(2):165-74. doi: 10.1097/CNQ.0b013e3182129de2.	2011	pubmed	Y	Less 50 patients
Extracorporeal membrane oxygenation for severe refractory respiratory failure secondary to 2009 H1N1 influenza A.	Turner DA, Rehder KJ, Peterson-Carmichael SL, Ozment CP, Al-Hegelan MS, Williford WL, Peters MA, Noble PW, Cheifetz IM.	Respir Care. 2011 Jul;56(7):941-6. doi: 10.4187/respcare.01066. Epub 2011 Feb 21.	2011	pubmed	Y	Less 50 patients
Pediatric acute respiratory failure: areas of debate in the pediatric critical care setting.	Turner DA, Cheifetz IM.	Expert Rev Respir Med. 2011 Feb;5(1):65-73. doi: 10.1586/ers.10.93.	2011	pubmed	Y	Less 18yr
The simulation of an ex utero intrapartum procedure to extracorporeal membrane oxygenation.	Auguste TC, Boswick JA, Loyd MK, Battista A.	J Pediatr Surg. 2011 Feb;46(2):395-8. doi: 10.1016/j.jpedsurg.2010.10.007.	2011	pubmed	Y	Less 18yr
[Current approaches to the treatment of severe hypoxic respiratory insufficiency (acute lung injury; acute respiratory distress syndrome)].	Kluge S, MÃ¼ller T, Pfeifer M.	Dtsch Med Wochenschr. 2011 Feb;136(5):186-9. doi: 10.1055/s-0031-1272506. Epub 2011 Jan 26. Review. German.	2011	pubmed	Y	Not english
A review of the fundamental principles and evidence base in the use of extracorporeal membrane oxygenation (ECMO) in critically ill adult patients.	Allen S, Holena D, McCunn M, Kohl B, Sarani B.	J Intensive Care Med. 2011 Jan-Feb;26(1):13-26. doi: 10.1177/0885066610384061. Review.	2011	pubmed	Y	Review / M-A
Pushing the envelope.	Fortenberry JD.	Crit Care Med. 2011 Feb;39(2):415-6. doi: 10.1097/CCM.0b013e318205c316. No abstract available.	2011	pubmed	Y	Review / M-A
Unexpected effects on arterial oxygenation during reduction in oxygen flow via a pumpless lung assist system.	Lange J, Heiss M, Wappler F, Sakka SG.	Minerva Anestesiol. 2011 Mar;77(3):375-7. Epub 2011 Jan 18.	2011	pubmed	Y	Less 50 patients
A traveling team concept to expedite the transfer and management of unstable patients in cardiopulmonary shock.	Jaroszewski DE, Kleisli T, Staley L, Pierce C, Scott R, Steidley DE, DeValeria P, Arabia FA.	J Heart Lung Transplant. 2011 Jun;30(6):618-23. doi: 10.1016/j.healun.2010.11.018. Epub 2011 Jan 15.	2011	pubmed	Y	V-A ECMO
Turning the dial to futility.	Lynch JE, Zwischenberger JB.	Chest. 2011 Jan;139(1):230-1; author reply 231-2. doi: 10.1378/chest.10-1994. No abstract available.	2011	pubmed	Y	No clinical data
[High frequency oscillation ventilation and extracorporeal membrane oxygenation during pernicious malaria].	Vandroux D, Leaute B, Hoarau N, Ursulet L, Djouhri S, Braunberger E, GaÃ¼zÃ¨re BA.	Med Mal Infect. 2011 Apr;41(4):209-12. doi: 10.1016/j.medmal.2010.11.001. Epub 2010 Dec 30. French. No abstract available.	2011	pubmed	Y	Less 50 patients
Novel observations during extracorporeal membrane oxygenation in patients with ARDS due to the H1N1 pandemic influenza.	KutleÅ¡a M, Santini M, KrajinoviÄ‡ V, Raffanelli D, BarÅ¡iÄ‡ B.	Wien Klin Wochenschr. 2011 Feb;123(3-4):117-9. doi: 10.1007/s00508-010-1526-7. Epub 2011 Jan 3.	2011	pubmed	Y	Less 50 patients
[Interventional lung assist membrane ventilator. Successful use despite heparin-induced thrombocytopenia type II].	Lange J, KnÃ¼ttgen D, Stoelben E, Bauerfeind U, Wappler F, Sakka SG.	Anaesthesist. 2011 Mar;60(3):230-5. doi: 10.1007/s00101-010-1801-z. Epub 2010 Dec 25. German.	2011	pubmed	Y	Less 50 patients
Development of a collaborative program to provide extracorporeal membrane oxygenation for adults with refractory hypoxemia within the framework of a pandemic.	Turner DA, Williford WL, Peters MA, Thalman JJ, Shearer IR, Walczak RJ Jr, Griffis M, Olson SA, Sowers KW, Govert JA, Macintyre NR, Cheifetz IM.	Pediatr Crit Care Med. 2011 Jul;12(4):426-30. doi: 10.1097/PCC.0b013e3181ff41c1.	2011	pubmed	Y	Less 50 patients
Percutaneous left-heart decompression during extracorporeal membrane oxygenation: an alternative to surgical and transeptal venting in adult patients.	Avalli L, Maggioni E, Sangalli F, Favini G, Formica F, Fumagalli R.	ASAIO J. 2011 Jan-Feb;57(1):38-40. doi: 10.1097/MAT.0b013e3181fe5d0b.	2011	pubmed	Y	Less 50 patients
Sensorineural hearing loss at 9-13 years of age in children with a history of neonatal extracorporeal membrane oxygenation.	Murray M, Nield T, Larson-Tuttle C, Seri I, Friedlich P.	Arch Dis Child Fetal Neonatal Ed. 2011 Mar;96(2):F128-32. doi: 10.1136/adc.2010.186395. Epub 2010 Oct 21.	2011	pubmed	Y	Less 18yr
Extracorporeal membrane oxygenation for pediatric respiratory failure: Survival and predictors of mortality.	Zabrocki LA, Brogan TV, Statler KD, Poss WB, Rollins MD, Bratton SL.	Crit Care Med. 2011 Feb;39(2):364-70. doi: 10.1097/CCM.0b013e3181fb7b35.	2011	pubmed	Y	Less 18yr
ARDS outcomes: a marker of critical care quality in the UK?	Wise MP, Hart N, Frost PJ.	Thorax. 2011 Apr;66(4):359. doi: 10.1136/thx.2010.140541. Epub 2010 Oct 1. No abstract available.	2011	pubmed	Y	No clinical data
Successful use of neurally adjusted ventilatory assist in a patient with extremely low respiratory system compliance undergoing ECMO.	Mauri T, Bellani G, Foti G, Grasselli G, Pesenti A.	Intensive Care Med. 2011 Jan;37(1):166-7. doi: 10.1007/s00134-010-2030-2. Epub 2010 Sep 16. No abstract available.	2011	pubmed	Y	Less 50 patients
Clinical features of a Dutch cohort of critically ill children due to the 2009 new influenza A H1N1 pandemic.	van Zwol A, Witteveen R, Markhorst D, Geukers VG.	Clin Pediatr (Phila). 2011 Jan;50(1):69-72. doi: 10.1177/0009922810381426. Epub 2010 Sep 13.	2011	pubmed	Y	Less 18yr
The advent of ECMO and pumpless extracorporeal lung assist in ARDS.	Hamid IA, Hariharan AS, Shankar NR.	J Emerg Trauma Shock. 2011 Apr;4(2):244-50	2011	Referenced	Y	Review / M-A
Use of extracorporeal membrane lung assist device (Novalung) in H1N1 patients.	Johnson P, Fröhlich S, Westbrook A.	J Card Surg. 2011 Jul;26(4):449-52	2011	Referenced	Y	Duplicate
Pumpless extracorporeal lung assist for the treatment of severe, refractory status asthmaticus.	Jung C, Lauten A, Pfeifer R, Bahrmann P, Figulla HR, Ferrari M.	J Asthma. 2011 Feb;48(1):111-3.	2011	Referenced	Y	Less 50 patients
Extracorporeal membrane oxygenation as a first-line treatment strategy for ARDS: is the evidence sufficiently strong?	Checkley W.	JAMA. 2011 Oct 19;306(15):1703-4	2011	Referenced	Y	Review / M-A
Extracorporeal membrane oxygenation for critically ill patients with influenza A (H1N1) 2009: a case series.	Power CA, Van Heerden PV, Moxon D, Martindale G, Roberts B.	Crit Care Resusc. 2011 Mar;13(1):38-43.	2011	Referenced	Y	V-A ECMO
Usefulness of extracorporeal membrane oxygenation as a bridge to lung transplantation: a descriptive study.	Hämmäinen P, Schersten H, Lemström K, Riise GC, Kukkonen S, Swärd K, Sipponen J, Silverborn M, Dellgren G	J Heart Lung Transplant. 2011 Jan;30(1):103-7.	2011	Referenced	Y	V-A ECMO
Active rehabilitation and physical therapy during extracorporeal membrane oxygenation while awaiting lung transplantation: a practical approach.	Turner DA1, Cheifetz IM, Rehder KJ, Williford WL, Bonadonna D, Banuelos SJ, Peterson-Carmichael S, Lin SS, Davis RD, Zaas D.	Crit Care Med. 2011 Dec;39(12):2593-8.	2011	Referenced	Y	Less 50 patients
Extracorporeal life support systems: alternative vs. conventional circuits.	Khan S, Vasavada R, Qiu F, Kunselman A, Undar A.	Perfusion. 2011 May;26(3):191-8.	2011	Referenced	Y	No clinical data
Use of extracorporeal life support to support patients with acute respiratory distress syndrome due to H1N1/2009 influenza and other respiratory infections.	Wong I1, Vuylsteke A.	Perfusion. 2011 Jan;26(1):7-20.	2011	Referenced	Y	Review / M-A
Evidence and experience in extracorporeal membrane oxygenation.	MacLaren G.	Chest. 2011 Apr;139(4):965; author reply 965-6.	2011	Referenced	Y	No clinical data
Clinical evaluation of two different extracorporeal membrane oxygenation systems: a single center report.	Yu K1, Long C, Hei F, Li J, Liu J, Ji B, Gao G, Zhang H, Song Y, Wang W.	Artif Organs. 2011 Jul;35(7):733-7	2011	Referenced	Y	V-A ECMO
Extracorporeal membrane oxygenation for 2009 influenza A (H1N1)-associated acute respiratory distress syndrome.	Combes A1, Pellegrino V.	Semin Respir Crit Care Med. 2011 Apr;32(2):188-94.	2011	Referenced	Y	Review / M-A
Isolation of Aspergillus in three 2009 H1N1 influenza patients	Adalja A A , Sappington P L , Harris S P , Rimmele T , Kreit J W , Kellum J A , Boujoukos A J	Influ Other Respir Viruses. 2011;5(4):225-229	2011	Embase; MEDLINE	Y	Less 50 patients
Left ventricular decompression during peripheral extracorporeal membrane oxygenation support with the use of the novel iVAC pulsatile paracorporeal assist device	Anastasiadis K , Chalvatzoulis O , Antonitsis P , Tossios P , Papakonstantinou C	Ann Thorac Surg . 2011;92(6):2257-2259	2011	Embase; MEDLINE	Y	Less 50 patients
Brain injuries and neurological system failure are the most common proximate causes of death in children admitted to a pediatric intensive care unit	Au A K , Carcillo J A , Clark R S B , Bell M J	Pediatr Crit Care Med . 2011;12(5):566-571	2011	Embase; MEDLINE	Y	Less 18yr
Veno-venous extra corporeal membrane oxygenation with bi-caval dual lumen internal jugular catheter permits safe transport of adult patients with severe acute respiratory distress syndrome	Baldwin M R , Bulman W A , Burkart K M , Brenner K , Agerstrand C L , Bacchetta M D , Brodie D	Am J Respir Crit Care Med . 2011;183(1): -	2011	Embase	Y	No Complications Reported
Addition of acetylsalicylic acid to heparin for anticoagulation management during pumpless extracorporeal lung assist.	Bein T , Zimmermann M , Philipp A , Ramming M , Sinner B , Schmid C , Muller T , Graf B , Schlitt H J , Weber-Carstens S	ASAIO J . 2011;57(3):164-168	2011	MEDLINE	Y	Duplicate
Glial fibrillary acidic protein as a brain injury biomarker in children undergoing extracorporeal membrane oxygenation	Bembea M M , Savage W , Strouse J J , Schwartz J M , Graham E , Thompson C B , Everett A	Pediatr Crit Care Med . 2011;12(5):572-579	2011	Embase; MEDLINE	Y	Less 18yr
Critically ill patients with H1N1 influenza A undergoing extracorporeal membrane oxygenation	Bibro C , Lasich C , Rickman Jr F , Foley N E , Kunugiyama S K , Moore E , O'Brien A , Sherman N , Schulman C S	Crit Care Nurs . 2011;31(5):e8: e24-e8: e24	2011	MEDLINE	Y	Duplicate
Vascular complications in patients undergoing femoral cannulation for extracorporeal membrane oxygenation support.	Bisdas T , Beutel G , Warnecke G , Hoeper M M , Kuehn C , Haverich A , Teebken O E	Ann Thorac Surg . 2011;92(2):626-631	2011	MEDLINE	Y	Duplicate
Bronchopleural fistulae and pulmonary ossification in posttraumatic acute respiratory distress syndrome: successful treatment with extracorporeal support.	Bombino M , Patroniti N , Foti G , Isgro S , Grasselli G , Pesenti A	ASAIO J . 2011;57(4):336-340	2011	MEDLINE	Y	Less 50 patients
A novel strategy to improve systemic oxygenation in venovenous extracorporeal membrane oxygenation: The "(chi)-configuration"	Bonacchi M , Harmelin G , Peris A , Sani G	J Thorac Cardiovasc Surg . 2011;142(5):1197-1204	2011	Embase; MEDLINE	Y	Duplicate
Epidemiology and outcomes for extracorporeal membrane oxygenation in adults with heart disease	Briar C , Barrett C , Rajagopal S , Emani S , Fynn-Thompson F , Thiagarajan R	Crit Care Med . 2011;39( ):136-	2011	Embase	Y	V-A ECMO
Extracorporeal membrane oxygenation for ARDS in adults	Brodie D , Bacchetta M	New Engl J Med . 2011;365(20):1905-1914	2011	Embase; MEDLINE	Y	Duplicate
Support time-dependent outcome analysis for veno-venous extracorporeal membrane oxygenation	Camboni D , Philipp A , Lubnow M , Bein T , Haneya A , Diez C , Schmid C , Muller T	Eur J Cardio-thorac Surg . 2011;40(6):1341-1347	2011	Embase; MEDLINE	Y	Duplicate
Unusual association of ST-T abnormalities, myocarditis and cardiomyopathy with H1N1influenza in pregnancy: Two case reports and review of the literature	Chan K , Meek D , Chakravorty I	J Med Case Rep . 2011;5( ): -	2011	Embase	Y	V-A ECMO
Management of acute lung injury: Sharing data between adults and children	Cheifetz I. M.	Respir Care. 2011;56(9):1258-1268	2011	Embase; MEDLINE	Y	Less 18yr
Malpositioning of the chest tube across the anterior mediastinum is risky in chronic obstructive pulmonary disease patientswith pneumothorax	Chen Y -F, Chen C -Y, Hsu C -L, Yu C -J	Interact Cardiovasc Thorac Surg . 2011;13(1):109-111	2011	Embase; MEDLINE	Y	No clinical data
Outcome in patients with H1N1 influenza and cerebrovascular injury treated with extracorporeal membrane oxygenation	Chow F C , Edlow B L , Frosch M P , Copen W A , Greer D M	Neurocrit Care. 2011;15(1):156-160	2011	Embase; MEDLINE	Y	Less 50 patients
Feasibility of inter-hospital transportation using extra-corporeal membrane oxygenation (ECMO) support of patients affected by severe swine-flu(H1N1)-related ARDS.	Ciapetti M , Cianchi G , Zagli G , Greco C , Pasquini A , Spina R , Batacchi S , Bonizzoli M , Bonacchi M , Lazzeri C , Bernardo P , Peris A	Scand J Trauma Resusc Emerg Med. 2011;19( ):32-	2011	MEDLINE	Y	Duplicate
Systematic approach for severe respiratory failure due to novel a (H1N1) influenza	Cornejo R , Tobar E , Diaz G , Romero C , Llanos O , Galvez L R , Zamorano A , Fabrega L , Neira W , Arellano D , Repetto C , Aedo D , Diaz J C , Gonzalez R	Minerva Anestesiol . 2011;77(5):510-521	2011	Embase; MEDLINE	Y	Less 50 patients
Adult respiratory distress syndrome caused by 2009 H1N1 influenza during pregnancy: Success of ECMO for both the mother and the child	Courouble P , Geukens P , Laarbaui F , Beauloye C , Van Caenegem O , Jacquet L -M	J Extra-Corpor Technol . 2011;43(2):75-78	2011	Embase; MEDLINE	Y	Less 50 patients
Extracorporeal membrane oxygenation in 5 patients with bronchial fistula with severe acute lung injury	Daoud O , Augustin P , Mordant P , Lasocki S , Al-Attar N , Maury J -M, Desmard M , Longrois D , Montravers P	Ann Thorac Surg . 2011;92(1):327-330	2011	Embase; MEDLINE	Y	Not available
Children with asthma hospitalized with seasonal or pandemic influenza, 2003-2009	Dawood F S , Kamimoto L , D'Mello T A , Reingold A , Gershman K , Meek J , Arnold K E , Farley M , Ryan P , Lynfield R , Morin C , Baumbach J , Zansky S , Bennett N , Thomas A , Schaffner W , Kirschke D , Finelli L	Pediatrics. 2011;128(1):e27: e32-e27: e32	2011	Embase; MEDLINE	Y	Less 18yr
Organizing pneumonia presenting with hemoptysis in a teenager	Delgado-Villalta S M D R , Sami I , Pillai D , Sankoorikal B -J, Kureshi S , Lucas J	Am J Respir Crit Care Med . 2011;183(1): -	2011	Embase	Y	Less 50 patients
Lethal chickenpox infection during treatment with infliximab and methotrexate	Estmann A , Toftedal P , Schou A J	Pediatr Rheumatol . 2011;9( ): -	2011	Embase	Y	Less 50 patients
Veno-venous extracorporeal membrane oxygenation as a bridge to and support for pulmonary thromboendarterectomy in misdiagnosed chronic thromboembolic pulmonary hypertension	Faggian G , Onorati F , Chiominto B , Gottin L , Dan M , Ribichini F , Menon T , Santini F , Mazzucco A	Artif Organs. 2011;35(10):956-960	2011	Embase; MEDLINE	Y	Less 50 patients
Retrieval of critically ill adults using extracorporeal membrane oxygenation: An Australian experience	Forrest P , Ratchford J , Burns B , Herkes R , Jackson A , Plunkett B , Torzillo P , Nair P , Granger E , Wilson M , Pye R	Intensive Care Med . 2011;37(5):824-830	2011	Embase; MEDLINE	Y	Duplicate
Ambulatory veno-venous extracorporeal membrane oxygenation: Innovation and pitfalls	Garcia J P , Kon Z N , Evans C , Wu Z , Iacono A T , McCormick B , Griffith B P	J Thorac Cardiovasc Surg . 2011;142(4):755-761	2011	Embase; MEDLINE	Y	Not available
Mobile extracorporeal membrane oxygenation after traumatic freshwater submersion using bi-caval dual lumen catheter	Geelen C C , Bouman E A , Roekaerts P M , Breedveld P , Strauch U , Van Garsse L , Weerwind P W , Donker D W	Intensive Care Med . 2011;37(12):2054-2055	2011	Embase; MEDLINE	Y	Less 50 patients
Use of extracorporeal membrane oxygenation (ECMO) as a salvage therapy for refractory hypoxemia secondary to acute chest syndrome	Gopal M , Orsi D , Khilkin M , Dulu A , Bello R , Trandafirescu T , Dicpinigaitis P , Lopez W , Kvetan V	Chest. 2011;140(4): -	2011	Embase	Y	Less 50 patients
The Impact of Extracorporeal Membrane Oxygenation on Survival in Pediatric Patients With Respiratory and Heart Failure: Review of Our Experience	Goto T , Suzuki Y , Suzuki Y , Osanai A , Aoki K , Yamazaki A , Daitoku K , Fukuda I	Artif Organs. 2011;35(11):1002-1009	2011	Embase; MEDLINE	Y	Duplicate
Management of acute respiratory complications from influenza a (H1N1) infection: Experience of a tertiary-level intensive care unit	Grasselli G , Bombino M , Patroniti N , Foti G , Benini A , Abbruzzese C , Fumagalli R , Pesenti A	Minerva Anestesiol . 2011;77(9):884-891	2011	Embase; MEDLINE	Y	No Complications Reported
Extracorporeal membrane oxygenation with hemoconcentration in a hypervolemic patient with critical aortic stenosis	Gregoric I D , Kar B , Gholkar G , Patel S , Crane T , Nathan S , Loyalka P	Tex Heart Inst J . 2011;38(5):565-567	2011	Embase; MEDLINE	Y	Less 50 patients
Outcomes in ards due to H1N1 pneumonia in patients receiving airway pressure release ventilation	Grover V , Gold J , Hagg D , Jacoby D , Lakdawalla H , Letourneau J , Smith S	Chest. 2011;140(4): -	2011	Embase	Y	No Complications Reported
Idiopathic acute eosinophilic pneumonia in a young smoker requiring extracorporeal membrane oxygenation	Gul M , Freed R , Rizvi N , Wojnar M	Chest. 2011;140(4): -	2011	Embase	Y	Less 50 patients
Survival after 385 min of cardiopulmonary resuscitation with extracorporeal membrane oxygenation and rewarming with haemodialysis for hypothermic cardiac arrest	Hagiwara S , Yamada T , Furukawa K , Ishihara K , Nakamura T , Ohyama Y , Tamura J , Oshima K	Resuscitation. 2011;82(6):790-791	2011	Embase; MEDLINE	Y	Less 50 patients
A "small" defect with malignant effect	Hammerstingl C , Nickenig G , Weber S , Knuefermann P	J Am Coll Cardiol . 2011;58(12):e23-e23	2011	Embase; MEDLINE	Y	Duplicate
Life-threatening gastric dilatation with anorexia nervosa	Hausler I , Augscholl C , Rabl C , Ofner-Velano D , Emmanuel K	Eur Surg Acta Chir Austriaca. 2011;43(5):318-320	2011	Embase	Y	Less 50 patients
Refractory bilateral pneumothoraces in end-stage cystic fibrosis	Hayes Jr D , Golden J A , Hoopes C W	Ann Thorac Surg . 2011;92(5):1905-	2011	Embase; MEDLINE	Y	Less 50 patients
Neurological complications of extracorporeal membrane oxygenation in children	Hervey-Jumper S L , Annich G M , Yancon A R , Garton H J L , Muraszko K M , Maher C O	J Neursurg Pediatr . 2011;7(4):338-344	2011	Embase; MEDLINE	Y	Duplicate
The critical care costs of the influenza A/H1N1 2009 pandemic in Australia and New Zealand	Higgins A M , Pettila V , Harris A H , Bailey M , Lipman J , Seppelt I M , Webb S A	Anaesth Intensive Care. 2011;39(3):384-391	2011	Embase; MEDLINE	Y	No Complications Reported
Discussion	Hines M , Ibrahimiye A N , Zwischenberger J B , Wozniak T	Ann Thorac Surg . 2011;91(6):1769-	2011	Embase	Y	Unable to find data
Treatment of a life-threatening acute chest syndrome with hemolytic crisis in sickle cell disease using an extracorporeal membrane oxygenation (ECMO)	Hoffmann M , Geldner G , Leschke M	Dtsch Med Wochenschr . 2011;136(43):2192-2195	2011	Embase; MEDLINE	Y	Not english
Massive gastric distension	Hohenauer P , Dunser M W	Wien Klin Wochenschr . 2011;123(19-20):592-	2011	Embase; MEDLINE	Y	Less 50 patients
Aeromonas pneumonia in a trauma patient requiring extracorporeal membrane oxygenation for severe acute respiratory distress syndrome: Case report and literature review	Issa N , Napolitano L M	Surg Infect . 2011;12(3):241-245	2011	Embase; MEDLINE	Y	Duplicate
Safe transport of critically ill adult patients on extracorporeal membrane oxygenation support to a regional extracorporeal membrane oxygenation center.	Javidfar J , Brodie D , Takayama H , Mongero L , Zwischenberger J , Sonett J , Bacchetta M	ASAIO J . 2011;57(5):421-425	2011	MEDLINE	Y	Duplicate
Insertion of bicaval dual lumen extracorporeal membrane oxygenation catheter with image guidance.	Javidfar J , Wang D , Zwischenberger J B , Costa J , Mongero L , Sonett J , Bacchetta M	ASAIO J . 2011;57(3):203-205	2011	MEDLINE	Y	Duplicate
Early extracorporeal life support as rescue for Wegener granulomatosis with diffuse alveolar hemorrhage and acute respiratory distress syndrome: a case report and literature review.	Joseph M , Charles A G	Pediatr Emerg Care. 2011;27(12):1163-1166	2011	MEDLINE	Y	Duplicate
Novel swine-origin influenza a (H1N1) virus infection of the lung presenting with a "crazy-paving" pattern on high-resolution CT	Juan Y -H, Chen C -M, Hsu H -H, Lin H -F, Chang W -C	J Med Sci (Taiwan). 2011;31(3):125-128	2011	Embase	Y	No Complications Reported
[Interhospital transport of patients requiring extracorporeal membrane oxygenation ECMO].	Knapik P , Przybylski R , Borkowski J , Koba R , Borowik D , Maciejewski T , Borowicz M , Wloczka G	Anestezjol Intens Ter. 2011;43(3):169-173	2011	MEDLINE	Y	Not english
The use of extracorporeal membrane oxygenation (ECMO) in the treatment of acute respiratory distress syndrome due to pandemic influenza	Knapik P , Przybylski R , Nadziakiewicz P , Koba R , Maciejewski T , Borowicz M , Wloczka G , Pawlak S , Zembala M	Kardiol Pol . 2011;69(4):416-420	2011	Embase; MEDLINE	Y	Duplicate
Use of two oxygenators during extracorporeal membrane oxygenator for a patient with acute respiratory distress syndrome, high-pressure ventilation, hypercapnia, and traumatic brain injury	Leloup G , Roze H , Calderon J , Ouattara A	Br J Anaesth . 2011;107(6):1014-1015	2011	Embase; MEDLINE	Y	Duplicate
Corticosteroid therapy in intensive care unit patients with PCR-confirmed influenza A(H1N1) infection in Finland	Linko R , Pettila V , Ruokonen E , Varpula T , Karlsson S , Tenhunen J , Reinikainen M , Saarinen K , Perttila J , Parviainen I , Ala-Kokko T	Acta Anaesthesiol Scand . 2011;55(8):971-979	2011	Embase; MEDLINE	Y	No Complications Reported
Neurological injury in adults treated with extracorporeal membrane oxygenation	Mateen F J , Muralidharan R , Shinohara R T , Parisi J E , Schears G J , Wijdicks E F M	Arch Neurol . 2011;68(12):1543-1549	2011	Embase; MEDLINE	Y	V-A ECMO
Neurally Adjusted Ventilatory Assist (NAVA) improves patient-ventilator interaction in severe ards patients undergoing ECMO	Mauri T , Bellani G , Confalonieri A , Bombino M , Grasselli G , Foti G , Patroniti N , Pesenti A	Am J Respir Crit Care Med . 2011;183(1): -	2011	Embase	Y	Less 50 patients
Pulmonary artery and conduit reintervention rates after norwood using a right ventricle to pulmonary artery conduit	Mery C M , Lapar D J , Seckeler M D , Chamberlain R S , Gangemi J J , Kron I L , Peeler B B	Ann Thorac Surg . 2011;92(4):1483-1489	2011	Embase; MEDLINE	Y	Less 50 patients
[Application of extracorporeal membrane oxygenation therapy (ECMO) in the treatment of severe adult respiratory distress syndrome].	Mildh L , Lemstrom K B , Jokinen J J , Raivio P , Suojaranta-Ylinen R , Hammainen P	Duodecim. 2011;127(19):2055-2062	2011	MEDLINE	Y	Not english
Rescue therapies in patients with refractory hypoxemia	Moreno Franco P , Rachmale S , Ding S , Wilson G , Li G	Am J Respir Crit Care Med . 2011;183(1): -	2011	Embase	Y	No Complications Reported
Efficacy of portable and percutaneous cardiopulmonary bypass rewarming versus that of conventional internal rewarming for patients with accidental deep hypothermia	Morita S , Inokuchi S , Yamagiwa T , Iizuka S , Yamamoto R , Aoki H , Okada M	Crit Care Med . 2011;39(5):1064-1068	2011	Embase; MEDLINE	Y	V-A ECMO
Successful use of extracorporeal membrane oxygenation in a patient with transfusion-related acute lung injury	Mosier J , O'Keeffe T , Graham H , Rhee P M	Crit Care Shock. 2011;14(2):40-45	2011	Embase	Y	Less 50 patients
First application of a new portable, miniaturized system for extracorporeal membrane oxygenation	Muller T , Philipp A , Lubnow M , Weingart C , Pfeifer M , Riegger G A J , Schmid C	Perfusion. 2011;26(4):284-288	2011	Embase; MEDLINE	Y	Less 50 patients
Extracorporeal membrane oxygenation as a bridge to pulmonary endarterectomy	Mydin M , Berman M , Klein A , Tsui S , Dunning J , Valchanov K , Vuylsteke A , Jenkins D P	Ann Thorac Surg . 2011;92(5):e101: e103-e101: e103	2011	Embase; MEDLINE	Y	Duplicate
Extracorporeal membrane oxygenation for severe ARDS in pregnant and postpartum women during the 2009 H1N1 pandemic	Nair P , Davies A R , Beca J , Bellomo R , Ellwood D , Forrest P , Jackson A , Pye R , Seppelt I , Sullivan E , Webb S	Intensive Care Med . 2011;37(4):648-654	2011	Embase; MEDLINE	Y	Duplicate
Interventional lung assist enables lung protective mechanical ventilation in acute respiratory distress syndrome	Nierhaus A , Frings D P , Braune S , Baumann H -J, Schneider C , Wittenburg B , Kluge S	Minerva Anestesiol . 2011;77(8):797-801	2011	Embase; MEDLINE	Y	Duplicate
Referral to an extracorporeal membrane oxygenation center and mortality among patients with severe 2009 influenza A(H1N1)	Noah M A , Peek G J , Finney S J , Griffiths M J , Harrison D A , Grieve R , Sadique M Z , Sekhon J S , McAuley D F , Firmin R K , Harvey C , Cordingley J J , Price S , Vuylsteke A , Jenkins D P , Noble D W , Bloomfield R , Walsh T S , Perkins G D , Menon D , Taylor B L , Rowan K M	J Am Med Assoc . 2011;306(15):1659-1668	2011	Embase; MEDLINE	Y	Duplicate
Acute Respiratory Distress Syndrome as a presenting manifestation in young patients infected with H1N1 influenza virus	Pabst D , Kuehn J , Schuler-Luettmann S , Wiebe K , Lebiedz P	Eur J Intern Med . 2011;22(6):e119: e124-e119: e124	2011	Embase; MEDLINE	Y	Less 50 patients
Cesarean section during ECMO support	Panarello G , D'Ancona G , Capitanio G , Occhipinti G , Attardo G , Bertani A , Arcadipane A	Minerva Anestesiol . 2011;77(6):654-657	2011	Embase; MEDLINE	Y	Less 50 patients
Intensive pulmonary support using extracorporeal membrane oxygenation for adult liver transplant recipients with respiratory failure	Park Y , Park H -W, Hwang S , Namgoong J -M, Jung S -W, Yoon S -Y, Park G -C, Song G -W, Jung D -H, Lee S -G	HPB. 2011;13( ):219-	2011	Embase	Y	Duplicate
Successful use of venovenous extracorporeal membrane oxygenation for complicated H1N1 pneumonia refractory to mechanical ventilation	Patel S A , DeMare J S , Truemper E J , Deptula J J	J Extra-Corpor Technol . 2011;43(2):70-74	2011	Embase; MEDLINE	Y	Less 50 patients
The Italian ECMO network experience during the 2009 influenza A(H1N1) pandemic: Preparation for severe respiratory emergency outbreaks	Patroniti N , Zangrillo A , Pappalardo F , Peris A , Cianchi G , Braschi A , Iotti G A , Arcadipane A , Panarello G , Ranieri V M , Terragni P , Antonelli M , Gattinoni L , Oleari F , Pesenti A	Intensive Care Med . 2011;37(9):1447-1457	2011	Embase; MEDLINE	Y	Duplicate
Iliopsoas haematoma: Unexpected life-threatening complication during extracorporeal membrane oxygenation support in H1N1-induced acute respiratory distress syndrome patients	Peris A , Zagli G , Cianchi G , Lazzeri C , Sani G , Bonizzoli M	Br J Anaesth . 2011;107(5):819-820	2011	Embase; MEDLINE	Y	Less 50 patients
Failure of combination oral oseltamivir and inhaled zanamivir antiviral treatment in ventilator- and ECMO-treated critically ill patients with pandemic influenza A (H1N1)v	Petersen E , Keld D B , Ellermann-Eriksen S , Gubbels S , Ilkjaer S , Jensen-Fangel S , Lindskov C	Scand J Infect Dis . 2011;43(6/7/2015):495-503	2011	Embase; MEDLINE	Y	V-A ECMO
First experience with the ultra compact mobile extracorporeal membrane oxygenation system Cardiohelp in interhospital transport	Philipp A , Arlt M , Amann M , Lunz D , Muller T , Hilker M , Graf B , Schmid C	Interact Cardiovasc Thorac Surg . 2011;12(6):978-981	2011	Embase; MEDLINE	Y	Duplicate
Use of extracorporeal life support in adults with severe acute respiratory failure	Rehder K J , Turner D A , Cheifetz I M	Expert Rev Respir Med . 2011;5(5):627-633	2011	Embase; MEDLINE	Y	Review / M-A
Cardiogenic shock following administration of propofol and fentanyl in a healthy woman: A case report	Renilla Gonzalez A , Lozano Martinez-Luengas I , Secades Gonzalez S , Alvarez Pichel I , Alvarez Martinez P , Santamarta Liebana E , Diaz Molina B	J Med Case Rep . 2011;5( ): -	2011	Embase	Y	V-A ECMO
An assessment of H1N1 influenza-associated acute respiratory distress syndrome severity after adjustment for treatment characteristics	Riscili B P , Anderson T B , Prescott H C , Exline M C , Sopirala M M , Phillips G S , Ali N A	PLoS ONE. 2011;6(3): -	2011	Embase; MEDLINE	Y	No Complications Reported
Acinetobacter baumannii resistant to colistin with impaired virulence: A case report from France	Rolain J -M, Roch A , Castanier M , Papazian L , Raoult D	J Infect Dis . 2011;204(7):1146-1147	2011	Embase; MEDLINE	Y	Less 50 patients
Successful lung retransplantation after extended use of extracorporeal membrane oxygenation as a bridge	Shigemura N , Bermudez C , Bhama J , Bonde P , Thacker J , Toyoda Y	Transplant Proc . 2011;43(5):2063-2065	2011	Embase; MEDLINE	Y	Less 50 patients
[Spontaneous preterm birth in mother in an artificial sleep on ECMO with severe form of H1N1 infection].	Skrenkova J , Horakova V , Horak P , Koucky M , Dokoupilova M , Kubatova J	Ceska Gynekol . 2011;76(3):204-208	2011	MEDLINE	Y	Less 50 patients
Extracorporeal membrane oxygenation for acute respiratory distress syndrome: Is the configuration mode an important predictor for the outcome?	Stohr F , Emmert M Y , Lachat M L , Stocker R , Maggiorini M , Falk V , Wilhelm M J	Interact Cardiovasc Thorac Surg . 2011;12(5):676-680	2011	Embase; MEDLINE	Y	V-A ECMO
Immediate single lobar retransplantation for primary graft dysfunction after living-donor lobar lung transplantation: Report of a case	Tagawa T , Yamasaki N , Tsuchiya T , Miyazaki T , Hara A , Amenomori M , Fujita H , Sakamoto N , Izumikawa K , Yamamoto Y , Kohno S , Hayashi T , Nagayasu T	Surg Today. 2011;41(10):1447-1449	2011	Embase; MEDLINE	Y	Less 50 patients
A modified technique for insertion of dual lumen bicaval cannulae for venovenous extracorporeal membrane oxygenation	Trimlett R H , Cordingley J J , Griffiths M J , Price S , Hunter D N , Finney S J	Intensive Care Med . 2011;37(6):1036-1037	2011	Embase; MEDLINE	Y	No Complications Reported
Costs associated with extracorporeal life support used in adults: A single-center study	Tseng Y -H, Wu M -Y, Tsai F -C, Chen H -J, Lin P J	Acta Cardiol Sin . 2011;27(4):221-228	2011	Embase	Y	V-A ECMO
Active rehabilitation and physical therapy during extracorporeal membrane oxygenation while awaiting lung transplantation: A practical approach	Turner D A , Cheifetz I M , Rehder K J , Williford W L , Bonadonna D , Banuelos S J , Peterson-Carmichael S , Lin S S , Davis R D , Zaas D	Crit Care Med . 2011;39(12):2593-2598	2011	Embase; MEDLINE	Y	Less 18yr
Extracorporeal membrane oxygenation for severe refractory respiratory failure secondary to 2009 H1N1 influenza A	Turner D A , Rehder K J , Peterson-Carmichael S L , Ozment C P , Al-Hegelan M S , Williford W L , Peters M A , Noble P W , Cheifetz I M	Respir Care. 2011;56(7):941-946	2011	Embase; MEDLINE	Y	Duplicate
Development of a collaborative program to provide extracorporeal membrane oxygenation for adults with refractory hypoxemia within the framework of a pandemic	Turner D A , Williford W L , Peters M A , Thalman J J , Shearer I R , Walczak Jr R J , Griffis M , Olson S A , Sowers K W , Govert J A , MacIntyre N R , Cheifetz I M	Pediatr Crit Care Med . 2011;12(4):426-430	2011	Embase; MEDLINE	Y	Duplicate
One case of nosocomial A(H1N1)v2009 influenza in Reunion Island	Vandroux D , Lugagne-Delpon N , Bossard G , Drouet D , Djourhi S , Jaffar-Bandjee M C , Henni T , Braunberger E , Champion S , Gauzere B -A	Bull Soc Pathol Exot . 2011;104(2):105-107	2011	MEDLINE	Y	Less 50 patients
Utilization patterns and patient outcomes associated with use of rescue therapies in acute lung injury	Walkey A J , Wiener R S	Crit Care Med . 2011;39(6):1322-1328	2011	Embase; MEDLINE	Y	No Complications Reported
Rescue extracorporeal membrane oxygenation in children with refractory cardiac arrest	Walter E M D , Alexi-Meskishvili V , Huebler M , Redlin M , Boettcher W , Weng Y , Berger F , Hetzer R	Interact Cardiovasc Thorac Surg . 2011;12(6):929-934	2011	Embase; MEDLINE	Y	Less 18yr
Extracorporeal membrane oxygenation as a bridge to lung transplantation in a patient with persistent severe porto-pulmonary arterial hypertension following liver transplantation	Wiklund L , Haraldsson A , Selimovic N , Kjellman U	Eur J Cardio-thorac Surg . 2011;39(5):777-778	2011	Embase; MEDLINE	Y	Less 50 patients
Extracorporeal membrane oxygenation for severe acute respiratory distress syndrome caused by novel 2009 influenza A (H1N1) virus	Zhan Q -Y, Sun B , Tong Z -H, Guo L -M, Xu L , Zhu X , Jia X -J, Wang C	Nat Med J China. 2011;91(46):3262-3266	2011	Embase; MEDLINE	Y	Not english
Ex vivo evaluation of lungs from donation after cardiac death after recent cardiac surgery with cardiopulmonary bypass	Zych B , Popov A F , Simon A R , Carby M , Redmond K	Transplant Proc . 2011;43(10):4029-4031	2011	Embase; MEDLINE	Y	No Complications Reported
Venovenous extracorporeal membrane oxygenation for acute lung failure in adults.	Schmid C, Philipp A, Hilker M, Rupprecht L, Arlt M, Keyser A, Lubnow M, MÃ¼ller T.	J Heart Lung Transplant. 2012 Jan;31(1):9-15. doi: 10.1016/j.healun.2011.07.013. Epub 2011 Sep 1.	2012	pubmed	Y	Duplicate
Outcomes of venovenous extracorporeal membrane oxygenation support for acute respiratory distress syndrome in adults.	Ma DS1, Kim JB, Jung SH, Choo SJ, Chung CH, Lee JW.	Korean J Thorac Cardiovasc Surg. 2012 Apr;45(2):91-4.	2012	Referenced	Y	Risk of Bias
Two years' experience with bicaval dual lumen cannula for venovenous extracorporeal membrane oxygenation in adult refractory acute respiratory distress syndrome	Reeb J , Falcoz P E , Pottecher J , Delabranche X , Santelmo N , Steib A , Hasselmann M , Massard G	Crit Care. 2012;16( ):S36-	2012	Embase	Y	Less 50 patients
First experience with the new portable extracorporeal membrane oxygenation system Cardiohelp for severe respiratory failure in adults.	Haneya A, Philipp A, Foltan M, Camboni D, MÃ¼eller T, Bein T, Schmid C, Lubnow M.	Perfusion. 2012 Mar;27(2):150-5. doi: 10.1177/0267659111432330. Epub 2012 Jan 16.	2012	pubmed	Y	Less 50 patients
Long-term quality of life in patients with acute respiratory distress syndrome requiring extracorporeal membrane oxygenation for refractory hypoxaemia	Hodgson C L , Hayes K , Everard T , Nichol A , Davies A R , Bailey M J , Tuxen D V , Cooper D J , Pellegrino V	Crit Care. 2012;16(5): -	2012	Embase	Y	Less 50 patients
Can initial inflammatory and coagulation parameters predict duration and outcome of VV-ECMO therapy in adults?	Rulisek J , Leden P , Zakharchenko M , Bartakova H , Belohlavek J , Kunstyr J , Balik M	Intensive Care Med . 2012;38( ):S259-	2012	Embase	Y	Less 50 patients
Growing experience with extracorporeal membrane oxygenation as a bridge to lung transplantation.	Shafii AE, Mason DP, Brown CR, Vakil N, Johnston DR, McCurry KR, Pettersson GB, Murthy SC.	ASAIO J. 2012 Sep-Oct;58(5):526-9. doi: 10.1097/MAT.0b013e31826417d8.	2012	pubmed	Y	Less 50 patients
Extracorporeal membrane oxygenation as a bridge to lung transplantation and recovery.	Javidfar J, Brodie D, Iribarne A, Jurado J, Lavelle M, Brenner K, Arcasoy S, Sonett J, Bacchetta M.	J Thorac Cardiovasc Surg. 2012 Sep;144(3):716-21. doi: 10.1016/j.jtcvs.2012.05.040. Epub 2012 Jul 15.	2012	pubmed	Y	Less 50 patients
Effect of pulmonary support using extracorporeal membrane oxygenation for adult liver transplant recipients with respiratory failure.	Park YH, Hwang S, Park HW, Park CS, Lee HJ, Namgoong JM, Yoon SY, Jung SW, Song GW, Park GC, Jung DH, Ahn CS, Kim KH, Moon DB, Ha TY, Lee SG.	Transplant Proc. 2012 Apr;44(3):757-61. doi: 10.1016/j.transproceed.2012.01.055.	2012	pubmed	Y	Less 50 patients
High-frequency oscillatory ventilation with and without arteriovenous extracorporeal lung assist in patients with severe respiratory failure	Kredel M , Brederlau J , Wunder C , Wurmb T E , Kranke P , Roewer N , Muellenbach R M	J Crit Care. 2012;27(2):182-191	2012	Embase; MEDLINE	Y	Less 50 patients
Extracorporeal membrane oxygenation for 2009 influenza A(H1N1) severe respiratory failure in Japan.	Takeda S, Kotani T, Nakagawa S, Ichiba S, Aokage T, Ochiai R, Taenaka N, Kawamae K, Nishimura M, Ujike Y, Tajimi K; Committee of Crisis Control, the Japanese Society of Respiratory Care Medicine and Committee of Pandemic H1N1 Surveillance, the Japanese Society of Intensive Care Medicine.	J Anesth. 2012 Oct;26(5):650-7. doi: 10.1007/s00540-012-1402-x. Epub 2012 May 23.	2012	pubmed	Y	Less 50 patients
Increased sedation requirements in patients receiving extracorporeal membrane oxygenation for respiratory and cardiorespiratory failure.	Shekar K, Roberts JA, Mullany DV, Corley A, Fisquet S, Bull TN, Barnett AG, Fraser JF.	Anaesth Intensive Care. 2012 Jul;40(4):648-55.	2012	pubmed	Y	Less 50 patients
Outcomes of the first 30 cases of an adult extracorporeal membrane oxygenation program: strategies to manage the learning curve" and implications for intensive care unit risk adjustment models."	Mullany DV, Bull TN, Hunt W, Shekar K, Thomson B, Fraser JF, Ziegenfuss M.	Crit Care Resusc. 2012 Jun;14(2):119-29.	2012	pubmed	Y	Less 50 patients
Extracorporeal membrane oxygenation for 2009 influenza A (H1N1) acute respiratory distress syndrome: single-centre experience with 1-year follow-up.	Beurtheret S, Mastroianni C, Pozzi M, D'Alessandro C, Luyt CE, Combes A, Pavie A, Leprince P.	Eur J Cardiothorac Surg. 2012 Mar;41(3):691-5. doi: 10.1093/ejcts/ezr082. Epub 2012 Jan 6.	2012	pubmed	Y	Less 50 patients
Extracorporeal membrane oxygenation in awake patients as bridge to lung transplantation.	Fuehner T1, Kuehn C, Hadem J, Wiesner O, Gottlieb J, Tudorache I, Olsson KM, Greer M, Sommer W, Welte T, Haverich A, Hoeper MM, Warnecke G.	Am J Respir Crit Care Med. 2012 Apr 1;185(7):763-8.	2012	Referenced	Y	Less 50 patients
Transportable extracorporeal lung support for rescue of severe respiratory failure in combat casualties.	Bein T, Zonies D, Philipp A, Zimmermann M, Osborn EC, Allan PF, Nerlich M, Graf BM, Fang R.	J Trauma Acute Care Surg. 2012 Dec;73(6):1450-6. doi: 10.1097/TA.0b013e3182782480. Erratum in: J Trauma Acute Care Surg. 2013 Mar;74(3):951.	2012	pubmed	Y	Less 50 patients
First-year experience of a Brazilian tertiary medical center in supporting severely ill patients using extracorporeal membrane oxygenation.	Park M, Azevedo LC, Mendes PV, Carvalho CR, Amato MB, Schettino GP, Tucci M, Maciel AT, Taniguchi LU, Barbosa EV, Nardi RO, IgnÃ¡cio Mde N, Machtans CC, Neves WA, Hirota AS, Costa EL.	Clinics (Sao Paulo). 2012 Oct;67(10):1157-63.	2012	pubmed	y	Less 50 patients
Portable miniaturized extracorporeal membrane oxygenation systems for H1N1-related severe acute respiratory distress syndrome: a case series.	Roncon-Albuquerque R Jr, BasÃ­lio C, Figueiredo P, Silva S, MergulhÃ£o P, Alves C, Veiga R, Castelo-Branco S, Paiva L, Santos L, Honrado T, Dias C, Oliveira T, Sarmento A, Mota AM, Paiva JA.	J Crit Care. 2012 Oct;27(5):454-63. doi: 10.1016/j.jcrc.2012.01.008. Epub 2012 Mar 3.	2012	pubmed	Y	Less 50 patients
Extracorporeal membrane oxygenation for critically ill patients with 2009 influenza A (H1N1)-related acute respiratory distress syndrome: preliminary experience from a single center.	Hou X, Guo L, Zhan Q, Jia X, Mi Y, Li B, Sun B, Hao X, Li H.	Artif Organs. 2012 Sep;36(9):780-6. doi: 10.1111/j.1525-1594.2012.01468.x. Epub 2012 Jul 2.	2012	pubmed	Y	Less 50 patients
Intensive pulmonary support using extracorporeal membrane oxygenation in adult patients undergoing liver transplantation.	Choi NK, Hwang S, Kim KW, Park GC, Yu YD, Jung SH, Park PJ, Choi YI, Song GW, Jung DH, Hong SK, Ahn CS, Kim KH, Moon DB, Ha TY, Lee SG.	Hepatogastroenterology. 2012 Jun;59(116):1189-93. doi: 10.5754/hge10125.	2012	pubmed	Y	Less 50 patients
The French airbridge for circulatory support in the Carribean.	Lebreton G, Sanchez B, Hennequin JL, ResiÃ¨re D, Hommel D, LÃ©onard C, Mehdaoui H, Roques F.	Interact Cardiovasc Thorac Surg. 2012 Sep;15(3):420-5. doi: 10.1093/icvts/ivs215. Epub 2012 Jun 1.	2012	pubmed	Y	Less 50 patients
Extracorporeal life support: first year of experience implementing the technique in Slovenia.	Golicnik A, Knezevic I, Racic M, Noc M, Gorjup V.	Int J Artif Organs. 2012 May;35(5):392-9. doi: 10.5301/ijao.5000083.	2012	pubmed	Y	Less 50 patients
Extracorporeal life support for pancreatitis-induced acute respiratory distress syndrome.	Bryner BS, Smith C, Cooley E, Bartlett RH, Mychaliska GB.	Ann Surg. 2012 Dec;256(6):1073-7. doi: 10.1097/SLA.0b013e31825d33c1.	2012	pubmed	Y	Less 50 patients
Image guided placement of extracorporeal life support through bi-caval dual lumen venovenous membrane oxygenation in an interventional radiology setting--initial experience.	de Bucourt M, TeichgrÃ¤ber UK.	J Vasc Access. 2012 Apr-Jun;13(2):221-5. doi: 10.5301/jva.5000033.	2012	pubmed	Y	Less 50 patients
Respiratory support including emergent extracorporeal membrane oxygenation as a bridge to airway dilatation following perioperative bronchial occlusion.	Thung AK, Hayes D Jr, Preston TJ, Tobias JD.	Middle East J Anesthesiol. 2012 Oct;21(6):879-88.	2012	pubmed	Y	Less 18yr
Respiratory failure after lung transplantation: extra-corporeal membrane oxygenation as a rescue treatment.	PÃªgo-Fernandes PM, Hajjar LA, Galas FR, Samano MN, Ribeiro AK, Park M, Soares R, Osawa E, Jatene FB.	Clinics (Sao Paulo). 2012 Dec;67(12):1529-32. No abstract available.	2012	pubmed	Y	Less 50 patients
Challenges in patients supported with extracorporeal membrane oxygenation in Brazil.	Mendes PV, Moura E, Barbosa EV, Hirota AS, Scordamaglio PR, Ajjar FM, Costa EL, Azevedo LC, Park M; ECMO Group.	Clinics (Sao Paulo). 2012 Dec;67(12):1511-5. No abstract available.	2012	pubmed	Y	Less 50 patients
[Extracorporeal membrane oxygenation for acute respiratory distress syndrome: a study of 11 cases].	Yan J, Zhou M, Zhu YH, Xu HY, Yang T, Chen JY.	Zhonghua Jie He He Hu Xi Za Zhi. 2012 Nov;35(11):809-13. Chinese.	2012	pubmed	Y	Not english
[The experience of extracorporeal membrane oxygenation for severe acute respiratory failure in adults].	Sun B, Wang CT, Wu J, Li XY, He HY, Zhang CY, Tong ZH, Zhan QY, Wang C.	Zhonghua Jie He He Hu Xi Za Zhi. 2012 Nov;35(11):804-8. Chinese.	2012	pubmed	Y	Not english
[The application of extracorporeal membrane oxygenation for severe acute respiratory failure in adults].	Li XY, Zhan QY.	Zhonghua Jie He He Hu Xi Za Zhi. 2012 Nov;35(11):802-3. Chinese. No abstract available.	2012	pubmed	Y	Not english
[Case report of anesthesia with veno-veno extracorporeal membrane oxygenation (V-V ECMO) during one-lung ventilation for acute respiratory distress syndrome (ARDS) complicated with severe sepsis due to spontaneous esophageal rupture].	Ono Y, Ohta Y, Matsumoto G, Kim S, Yokota H, Sakamoto A.	Masui. 2012 Oct;61(10):1137-40. Japanese.	2012	pubmed	Y	Less 50 patients
Repeated lung lavage with extracorporeal membrane oxygenation treating severe acute respiratory distress syndrome due to nasogastric tube malposition for enternal nutrition: a case report.	Kao X, Yu W, Zhu W, Li N, Li J.	Asia Pac J Clin Nutr. 2012;21(4):638-41.	2012	pubmed	Y	Less 50 patients
Arterial chimney graft cannulation for interventional lung assist.	BÃ¼rkle MA, Sodian R, Kaczmarek I, Weig T, Frey L, Irlbeck M, Dolch ME.	Ann Thorac Surg. 2012 Oct;94(4):1335-7. doi: 10.1016/j.athoracsur.2012.02.031.	2012	pubmed	Y	Less 50 patients
Extracorporeal lung assist might avoid invasive ventilation in exacerbation of COPD.	Brederlau J, Wurmb T, Wilczek S, Will K, Maier S, Kredel M, Roewer N, Muellenbach RM.	Eur Respir J. 2012 Sep;40(3):783-5. doi: 10.1183/09031936.00006012. No abstract available.	2012	pubmed	Y	Less 50 patients
Activated partial thromboplastin time is a better trending tool in pediatric extracorporeal membrane oxygenation.	Maul TM, Wolff EL, Kuch BA, Rosendorff A, Morell VO, Wearden PD.	Pediatr Crit Care Med. 2012 Nov;13(6):e363-71. doi: 10.1097/PCC.0b013e31825b582e.	2012	pubmed	Y	Less 18yr
Subclavian artery cannulation for venoarterial extracorporeal membrane oxygenation.	Javidfar J, Brodie D, Costa J, Miller J, Jurrado J, LaVelle M, Newmark A, Takayama H, Sonett JR, Bacchetta M.	ASAIO J. 2012 Sep-Oct;58(5):494-8. doi: 10.1097/MAT.0b013e318268ea15.	2012	pubmed	Y	V-A ECMO
Hypoxic cardiac arrest in pregnancy due to pulmonary haemorrhage.	Grimme I, Winter R, Kluge S, Petzoldt M.	BMJ Case Rep. 2012 Aug 24;2012. doi:pii: bcr2012006741. 10.1136/bcr-2012-006741.	2012	pubmed	Y	Less 50 patients
One hundred ten days of extracorporeal membrane oxygenation in a young woman with postpartum cerebral venous thrombosis and acute respiratory distress syndrome.	Strecker T, MÃ¼nch F, Weyand M.	Heart Surg Forum. 2012 Aug;15(4):180-E181. doi: 10.1532/HSF98.20111068.	2012	pubmed	Y	Less 50 patients
Extracorporeal membrane oxygenation in a nonintubated patient with acute respiratory distress syndrome.	Wiesner O, Hadem J, Sommer W, KÃ¼hn C, Welte T, Hoeper MM.	Eur Respir J. 2012 Nov;40(5):1296-8. doi: 10.1183/09031936.00076912. Epub 2012 Aug 9. No abstract available.	2012	pubmed	Y	Less 50 patients
Predictors of mortality in patients successfully weaned from extracorporeal membrane oxygenation.	Chang WW, Tsai FC, Tsai TY, Chang CH, Jenq CC, Chang MY, Tian YC, Hung CC, Fang JT, Yang CW, Chen YC.	PLoS One. 2012;7(8):e42687. doi: 10.1371/journal.pone.0042687. Epub 2012 Aug 1.	2012	pubmed	Y	No Complications Reported
Extracorporeal membrane oxygenation for extremely complicated scrub typhus.	Oh WS, Yie K.	ASAIO J. 2012 Sep-Oct;58(5):540-1. doi: 10.1097/MAT.0b013e31825f336f.	2012	pubmed	Y	Less 50 patients
Report of two cases of ARDS patients treated with pumpless extracorporeal interventional lung assist.	Coscia AP, Cunha HF, Longo AG, Martins EG, Saddy F, Japiassu AM.	J Bras Pneumol. 2012 May-Jun;38(3):408-11. English, Portuguese. No abstract available.	2012	pubmed	Y	Less 50 patients
[Pulmonary resection and ECMO: A salvage therapy for penetrating lung trauma].	Incagnoli P, Blaise H, Mathey C, Vinclair M, Albaladejo P.	Ann Fr Anesth Reanim. 2012 Jul-Aug;31(7-8):641-3. doi: 10.1016/j.annfar.2012.03.010. Epub 2012 Jul 4. French.	2012	pubmed	Y	Less 50 patients
Successful treatment of a life-threatening air leakage, complicating severe abdominal sepsis, with a one-way endobronchial valve.	Brichon PY, Poquet C, Arvieux C, Pison C.	Interact Cardiovasc Thorac Surg. 2012 Oct;15(4):779-80. Epub 2012 Jul 3.	2012	pubmed	Y	Less 50 patients
The morbidity and mortality of patients with fungal infections before and during extracorporeal membrane oxygenation support.	Pluim T, Halasa N, Phillips SE, Fleming G.	Pediatr Crit Care Med. 2012 Sep;13(5):e288-93. doi: 10.1097/PCC.0b013e31824fbaf7.	2012	pubmed	Y	Less 18yr
Acute respiratory distress syndrome related to influenza A H1N1 infection: correlation of pulmonary computed tomography findings to extracorporeal membrane oxygenation treatment and clinical outcome.	Lazoura O, Parthipun AA, Roberton BJ, Downey K, Finney S, Padley S.	J Crit Care. 2012 Dec;27(6):602-8. doi: 10.1016/j.jcrc.2012.04.009. Epub 2012 Jun 12.	2012	pubmed	Y	No Complications Reported
Prolonged heparin-free extracorporeal membrane oxygenation in multiple injured acute respiratory distress syndrome patients with traumatic brain injury.	Muellenbach RM, Kredel M, Kunze E, Kranke P, Kuestermann J, Brack A, Gorski A, Wunder C, Roewer N, Wurmb T.	J Trauma Acute Care Surg. 2012 May;72(5):1444-7. doi: 10.1097/TA.0b013e31824d68e3.	2012	pubmed	Y	Less 50 patients
Extracorporeal membrane oxygenation promotes survival in children with trauma related respiratory failure.	Skarda D, Henricksen JW, Rollins M.	Pediatr Surg Int. 2012 Jul;28(7):711-4. doi: 10.1007/s00383-012-3102-x. Epub 2012 May 13.	2012	pubmed	Y	Less 18yr
Emergency extracorporeal membrane oxygenation to treat massive aspiration during anaesthesia induction. A case report.	Wetsch WA, SpÃ¶hr FA, Hinkelbein J, Padosch SA.	Acta Anaesthesiol Scand. 2012 Jul;56(6):797-800. doi: 10.1111/j.1399-6576.2012.02697.x. Epub 2012 May 9.	2012	pubmed	Y	Less 50 patients
Left tilt position for easy extracorporeal membrane oxygenation cannula insertion in late pregnancy patients.	Ngatchou W, Ramadan AS, Van Nooten G, Antoine M.	Interact Cardiovasc Thorac Surg. 2012 Aug;15(2):285-7. doi: 10.1093/icvts/ivs142. Epub 2012 Apr 23.	2012	pubmed	Y	Less 50 patients
Right ventricular rupture and tamponade caused by malposition of the Avalon cannula for venovenous extracorporeal membrane oxygenation.	Hirose H, Yamane K, Marhefka G, Cavarocchi N.	J Cardiothorac Surg. 2012 Apr 20;7:36. doi: 10.1186/1749-8090-7-36.	2012	pubmed	Y	Less 50 patients
Venovenous extracorporeal membrane oxygenation in adults: practical aspects of circuits, cannulae, and procedures.	Sidebotham D, Allen SJ, McGeorge A, Ibbott N, Willcox T.	J Cardiothorac Vasc Anesth. 2012 Oct;26(5):893-909. doi: 10.1053/j.jvca.2012.02.001. Epub 2012 Apr 13. Review. No abstract available.	2012	pubmed	Y	Review / M-A
[A 10,000 km long airborne medical evacuation of a patient under ECLS].	Roy V, Jabot J, Bouchet B, Delambre JF, Vandroux D.	Ann Fr Anesth Reanim. 2012 May;31(5):495-6. doi: 10.1016/j.annfar.2012.02.012. Epub 2012 Apr 12. French. No abstract available.	2012	pubmed	Y	Less 50 patients
Emergency bedside extracorporeal membrane oxygenation for rescue of acute tracheal obstruction.	Willms DC, Mendez R, Norman V, Chammas JH.	Respir Care. 2012 Apr;57(4):646-9. doi: 10.4187/respcare.01417. Review.	2012	pubmed	Y	Less 50 patients
Massive haemoptysis on veno-arterial extracorporeal membrane oxygenation.	Harrison M, Cowan S, Cavarocchi N, Hirose H.	Eur J Cardiothorac Surg. 2012 Sep;42(3):587-9. doi: 10.1093/ejcts/ezs156. Epub 2012 Mar 30.	2012	pubmed	Y	Less 50 patients
Trends in and perspectives on extracorporeal membrane oxygenation for severe adult respiratory failure.	Sadahiro T, Oda S, Nakamura M, Hirayama Y, Watanabe E, Tateishi Y, Shinozaki K.	Gen Thorac Cardiovasc Surg. 2012 Apr;60(4):192-201. doi: 10.1007/s11748-011-0868-z. Epub 2012 Mar 28. Review.	2012	pubmed	Y	Review / M-A
Prolonged use of extracorporeal membrane oxygenation combined with prone positioning in patients with acute respiratory distress syndrome and invasive Aspergillosis.	Otterspoor LC, Smit FH, van Laar TJ, Kesecioglu J, van Dijk D.	Perfusion. 2012 Jul;27(4):335-7. doi: 10.1177/0267659112442098. Epub 2012 Mar 21.	2012	pubmed	Y	Less 50 patients
Extracorporeal membrane oxygenation with plasma exchange in a patient with alveolar haemorrhage secondary to Wegener's granulomatosis.	Barnes SL, Naughton M, Douglass J, Murphy D.	Intern Med J. 2012 Mar;42(3):341-2. doi: 10.1111/j.1445-5994.2012.02720.x. No abstract available.	2012	pubmed	Y	Less 50 patients
Clinical experience of extracorporeal membrane oxygenation for acute respiratory distress syndrome associated with pneumonia in children.	Peng CC, Wu SJ, Chen MR, Chiu NC, Chi H.	J Formos Med Assoc. 2012 Mar;111(3):147-52. doi: 10.1016/j.jfma.2011.01.006. Epub 2012 Feb 22.	2012	pubmed	Y	Less 18yr
20-year experience of prolonged extracorporeal membrane oxygenation in critically ill children with cardiac or pulmonary failure.	Gupta P, McDonald R, Chipman CW, Stroud M, Gossett JM, Imamura M, Bhutta AT.	Ann Thorac Surg. 2012 May;93(5):1584-90. doi: 10.1016/j.athoracsur.2012.01.008. Epub 2012 Mar 14.	2012	pubmed	Y	Less 18yr
ARDS secondary to descending necrotizing mediastinitis treated by long-term extracorporeal respiratory support.	Franchi F, Silvestri R, Cubattoli L, Voltolini L, Mazzei MA, Giomarelli P.	Respir Care. 2012 Nov;57(11):1970-3. doi: 10.4187/respcare.01531. Epub 2012 Mar 13. No abstract available.	2012	pubmed	Y	Less 50 patients
Strategies for the withdrawal of extracorporeal membrane oxygenation for severe acute respiratory failure support: a new challenge?	Muller G, Guillon A, Garot D, Mercier E, Perrotin D.	Anaesth Intensive Care. 2012 Mar;40(2):359. No abstract available.	2012	pubmed	Y	Less 50 patients
Extracorporeal membrane oxygenation in severe hypoxemia: time for reappraisal?	Azevedo LC, Park M, Costa EL, Santos EV, Hirota A, Taniguchi LU, Schettino Gde P, Amato MB, Carvalho CR; Extracorporeal Support Study Group.	J Bras Pneumol. 2012 Jan-Feb;38(1):7-12. English, Portuguese.	2012	pubmed	Y	Less 50 patients
Use of extracorporeal respiratory support during pregnancy: a case report and literature review.	Grasselli G, Bombino M, Patroniti N, Giuffrida A, Marcolin R, Vergani P, Pesenti A.	ASAIO J. 2012 May-Jun;58(3):281-4. doi: 10.1097/MAT.0b013e318249695d. Review.	2012	pubmed	Y	Less 50 patients
Treatment of sepsis and ARDS with extracorporeal membrane oxygenation and interventional lung assist membrane ventilator in a patient with acute lymphoblastic leukemia.	Gorjup V, Fister M, Noc M, Rajic V, Ribaric SF.	Respir Care. 2012 Jul;57(7):1178-81. doi: 10.4187/respcare.01393. Epub 2012 Feb 24.	2012	pubmed	Y	Less 50 patients
Factors predicting early- and long-term survival in patients undergoing extracorporeal membrane oxygenation (ECMO).	Lee SH, Chung CH, Lee JW, Jung SH, Choo SJ.	J Card Surg. 2012 Mar;27(2):255-63. doi: 10.1111/j.1540-8191.2011.01400.x. Epub 2012 Feb 26.	2012	pubmed	Y	No Complications Reported
Acute respiratory distress syndrome: evaluation and management.	CortÃ©s I, PeÃ±uelas O, Esteban A.	Minerva Anestesiol. 2012 Mar;78(3):343-57. Review.	2012	pubmed	Y	Review / M-A
Impact of extracorporeal membrane oxygenation and continuous venovenous hemodiafiltration on the pharmacokinetics of oseltamivir carboxylate in critically ill patients with pandemic (H1N1) influenza.	Lemaitre F, Luyt CE, Roullet-Renoleau F, Nieszkowska A, Zahr N, Corvol E, Fernandez C, Antignac M, Farinotti R, Combes A.	Ther Drug Monit. 2012 Apr;34(2):171-5. doi: 10.1097/FTD.0b013e318248672c.	2012	pubmed	Y	No Complications Reported
[Extracorporeal lung support in patients with severe respiratory failure secondary to the 2010-2011 winter seasonal outbreak of influenza A (H1N1) in Spain].	Bonastre J, Suberviola B, Pozo JC, Guerrero JE, Torres A, RodrÃ­guez A, MartÃ­n-Loeches I; SEMICYUC-CIBERES-REIPI working group.	Med Intensiva. 2012 Apr;36(3):193-9. doi: 10.1016/j.medin.2011.12.004. Epub 2012 Feb 15. Spanish.	2012	pubmed	Y	Not english
[The application of extracorporeal membrane oxygenation in critically ill patient].	Li HL, Meng C, Zhu X, Guo LM, Li BS.	Zhongguo Wei Zhong Bing Ji Jiu Yi Xue. 2012 Feb;24(2):86-9. Chinese.	2012	pubmed	Y	Not english
[Use of extracorporeal membrane oxygenation in adults with acute respiratory distress syndrome: a meta-analysis].	Cai SX, Liu SQ, Qiu XH, Huang YZ, Yang Y, Qiu HB.	Zhongguo Wei Zhong Bing Ji Jiu Yi Xue. 2012 Feb;24(2):78-82. Chinese.	2012	pubmed	Y	Review / M-A
[Clinical observation of therapeutic effect of extracorporeal membrane oxygenation in patients with acute respiratory distress syndrome].	Wang CH, Tong ZH, Zhan QY, Sun B, Quan JY, Li CH.	Zhongguo Wei Zhong Bing Ji Jiu Yi Xue. 2012 Feb;24(2):83-5. Chinese.	2012	pubmed	Y	Not english
Extracorporeal membrane oxygenation cannulation trends for pediatric respiratory failure and central nervous system injury.	Rollins MD, Hubbard A, Zabrocki L, Barnhart DC, Bratton SL.	J Pediatr Surg. 2012 Jan;47(1):68-75. doi: 10.1016/j.jpedsurg.2011.10.017.	2012	pubmed	Y	Less 18yr
Single site venovenous extracorporeal membrane oxygenation as an alternative to invasive ventilation in post-pneumonectomy fistula with acute respiratory failure.	Fica M, SuÃ¡rez F, Aparicio R, SuÃ¡rez C.	Eur J Cardiothorac Surg. 2012 Apr;41(4):950-2. doi: 10.1093/ejcts/ezr103. Epub 2011 Dec 16.	2012	pubmed	Y	Less 50 patients
Lack of effect of extracorporeal membrane oxygenation on tigecycline pharmacokinetics.	Veinstein A, Debouverie O, GrÃ©goire N, Goudet V, Adier C, Robert R, Couet W.	J Antimicrob Chemother. 2012 Apr;67(4):1047-8. doi: 10.1093/jac/dkr550. Epub 2011 Dec 29. No abstract available.	2012	pubmed	Y	Less 50 patients
[Acute respiratory distress syndrome secondary to influenza A (H1N1) infection: a report of a case].	Chouaib N, Bensghir M, Chouikh C, Chkoura K, Azendour H, Balkhi H, Haimeur C, Drissi Kamili N.	Rev Pneumol Clin. 2012 Jun;68(3):209-12. doi: 10.1016/j.pneumo.2011.09.002. Epub 2011 Dec 27. French.	2012	pubmed	Y	Less 50 patients
Extracorporeal membrane oxygenation for respiratory failure in adults.	Combes A, Bacchetta M, Brodie D, MÃ¼ller T, Pellegrino V.	Curr Opin Crit Care. 2012 Feb;18(1):99-104. doi: 10.1097/MCC.0b013e32834ef412. Review.	2012	pubmed	Y	Review / M-A
Double lumen bi-cava cannula for veno-venous extracorporeal membrane oxygenation as bridge to lung transplantation in non-intubated patient.	Reeb J, Falcoz PE, Santelmo N, Massard G.	Interact Cardiovasc Thorac Surg. 2012 Jan;14(1):125-7. doi: 10.1093/icvts/ivr046. Epub 2011 Nov 17.	2012	pubmed	Y	Less 50 patients
Ambulatory venovenous extracorporeal respiratory support as a bridge for cystic fibrosis patients to emergent lung transplantation.	Hayes D Jr, Kukreja J, Tobias JD, Ballard HO, Hoopes CW.	J Cyst Fibros. 2012 Jan;11(1):40-5. doi: 10.1016/j.jcf.2011.07.009. Epub 2011 Oct 26.	2012	pubmed	Y	Less 50 patients
Prone and ECMO - a contradiction per se?	Litmathe J, Sucker C, Easo J, Wigger L, Dapunt O.	Perfusion. 2012 Jan;27(1):78-82. doi: 10.1177/0267659111424640. Epub 2011 Oct 4.	2012	pubmed	Y	Less 50 patients
Rescue therapy with a pumpless extracorporeal lung assist device in a patient with acute interstitial lung disease and severe refractory hypercapnia.	Petzoldt M, Braune S, Bittmann I, Kluge S.	Respir Care. 2012 Feb;57(2):293-7. doi: 10.4187/respcare.01290. Epub 2011 Jul 12.	2012	pubmed	Y	Less 50 patients
Extracorporeal membrane oxygenation for refractory, life-threatening, and herpes simplex virus 1-induced acute respiratory distress syndrome. Our experience and literature review.	Bonacchi M, Di Lascio G, Harmelin G, Pasquini A, Peris A, Sani G.	Am J Emerg Med. 2012 Jul;30(6):1014.e3-1014.e10. doi: 10.1016/j.ajem.2011.04.011. Epub 2011 Jun 12. Review.	2012	pubmed	Y	Less 50 patients
Long-term extracorporeal membrane oxygenation with minimal ventilatory support: a new paradigm for severe ARDS?	Mauri T, Foti G, Zanella A, Bombino M, Confalonieri A, Patroniti N, Bellani G, Pesenti A.	Minerva Anestesiol. 2012 Mar;78(3):385-9.	2012	pubmed	Y	Less 50 patients
Extracorporeal carbon dioxyde removal for additional pulmonary resection after pneumonectomy.	Iacovazzi M, Oreste N, Sardelli P, Barrettara B, Grasso S.	Minerva Anestesiol. 2012 Mar;78(3):381-4.	2012	pubmed	Y	Less 50 patients
Successful weaning from extracorporal circulation using a pumpless extracorporal lung assist device in a patient with intraoperative hypercapnic lung failure during aortic valve replacement.	Wilbring M, Petzoldt M, Gulbins H, Goetz AE, Reichenspurner H.	Thorac Cardiovasc Surg. 2012 Jun;60(4):299-301. doi: 10.1055/s-0030-1270945. Epub 2011 Mar 25. Erratum in: Thorac Cardiovasc Surg. 2012 Jun;60(4):E1.	2012	pubmed	Y	Less 50 patients
Technological advances in extracorporeal membrane oxygenation for respiratory failure.	Rehder KJ1, Turner DA, Bonadonna D, Walczak RJ, Rudder RJ, Cheifetz IM.	Expert Rev Respir Med. 2012 Aug;6(4):377-84	2012	Referenced	Y	Duplicate
Technological advances in extracorporeal membrane oxygenation for respiratory failure.	Rehder KJ1, Turner DA, Bonadonna D, Walczak RJ, Rudder RJ, Cheifetz IM.	Expert Rev Respir Med. 2012 Aug;6(4):377-84.	2012	Referenced	Y	Review / M-A
Contemporary extracorporeal membrane oxygenation for adult respiratory failure: life support in the new era.	MacLaren G1, Combes A, Bartlett RH.	Intensive Care Med. 2012 Feb;38(2):210-20.	2012	Referenced	Y	Review / M-A
Role and potentials of low-flow CO(2) removal system in mechanical ventilation.	Terragni P1, Maiolo G, Ranieri VM.	Curr Opin Crit Care. 2012 Feb;18(1):93-8	2012	Referenced	Y	Review / M-A
Extracorporeal membrane oxygenation-rescue therapy for status asthmaticus	Alappan N , Eisen L , Jakobleff W , Shiloh A	Chest. 2012;142(4): -	2012	Embase	Y	Less 50 patients
Unexpected fatal pneumonia in an immunocompetent adult: A tale of a father and a son	Ananthanarayanan V , Mueller J , Taxy J , Tesic V	J Clin Microbiol . 2012;50(10):3151+3414-3151+3414	2012	Embase	Y	Less 50 patients
Predictors of increased transfusion requirements and optimizing transfusion support in patients on extracorporeal membrane oxygenation (ECMO)	Ang A. L.	Vox Sang . 2012;103( ):10-11	2012	Embase	Y	Duplicate
Extracorporeal membrane oxygenation in severe hypoxemia: Time for reappraisal?	Azevedo L C P , Park M , Costa E L V , Santos E V , Hirota A , Taniguchi L U , Schettino G P P , Amato M B P , Carvalho C R R	J Bras Pneumol . 2012;38(1):7-12	2012	MEDLINE	Y	Duplicate
Comparing the clinical severity of the first versus second wave of 2009 Influenza A (H1N1) in a New York City pediatric healthcare facility	Baird J S , Buet A , Hymes S R , Ravindranath T M , Zackai S , Cannon J -M, Messina M , Sury J , Green R , Della-Latta P , Jenkins S G , Greenwald B M , Furuya E Y , Graham P L , Sonnett F M , Platt S , Delamora P , Saiman L	Pediatr Crit Care Med . 2012;13(4):375-380	2012	Embase; MEDLINE	Y	Less 18yr
6 Months of "Temporary" Support by Levitronix Left Ventricular Assist Device	Barbone A , Malvindi P G , Sorabella R A , Cortis G , Tosi P F , Basciu A , Ferrara P , Raffa G , Citterio E , Settepani F , Ornaghi D , Tarelli G , Vitali E	Artif Organs. 2012;36(7):639-642	2012	Embase; MEDLINE	Y	V-A ECMO
Transportable extracorporeal lung support for rescue of severe respiratory failure in combat casualties	Bein T , Zonies D , Philipp A , Zimmermann M , Osborn E C , Allan P F , Nerlich M , Graf B M , Fang R	J Trauma Acute Care Surg . 2012;73(6):1450-1456	2012	Embase; MEDLINE	Y	Duplicate
Emergency physician-initiated extracorporeal cardiopulmonary resuscitation	Bellezzo J M , Shinar Z , Davis D P , Jaski B E , Chillcott S , Stahovich M , Walker C , Baradarian S , Dembitsky W	Resuscitation. 2012;83(8):966-970	2012	Embase; MEDLINE	Y	V-A ECMO
Extracorporeal membrane oxygenation for 2009 influenza A (H1N1) acute respiratory distress syndrome: Single-centre experience with 1-year follow-up	Beurtheret S , Mastroianni C , Pozzi M , D'Alessandro C , Luyt C -E, Combes A , Pavie A , Leprince P	Eur J Cardio-thorac Surg . 2012;41(3):691-695	2012	Embase; MEDLINE	Y	Duplicate
Superimposed high-frequency jet ventilation combined with continuous positive airway pressure/assisted spontaneous breathing improves oxygenation in patients with H1N1-associated ARDS	Bingold T M , Scheller B , Wolf T , Meier J , Koch A , Zacharowski K , Rosenberger P , Iber T	Ann Intensive Care. 2012;2(1):1-5	2012	Embase	Y	No Complications Reported
Extracorporeal membrane oxygenation for refractory, life-threatening, and herpes simplex virus 1-induced acute respiratory distress syndrome. Our experience and literature review.	Bonacchi M , Di Lascio G , Harmelin G , Pasquini A , Peris A , Sani G	Am J Emerg Med . 2012;30(6):1014.e3: 1014.e10-1014.e3: 1014.e10	2012	MEDLINE	Y	Less 50 patients
The authors reply	Brodie D , Bacchetta M	New Engl J Med . 2012;366(6):576-	2012	Embase	Y	No Complications Reported
Prolonged extracorporeal membrane oxygenation for children with respiratory failure	Brogan T V , Zabrocki L , Thiagarajan R R , Rycus P T , Bratton S L	Pediatr Crit Care Med . 2012;13(4):e249: e254-e249: e254	2012	Embase; MEDLINE	Y	Less 18yr
Arterial chimney graft cannulation for interventional lung assist	Burkle M A , Sodian R , Kaczmarek I , Weig T , Frey L , Irlbeck M , Dolch M E	Ann Thorac Surg . 2012;94(4):1335-1337	2012	Embase; MEDLINE	Y	Less 50 patients
Extracorporeal membrane oxygenation for ARDS in adults [7]	Buscher H , Nair P	New Engl J Med . 2012;366(6):575-	2012	Embase; MEDLINE	Y	No clinical data
Advantages and limitations of the novel single site vs. the standard two site access for veno-venous extracorporeal membrane oxygenation (vvECMO) in adults. The Regensburg experience	Camboni D , Philipp A , Haneya A , Florchinger B , Rupprecht L , Muller T , Schmid C	Thorac Cardiovasc Surg . 2012;60( ): -	2012	Embase	Y	No Complications Reported
Using bedside transthoracic echocardiography for the placement of a double lumen bicaval venovenous extracorporeal membrane oxygenation (VV ECMO) cannula	Carlese A , Jakobleff W , Weinstein S , Shiloh A , Leung S	Crit Care Med . 2012;40(12):269-	2012	Embase	Y	Duplicate
Vasopressin rescue for in-pediatric intensive care unit cardiopulmonary arrest refractory to initial epinephrine dosing: A prospective feasibility pilot trial	Carroll T G , Dimas V V , Raymond T T	Pediatr Crit Care Med . 2012;13(3):265-272	2012	Embase; MEDLINE	Y	Less 18yr
Successful salvage treatment of steroid-refractory bronchiolar COP with low-dose macrolides	Chang W J , Lee E J , Lee S Y , In K H , Kim C H , Kim H -K, Park S	Pathol Int . 2012;62(2):144-148	2012	Embase; MEDLINE	Y	No clinical data
Predictors of mortality in patients successfully weaned from extracorporeal membrane oxygenation	Chang W -W, Tsai F -C, Tsai T -Y, Chang C -H, Jenq C -C, Chang M -Y, Tian Y -C, Hung C -C, Fang J -T, Yang C -W, Chen Y -C	PLoS ONE. 2012;7(8): -	2012	Embase; MEDLINE	Y	V-A ECMO
Intensive pulmonary support using extracorporeal membrane oxygenation in adult patients undergoing liver transplantation	Choi N -K, Hwang S , Kim K -W, Park G -C, Yu Y -D, Jung S -H, Park P -J, Choi Y -I, Song G -W, Jung D -H, Hong S -K, Ahn C -S, Kim K -H, Moon D -B, Ha T -Y, Lee S -G	Hepato-Gastroenterology. 2012;59(116):1189-1193	2012	Embase; MEDLINE	Y	Duplicate
Outcome of patients with profound Cardiogenic shock after cardiopulmonary resuscitation and prompt extracorporeal membrane oxygenation support-a single-center observational study	Chung S -Y, Sheu J -J, Lin Y -J, Sun C -K, Chang L -T, Chen Y -L, Tsai T -H, Chen C -J, Yang C -H, Hang C -L, Leu S , Wu C -J, Lee F -Y, Yip H -K	Circ J . 2012;76(6):1385-1392	2012	Embase; MEDLINE	Y	V-A ECMO
Myocardial infarction due to a retained epicardial pacing wire	Cohen S B , Bartz P J , Earing M G , Sheil A , Nicolosi A , Woods R K	Ann Thorac Surg . 2012;94(5):1724-1726	2012	Embase; MEDLINE	Y	No clinical data
Extracorporeal membrane oxygenation for respiratory failure in adults	Combes A , Bacchetta M , Brodie D , Muller T , Pellegrino V	Curr Opin Crit Care. 2012;18(1):99-104	2012	Embase; MEDLINE	Y	Duplicate
Report of two cases of ARDS patients treated with pumpless extracorporeal interventional lung assist	Coscia A P , Ramos H F C , Longo A G , Martins E G S , Saddy F , Japiassu A M	J Bras Pneumol . 2012;38(3):408-411	2012	MEDLINE	Y	Less 50 patients
Veno-arterial extracorporeal membrane oxygenation in an adolescent with a mediastinal mass	Creel A , LaRochelle J , Beard N , Ghaly M	J Invest Med . 2012;60(1):320-321	2012	Embase	Y	V-A ECMO
A new supportive therapy for adult respiratory distress syndrome: Interventional lung assist device	Cukurova Z , Eren G , Hergunsel O , Altun D , Kusku A , CetIngok H , Polat Y , Zeydan A , Durdu B , Akgul A	Turk Klinikleri J Med Sci . 2012;32(1):294-300	2012	Embase	Y	Not english
Successful treatment of Chlamydophila pneumoniae acute respiratory distress syndrome with extracorporeal membrane oxygenator: A case report and diagnostic review	De Bels D , Gottignies P , Reynders M , Roques S , Wilmin S , Deyi V -Y M , Jamart S , Devriendt J	J Med Case Rep . 2012;6( ): -	2012	Embase	Y	Less 50 patients
Case 40-2012: A 43-year-old woman with cardiorespiratory arrest after a cesarean section	Ecker J L , Solt K , Fitzsimons M G , MacGillivray T E	New Engl J Med . 2012;367(26):2528-2536	2012	Embase	Y	V-A ECMO
A bad experience with endovascular treatment of an aortobronchial fistula	Eldien A S , Deo S , Nichols III F C , Greason K L	Ann Thorac Surg . 2012;93(2):650-651	2012	Embase; MEDLINE	Y	Less 50 patients
Single site venovenous extracorporeal membrane oxygenation as an alternative to invasive ventilation in post-pneumonectomy fistula with acute respiratory failure	Fica M , Suarez F , Aparicio R , Suarez S	Eur J Cardio-thorac Surg . 2012;41(4):950-952	2012	Embase; MEDLINE	Y	Less 50 patients
ARDS secondary to descending necrotizing mediastinitis treated by long-term extracorporeal respiratory support	Franchi F , Silvestri R , Cubattoli L , Voltolini L , Mazzei M A , Giomarelli P	Respir Care. 2012;57(11):1970-1973	2012	Embase; MEDLINE	Y	Less 50 patients
Extracorporeal membrane oxygenation in awake patients as bridge to lung transplantation	Fuehner T , Kuehn C , Hadem J , Wiesner O , Gottlieb J , Tudorache I , Olsson K M , Greer M , Sommer W , Welte T , Haverich A , Hoeper M M , Warnecke G	Am J Respir Crit Care Med . 2012;185(7):763-768	2012	Embase; MEDLINE	Y	Duplicate
Immunohistochemical findings of an autopsied lung specimen from a patient with pandemic influenza (A/H1N1pdm) virus infection	Fujita J , Higa H , Azuma M , Kin M , Kakazu K , Toume M , Nakazato I , Cash H L , Higa F , Tateyama M , Tsutsumi Y , Ohtsuki Y	Intern Med . 2012;51(5):507-512	2012	Embase; MEDLINE	Y	Less 50 patients
Extracorporeal life support: First year of experience implementing the technique in Slovenia	Golicnik A , Knezevic I , Racic M , Noc M , Gorjup V	Int J Artif Organs. 2012;35(5):392-399	2012	Embase; MEDLINE	Y	Duplicate
Treatment of sepsis and ARDS with extracorporeal membrane oxygenation and interventional lung assist membrane ventilator in a patient with acute lymphoblastic leukemia	Gorjup V , Fister M , Noc M , Rajic V , Ribaric S F	Respir Care. 2012;57(7):1178-1181	2012	Embase; MEDLINE	Y	Duplicate
Hypoxic cardiac arrest in pregnancy due to pulmonary haemorrhage	Grimme I , Winter R , Kluge S , Petzoldt M	BMJ Case Rep . 2012; ( ): -	2012	Embase; MEDLINE	Y	Duplicate
A strategy based on galactomannan antigen detection and PCR for invasive pulmonary aspergillosis following influenza A (H1N1) pneumonia	Guervilly C , Roch A , Ranque S , Forel J -M, Hraiech S , Xeridat F , Adda M , Papazian L	J Infect . 2012;65(5):470-473	2012	Embase; MEDLINE	Y	No Complications Reported
20-year experience of prolonged extracorporeal membrane oxygenation in critically III children with cardiac or pulmonary failure	Gupta P , McDonald R , Chipman C W , Stroud M , Gossett J M , Imamura M , Bhutta A T	Ann Thorac Surg . 2012;93(5):1584-1591	2012	Embase; MEDLINE	Y	Less 18yr
Left tilt position for cardiopulmonary bypass in parturient patients	Hajj-Chahine J , Jayle C , Tomasi J , Corbi P	Interact Cardiovasc Thorac Surg . 2012;15(2):287-	2012	Embase	Y	No Complications Reported
First experience with the new portable extracorporeal membrane oxygenation system Cardiohelp for severe respiratory failure in adults	Haneya A , Philipp A , Foltan M , Camboni D , Mueller T , Bein T , Schmid C , Lubnow M	Perfusion. 2012;27(2):150-155	2012	Embase; MEDLINE	Y	Duplicate
First experience with the new portable miniaturized extracorporeal membrane oxygenation system Cardiohelp for severe respiratory failure in adults	Haneya A , Philipp A , Foltan M , Mueller T , Lubnow M , Camboni D , Schmid C	Thorac Cardiovasc Surg . 2012;60( ): -	2012	Embase	Y	Duplicate
Ambulatory venovenous extracorporeal respiratory support as a bridge for cystic fibrosis patients to emergent lung transplantation	Hayes D , Kukreja J , Tobias J D , Ballard H O , Hoopes C W	J Cyst Fibrosis. 2012;11(1):40-45	2012	Embase; MEDLINE	Y	Duplicate
Severe mycoplasma pneumoniae infection with extensive upper airway involvement requiring prolonged extracorporeal membrane oxygenation	Hopkins M , Montgomery G , Patel V , Rabi F	Crit Care Med . 2012;40(12):321-	2012	Embase	Y	Less 50 patients
Air Transported Pediatric Rescue Extracorporeal Membrane Oxygenation: A Single Institutional Review	Horne D , Lee J J , Maas M , Divekar A , Kesselman M , Drews T , Veroukis S , Hancock B J , Hiebert B , Cronin G , Soni R	World J Pediatr Congenit Heart Surg . 2012;3(2):236-240	2012	Embase	Y	Less 18yr
How an ebstein-barr virus may induce acute fulminant myocarditis in a young immunocompetent adult: Case report	Horovitz A , El Zein I , Valentino R , Medhaoui H , Inamo J	West Indian Med J . 2012;61(6): -	2012	Embase; MEDLINE	Y	Less 50 patients
Outcome of extracorporeal membrane oxygenation as short term mechanical support following heart transplantation: A single centre experience	Hosmane S R , Venkateswaran R , Salaie J , Williams S , Yonan N	J Heart Lung Transplant . 2012;31(4):S234-S235	2012	Embase	Y	V-A ECMO
Extracorporeal Membrane Oxygenation for Critically Ill Patients With 2009 Influenza A (H1N1)-Related Acute Respiratory Distress Syndrome: Preliminary Experience From a Single Center	Hou X , Guo L , Zhan Q , Jia X , Mi Y , Li B , Sun B , Hao X , Li H	Artif Organs. 2012;36(9):780-786	2012	Embase; MEDLINE	Y	Duplicate
Venoarterial extracorporeal membrane oxygenation support for two patients after pulmonary thromboendarterectomy	Hou X , Xing J , Hao X , Li H , Gan H	Can J Anesth . 2012;59(6):622-623	2012	Embase; MEDLINE	Y	Less 50 patients
Pulmonary resection and ECMO: A salvage therapy for penetrating lung trauma	Incagnoli P , Blaise H , Mathey C , Vinclair M , Albaladejo P	Ann Fr Anesth Reanim . 2012;31(7/8/2015):641-643	2012	Embase; MEDLINE	Y	Duplicate
Extracorporeal membrane oxygenation as a bridge to lung transplantation and recovery	Javidfar J , Brodie D , Iribarne A , Jurado J , Lavelle M , Brenner K , Arcasoy S , Sonett J , Bacchetta M	J Thorac Cardiovasc Surg . 2012;144(3):716-721	2012	Embase; MEDLINE	Y	Duplicate
Venovenous extracorporeal membrane oxygenation using a single cannula in patients with pulmonary hypertension and atrial septal defects	Javidfar J , Brodie D , Sonett J , Bacchetta M	J Thorac Cardiovasc Surg . 2012;143(4):982-984	2012	Embase; MEDLINE	Y	Not available
Bilateral lobar lung transplantation using H1N1-positive lungs in the presence of anti-HLA antibodies	Kuppuswamy M , Popov A F , Carby M , Redmond K C , Zych B , Marczin N , Mohite P N , Krueger H , Simon A R	Am J Respir Crit Care Med . 2012;186(1):108-109	2012	Embase; MEDLINE	Y	Less 50 patients
Primary lung transplantation after bridge with extracorporeal membrane oxygenation: A plea for a shift in our paradigms for indications	Lang G , Taghavi S , Aigner C , Renyi-Vamos F , Jaksch P , Augustin V , Nagayama K , Ghanim B , Klepetko W	Transplantation. 2012;93(7):729-736	2012	Embase; MEDLINE	Y	V-A ECMO
Weaning from venovenous extracorporeal membrane oxygenation without anticoagulation: Is it possible?	Lappa A , Donfrancesco S , Contento C , Vitalini E , Pisani P , Menichetti A , Fiorani B , Musumeci F	Ann Thorac Surg . 2012;94(1):e1: e3-e1: e3	2012	Embase; MEDLINE	Y	Less 50 patients
Acute respiratory distress syndrome related to influenza A H1N1 infection: Correlation of pulmonary computed tomography findings to extracorporeal membrane oxygenation treatment and clinical outcome	Lazoura O , Parthipun A A , Roberton B J , Downey K , Finney S , Padley S	J Crit Care. 2012;27(6):602-608	2012	Embase; MEDLINE	Y	Duplicate
Impact of extracorporeal membrane oxygenation and continuous venovenous hemodiafiltration on the pharmacokinetics of oseltamivir carboxylate in critically ill patients with pandemic (H1N1) influenza	Lemaitre F , Luyt C -E, Roullet-Renoleau F , Nieszkowska A , Zahr N , Corvol E , Fernandez C , Antignac M , Farinotti R , Combes A	Ther Drug Monit . 2012;34(2):171-175	2012	Embase; MEDLINE	Y	Duplicate
The application of extracorporeal membrane oxygenation in critically ill patient	Li H -L, Meng C , Zhu X , Guo L -M, Li B -S	Chin Crit Care Med . 2012;24(2):86-89	2012	Embase; MEDLINE	Y	Duplicate
[The application of extracorporeal membrane oxygenation for severe acute respiratory failure in adults].	Li X Y , Zhan Q Y	Zhonghua Jie He He Hu Xi Za Zhi. 2012;35(11):802-803	2012	MEDLINE	Y	Duplicate
Long-term ECMO treatment in Jehovah's Witness patient without transfusions	Lindholm J , Palmer K , Frenckner B	Perfusion. 2012;27(4):332-334	2012	Embase; MEDLINE	Y	Less 50 patients
Prone and ECMO - A contradiction per se?	Litmathe J , Sucker C , Easo J , Wigger L , Dapunt O	Perfusion. 2012;27(1):78-82	2012	Embase; MEDLINE	Y	Duplicate
Acute chest syndrome of sickle cell disease	Livesay S , Ruppert S D	Crit Care Nurs Q . 2012;35(2):183-195	2012	Embase; MEDLINE	Y	Less 50 patients
Activated partial thromboplastin time is a better trending tool in pediatric extracorporeal membrane oxygenation	Maul T M , Wolff E L , Kuch B A , Rosendorff A , Morell V O , Wearden P D	Pediatr Crit Care Med . 2012;13(6):e363: e371-e363: e371	2012	Embase; MEDLINE	Y	Less 18yr
Challenges in patients supported with extracorporeal membrane oxygenation in Brazil	Mendes P V , Moura E , Barbosa E V S , Hirota A S , Scordamaglio P R , Ajjar F M , Costa E L V , Azevedo L C P , Park M	Clinics. 2012;67(12):1511-1515	2012	MEDLINE	Y	Less 50 patients
Mechanical circulatory support after heart transplantation	Mihaljevic T , Jarrett C M , Gonzalez-Stawinski G , Smedira N G , Nowicki E R , Thuita L , Mountis M , Blackstone E H	Eur J Cardio-thorac Surg . 2012;41(1):200-206	2012	Embase; MEDLINE	Y	V-A ECMO
Safe management of cesarean section in a patient of Eisenmenger syndrome	Minicucci S , Segala V , Verdecchia C , Sismondi P , Casabona R , Sansone F	Ann Card Anaesth . 2012;15(4):296-298	2012	Embase; MEDLINE	Y	Less 50 patients
Prolonged heparin-free extracorporeal membrane oxygenation in multiple injured acute respiratory distress syndrome patients with traumatic brain injury	Muellenbach R M , Kredel M , Kunze E , Kranke P , Kuestermann J , Brack A , Gorski A , Wunder C , Roewer N , Wurmb T	J Trauma Acute Care Surg . 2012;72(5):1444-1447	2012	Embase; MEDLINE	Y	Less 50 patients
Outcomes of the first 30 cases of an adult extracorporeal membrane oxygenation program: Strategies to manage the "learning curve" and implications for intensive care unit risk adjustment models	Mullany D V , Bull T N , Hunt W , Shekar K , Thomson B , Fraser J F , Ziegenfuss M	Crit Care Resusc . 2012;14(2):119-129	2012	MEDLINE	Y	Duplicate
Strategies for the withdrawal of extracorporeal membrane oxygenation for severe acute respiratory failure support: A new challenge?	Muller G , Guillon A , Garot D , Mercier E , Perrotin D	Anaesth Intensive Care. 2012;40(2):359-	2012	Embase; MEDLINE	Y	Duplicate
Left tilt position for easy extracorporeal membrane oxygenation cannula insertion in late pregnancy patients	Ngatchou W , Ramadan A S E , Van Nooten G , Antoine M	Interact Cardiovasc Thorac Surg . 2012;15(2):285-287	2012	Embase; MEDLINE	Y	Less 50 patients
Aortic-valve gonococcal endocarditis in a pediatric patient requiring root replacement & post-operative ECMO	Nocera E , Murthy S , Stern J , Tomek S , Daugherty L , Gensini F , Christie C , Hinkle A	Crit Care Med . 2012;40(12):313-314	2012	Embase	Y	Less 50 patients
Long-term mechanical circulatory support of an adult patient with down syndrome	Nunes A J , Buchholz H , Sinnadurai S , MacArthur R G	Ann Thorac Surg . 2012;93(4):1305-1307	2012	Embase; MEDLINE	Y	Less 50 patients
Edmonton experience with venovenous extracorporeal membrane oxygenation in critically ill adults with severe respiratory failure	Nunes A J , Hruczkowski J , MacArthur R G	Can J Cardiol . 2012;28(5):S399-	2012	Embase	Y	Less 18yr
Case report of anesthesia with Veno-Veno Extracorporeal Membrane Oxygenation (V-V ECMO) during one-lung ventilation for Acute Respiratory Distress syndrome (ARDS) complicated with severe sepsis due to spontaneous esophageal rupture	Ono Y , Ohta Y , Matsumoto G , Kim S , Yokota H , Sakamoto A	Jpn J Anesthesiol . 2012;61(10):1137-1140	2012	Embase; MEDLINE	Y	Less 50 patients
Prolonged use of extracorporeal membrane oxygenation combined with prone positioning in patients with acute respiratory distress syndrome and invasive Aspergillosis	Otterspoor L C , Smit F H , Van Laar T J , Kesecioglu J , Van Dijk D	Perfusion. 2012;27(4):335-337	2012	Embase; MEDLINE	Y	Less 50 patients
First-year experience of a Brazilian tertiary medical center in supporting severely ill patients using extracorporeal membrane oxygenation	Park M , Azevedo L C P , Mendes P V , Carvalho C R R , Amato M B P , Schettino G P P , Tucci M , Maciel A T , Taniguchi L U , Barbosa E V S , Nardi R O , Ignacio M N , Machtans C C , Neves W A , Hirota A S , Costa E L V	Clinics. 2012;67(10):1157-1163	2012	MEDLINE	Y	Duplicate
Intensive pulmonary support using extracorporeal membrane oxygenation for adult liver transplant recipients with respiratory failure	Park Y , Hwang S	Liver Transplant . 2012;18( ):S271-	2012	Embase	Y	Duplicate
Intensive pulmonary support using extracorporeal membrane oxygenation for adult liver transplant recipients with respiratory failure	Park Y , Hwang S , Lee S G	Am J Transplant . 2012;12( ):439-	2012	Embase	Y	Duplicate
Effect of pulmonary support using extracorporeal membrane oxygenation for adult liver transplant recipients with respiratory failure	Park Y -H, Hwang S , Park H -W, Park C -S, Lee H -J, Namgoong J -M, Yoon S -Y, Jung S -W, Song G -W, Park G -C, Jung D -H, Ahn C -S, Kim K -H, Moon D -B, Ha T -Y, Lee S -G	Transplant Proc . 2012;44(3):757-761	2012	Embase; MEDLINE	Y	Duplicate
Respiratory failure after lung transplantation: Extracorporeal membrane oxygenation as a rescue treatment	Pego-Fernandes P M , Hajjar L A , Galas F R B G , Samano M N , Ribeiro A K F , Park M , Soares R , Osawa E , Jatene F B	Clinics. 2012;67(12):1529-1532	2012	MEDLINE	Y	Less 50 patients
Clinical experience of extracorporeal membrane oxygenation for acute respiratory distress syndrome associated with pneumonia in children	Peng C -C, Wu S -J, Chen M -R, Chiu N -C, Chi H	J Formos Med Assoc . 2012;111(3):147-152	2012	Embase; MEDLINE	Y	Less 18yr
Mechanical circulatory support as a treatment option for end-stage heart failure at the university hospital center Zagreb	Petricevic M , Gasparovic H , Svetina L , Cikes M , Konosic S , Ivancan V , Burcar I , Colak Z , Milicic D , Biocina B	Neurol Croatica. 2012;61(SUPPL 2):81-86	2012	Embase	Y	V-A ECMO
Rescue therapy with a pumpless extracorporeal lung assist device in a patient with acute interstitial lung disease and severe refractory hypercapnia	Petzoldt M , Braune S , Bittmann I , Kluge S	Respir Care. 2012;57(2):293-297	2012	Embase; MEDLINE	Y	Less 50 patients
Bloodless extracorporeal membrane oxygenation in the jehovah's witness patient	Preston T J , Olshove Jr V F , Chase M	J Extra-Corpor Technol . 2012;44(1):39-42	2012	Embase; MEDLINE	Y	Less 50 patients
Double lumen bi-cava cannula for veno-venous extracorporeal membrane oxygenation as bridge to lung transplantation in non-intubated patient	Reeb J , Falcoz P -E, Santelmo N , Massard G	Interact Cardiovasc Thorac Surg . 2012;14(1):125-127	2012	Embase; MEDLINE	Y	Less 50 patients
Extracorporeal membrane oxygenation cannulation trends for pediatric respiratory failure and central nervous system injury	Rollins M D , Hubbard A , Zabrocki L , Barnhart D C , Bratton S L	J Pediatr Surg . 2012;47(1):68-75	2012	Embase; MEDLINE	Y	Less 18yr
Portable miniaturized extracorporeal membrane oxygenation systems for H1N1-related severe acute respiratory distress syndrome: A case series	Roncon-Albuquerque R , Basilio C , Figueiredo P , Silva S , Mergulhao P , Alves C , Veiga R , Castelo-Branco S , Paiva L , Santos L , Honrado T , Dias C , Oliveira T , Sarmento A , Mota A M , Paiva J A	J Crit Care. 2012;27(5):454-463	2012	Embase; MEDLINE	Y	Duplicate
Lung transplantation and posterior reversible encephalopathy syndrome: A case series	Rosso L , Nosotti M , Mendogni P , Palleschi A , Tosi D , Montoli M , Pappalettera M , Tarsia P , Santambrogio L	Transplant Proc . 2012;44(7):2022-2025	2012	Embase; MEDLINE	Y	No Complications Reported
Outcomes of percutaneous femoral cannulation for venoarterial extracorporeal membrane oxygenation support	Roussel A , Al-Attar N , Alkhoder S , Radu C , Raffoul R , Alshammari M , Montravers P , Wolff M , Nataf P	Eur Heart J Acute Cardiovasc Care. 2012;1(2):111-114	2012	Embase	Y	V-A ECMO
Use of neural trigger during neurally adjusted ventilatory assist in a patient with a large broncho-pleural fistula and air leakage	Roze H , Ouattara A	Intensive Care Med . 2012;38(5):922-923	2012	Embase; MEDLINE	Y	Less 50 patients
Extracorporeal membrane oxygenation for the treatment of severe postoperative cardiac or pulmonary failure: Vilnius heart surgery centre experience	Samalavicius R , Rucinskas K , Laurusonis K , Kalinauskas G	Heart Surg Forum. 2012;15(6):E352-E353	2012	Embase	Y	V-A ECMO
Mechanical circulatory support programme-a one centre experience	Samardzic J , Petricevic M , Biocina B , Skoric B , Gasparovic H , Cikes M , Lovric D , Ivancan V , Konosic S , Milicic D	Eur J Heart Fail Suppl . 2012;11( ):S152-	2012	Embase	Y	V-A ECMO
A case of fluminant myocarditis with fetal pulmonary edema even after introduction of Bi-ventricular assist devices	Sawada M , Hashiba E , Kudo T , Okawa H , Tsubo T , Ishihara H , Hirota K	Jpn J Anesthesiol . 2012;61(7):758-760	2012	Embase; MEDLINE	Y	Less 50 patients
Venovenous extracorporeal membrane oxygenation for acute lung failure in adults	Schmid C , Philipp A , Hilker M , Rupprecht L , Arlt M , Keyser A , Lubnow M , Mller T	J Heart Lung Transplant . 2012;31(1):9-15	2012	Embase; MEDLINE	Y	Duplicate
Growing experience with extracorporeal membrane oxygenation as a bridge to lung transplantation.	Shafii A E , Mason D P , Brown C R , Vakil N , Johnston D R , McCurry K R , Pettersson G B , Murthy S C	ASAIO J . 2012;58(5):526-529	2012	MEDLINE	Y	Duplicate
Sedation during extracorporeal membrane oxygenation - Why more is less	Shekar K , Roberts J A , Ghassabian S , Mullany D V , Ziegenfuss M , Smith M T , Fung Y L , Fraser J F	Anaesth Intensive Care. 2012;40(6):1067-1069	2012	Embase; MEDLINE	Y	Review / M-A
Increased sedation requirements in patients receiving extracorporeal membrane oxygenation for respiratory and cardiorespiratory failure	Shekar K , Roberts J A , Mullany D V , Corley A , Fisquet S , Bull T N , Barnett A G , Fraser J F	Anaesth Intensive Care. 2012;40(4):648-655	2012	Embase; MEDLINE	Y	Duplicate
ASAP ECMO: Antibiotic, Sedative and Analgesic Pharmacokinetics during Extracorporeal Membrane Oxygenation: A multi-centre study to optimise drug therapy during ECMO	Shekar K , Roberts J A , Welch S , Buscher H , Rudham S , Burrows F , Ghassabian S , Wallis S C , Levkovich B , Pellegrino V , McGuinness S , Parke R , Gilder E , Barnett A G , Walsham J , Mullany D V , Fung Y L , Smith M T , Fraser J F	BMC Anesthesiol . 2012;12( ): -	2012	Embase	Y	No clinical data
Continuation of Extracorporeal Membrane Oxygenation Support After Multiple Failed Lung Transplantations	Silverman R. B.	ICU Dir . 2012;3(2):91-96	2012	Embase	Y	Less 50 patients
Extracorporeal membrane oxygenation promotes survival in children with trauma related respiratory failure	Skarda D , Henricksen J W , Rollins M	Pediatr Surg Int . 2012;28(7):711-714	2012	Embase; MEDLINE	Y	Less 18yr
One hundred ten days of extracorporeal membrane oxygenation in a young woman with postpartum cerebral venous thrombosis and acute respiratory distress syndrome	Strecker T , Munch F , Weyand M	Heart Surg Forum. 2012;15(4):180: E181-180: E181	2012	Embase; MEDLINE	Y	Duplicate
[The experience of extracorporeal membrane oxygenation for severe acute respiratory failure in adults].	Sun B , Wang C T , Wu J , Li X Y , He H Y , Zhang C Y , Tong Z H , Zhan Q Y , Wang C	Zhonghua Jie He He Hu Xi Za Zhi. 2012;35(11):804-808	2012	MEDLINE	Y	Not english
Extracorporeal membrane oxygenation for 2009 influenza A(H1N1) severe respiratory failure in Japan	Takeda S , Kotani T , Nakagawa S , Ichiba S , Aokage T , Ochiai R , Taenaka N , Kawamae K , Nishimura M , Ujike Y , Tajimi K	J Anesth . 2012;26(5):650-657	2012	Embase; MEDLINE	Y	Duplicate
Respiratory support including emergent extracorporeal membrane oxygenation as a bridge to airway dilatation following perioperative bronchial occlusion	Thung A K , Hayes Jr D , Preston T J , Tobias J D	Middle East J Anesthiol . 2012;21(6):879-888	2012	MEDLINE	Y	Less 50 patients
Mechanically ventilated children with 2009 pandemic influenza A/H1N1: Results from the National Pediatric Intensive Care Registry in Japan	Tokuhira N , Shime N , Inoue M , Kawasaki T , Sakurai Y , Kurosaka N , Ueta I , Nakagawa S	Pediatr Crit Care Med . 2012;13(5):e294: e298-e294: e298	2012	Embase; MEDLINE	Y	Less 18yr
Early lung retransplantation in a patient affected by cystic fibrosis correlated with donor cause of death: A case report	Tosi D , Mendogni P , Rosso L , Palleschi A , Filippi N , Reda M , Santambrogio L , Nosotti M	Transplant Proc . 2012;44(7):2041-2042	2012	Embase; MEDLINE	Y	Less 50 patients
Rapidly progressive pulmonary venoocclusive disease in young women taking oral contraceptives	Urisman A , Leard L E , Nathan M , Elicker B M , Hoopes C , Kukreja J , Jones K D	J Heart Lung Transplant . 2012;31(9):1031-1036	2012	Embase; MEDLINE	Y	Less 50 patients
Lack of effect of extracorporeal membrane oxygenation on tigecycline pharmacokinetics	Veinstein A , Debouverie O , Gregoire N , Goudet V , Adier C , Robert R , Couet W	J Antimicrob Chemother . 2012;67(4):1047-1048	2012	Embase; MEDLINE	Y	Less 50 patients
Acute Budd-Chiari syndrome during veno-venous extracorporeal membrane oxygenation diagnosed using transthoracic echocardiography	Victor K , Barrett N , Glover G , Kapetanakis S , Langrish C	Br J Anaesth . 2012;108(6):1043-1044	2012	Embase; MEDLINE	Y	Less 50 patients
The successful use of cardiopulmonary support for a transected bronchus	Walker J L , Wiersch J , Benson C , Young H A , Dearmond D T , Johnson S B	Perfusion. 2012;27(1):34-38	2012	Embase; MEDLINE	Y	Less 50 patients
Management of a patient with severe sepsis	Warren M L , Ruppert S D	Crit Care Nurs Q . 2012;35(2):134-143	2012	Embase; MEDLINE	Y	Less 50 patients
Emergency extracorporeal membrane oxygenation to treat massive aspiration during anaesthesia induction. A case report	Wetsch W A , Spohr F A , Hinkelbein J , Padosch S A	Acta Anaesthesiol Scand . 2012;56(6):797-800	2012	Embase; MEDLINE	Y	Less 50 patients
Extracorporeal membrane oxygenation in a nonintubated patient with acute respiratory distress syndrome	Wiesner O , Hadem J , Sommer W , Kuhn C , Welte T , Hoeper M M	Eur Respir J . 2012;40(5):1296-1298	2012	Embase; MEDLINE	Y	Less 50 patients
Successful emergent lung transplantation after remote ex vivo perfusion optimization and transportation of donor lungs	Wigfield C H , Cypel M , Yeung J , Waddell T , Alex C , Johnson C , Keshavjee S , Love R B	Am J Transplant . 2012;12(10):2838-2844	2012	Embase; MEDLINE	Y	Less 50 patients
Successful weaning from extracorporal circulation using a pumpless extracorporal lung assist device in a patient with intraoperative hypercapnic lung failure during aortic valve replacement	Wilbring M , MPetzoldt , Gulbins H , Goetz A E , Reichenspurner H	Thorac Cardiovasc Surg . 2012;60(4):299-301	2012	Embase; MEDLINE	Y	Less 50 patients
End-organ recovery and survival with the quadroxd oxygenator in adults on ECMO	Wong J K , Pitcher H , Hirose H , De Caro M , Cavarocchi N C	Artif Organs. 2012;36(5):A40-A41	2012	Embase	Y	V-A ECMO
[Extracorporeal membrane oxygenation for acute respiratory distress syndrome: a study of 11 cases].	Yan J , Zhou M , Zhu Y H , Xu H Y , Yang T , Chen J Y	Zhonghua Jie He He Hu Xi Za Zhi. 2012;35(11):809-813	2012	MEDLINE	Y	Not english
Survival of septic adults compared with nonseptic adults receiving extracorporeal membrane oxygenation for cardiopulmonary failure: a propensity-matched analysis.	Cheng A, Sun HY, Lee CW, Ko WJ, Tsai PR, Chuang YC, Hu FC, Chang SC, Chen YC.	J Crit Care. 2013 Aug;28(4):532.e1-10. doi: 10.1016/j.jcrc.2012.11.021. Epub 2013 Mar 19.	2013	pubmed	Y	Unable to find data
Extracorporeal membrane oxygenation in adult patients with severe acute respiratory failure.	Lindskov C, Jensen RH, Sprogoe P, Klaaborg KE, Kirkegaard H, Severinsen IK, Lorentsen AG, Folkersen L, Ilkjaer S, Pedersen CM.	Acta Anaesthesiol Scand. 2013 Mar;57(3):303-11. doi: 10.1111/aas.12050. Epub 2012 Dec 28.	2013	pubmed	Y	V-A ECMO
Predicting mortality risk in patients undergoing venovenous ECMO for ARDS due to influenza A (H1N1) pneumonia: the ECMOnet score.	Pappalardo F, Pieri M, Greco T, Patroniti N, Pesenti A, Arcadipane A, Ranieri VM, Gattinoni L, Landoni G, Holzgraefe B, Beutel G, Zangrillo A; Italian ECMOnet.	Intensive Care Med. 2013 Feb;39(2):275-81. doi: 10.1007/s00134-012-2747-1. Epub 2012 Nov 16.	2013	pubmed	Y	ELSO db
AvalonÂ© bicaval dual-lumen cannula for venovenous extracorporeal membrane oxygenation: survey of cannula use in France.	Chimot L, MarquÃ© S, Gros A, Gacouin A, LavouÃ© S, Camus C, Le Tulzo Y.	ASAIO J. 2013 Mar-Apr;59(2):157-61. doi: 10.1097/MAT.0b013e31827db6f3.	2013	pubmed	Y	Risk of Bias
Extracorporeal lung support in trauma patients with severe chest injury and acute lung failure: A 10-year institutional experience	Ried M , Bein T , Philipp A , Muller T , Graf B , Schmid C , Zonies D , Diez C , Hofmann H -S	Crit Care. 2013;17(3): -	2013	Embase	Y	Less 50 patients
Extracorporeal lung support in trauma patients with severe chest injury and acute lung failure: A 10-year institutional experience	Ried M , Bein T , Philipp A , Muller T , Graf B , Schmid C , Zonies D , Diez C , Hofmann H -S	Crit Care. 2013;17(3): -	2013	Embase	Y	Less 50 patients
A novel extracorporeal CO(2) removal system: results of a pilot study of hypercapnic respiratory failure in patients with COPD.	Burki NK, Mani RK, Herth FJ, Schmidt W, Teschler H, Bonin F, Becker H, Randerath WJ, Stieglitz S, Hagmeyer L, Priegnitz C, Pfeifer M, Blaas SH, Putensen C, Theuerkauf N, Quintel M, Moerer O.	Chest. 2013 Mar;143(3):678-86. doi: 10.1378/chest.12-0228.	2013	pubmed	Y	Less 50 patients
Extracorporeal membrane oxygenation and severe acute respiratory distress secondary to Legionella: 10 year experience.	Noah MA, Ramachandra G, Hickey MM, Jenkins DR, Harvey CJ, Westrope CA, Firmin RK, Peek GJ.	ASAIO J. 2013 May-Jun;59(3):328-30. doi: 10.1097/MAT.0b013e31829119c6.	2013	pubmed	Y	Less 50 patients
Use of venovenous extracorporeal membrane oxygenation in central airway obstruction to facilitate interventions leading to definitive airway security.	Hong Y, Jo KW, Lyu J, Huh JW, Hong SB, Jung SH, Kim JH, Choi CM.	J Crit Care. 2013 Oct;28(5):669-74. doi: 10.1016/j.jcrc.2013.05.020. Epub 2013 Jul 8.	2013	pubmed	Y	Less 50 patients
A new formula for determining arterial oxygen saturation during venovenous extracorporeal oxygenation	Messai E , Bouguerra A , Harmelin G , Di Lascio G , Cianchi G , Bonacchi M	Intensive Care Med . 2013;39(2):327-334	2013	Embase; MEDLINE	Y	Less 50 patients
Extracorporeal membrane oxygenation as a bridge to pulmonary transplantation	Hoopes C W , Kukreja J , Golden J , Davenport D L , Diaz-Guzman E , Zwischenberger J B	J Thorac Cardiovasc Surg . 2013;145(3):862-868	2013	Embase; MEDLINE	Y	Less 50 patients
Extracorporeal membrane oxygenation as bridge to lung transplantation	Anile M , Diso D , Russo E , Patella M , Carillo C , Pecoraro Y , Onorati I , Pugliese F , Ruberto F , De Giacomo T , Angioletti D , Mantovani S , Mazzesi G , Frati G , Rendina E A , Venuta F	Transplant Proc . 2013;45(7):2621-2623	2013	Embase; MEDLINE	Y	Less 50 patients
Extracorporeal life support in patients with multiple injuries and severe respiratory failure: a single-center experience?	Biderman P, Einav S, Fainblut M, Stein M, Singer P, Medalion B.	J Trauma Acute Care Surg. 2013 Nov;75(5):907-12. doi: 10.1097/TA.0b013e3182a8334f.	2013	pubmed	Y	Less 50 patients
Venovenous extracorporeal membrane oxygenation is effective against post-cardiotomy acute respiratory failure in adults.	Nakamura H, Yamaguchi H, Amano A, Nakao T.	Gen Thorac Cardiovasc Surg. 2013 Jul;61(7):402-8. doi: 10.1007/s11748-013-0226-4. Epub 2013 Feb 24.	2013	pubmed	Y	Less 50 patients
Active rehabilitation during extracorporeal membrane oxygenation as a bridge to lung transplantation.	Rehder KJ1, Turner DA, Hartwig MG, Williford WL, Bonadonna D, Walczak RJ Jr, Davis RD, Zaas D, Cheifetz IM.	Respir Care. 2013 Aug;58(8):1291-8.	2013	Referenced	Y	Less 50 patients
Extracorporeal membrane oxygenation instead of invasive mechanical ventilation in patients with acute respiratory distress syndrome.	Hoeper MM, Wiesner O, Hadem J, Wahl O, Suhling H, Duesberg C, Sommer W, Warnecke G, Greer M, Boenisch O, Busch M, Kielstein JT, Schneider A, Haverich A, Welte T, KÃ¼hn C.	Intensive Care Med. 2013 Nov;39(11):2056-7. doi: 10.1007/s00134-013-3052-3. Epub 2013 Aug 7. No abstract available.	2013	pubmed	Y	Less 50 patients
First experience with the deltastream(R) DP3 in venovenous extracorporeal membrane oxygenation and air-supported inter-hospital transport.	Lunz D, Philipp A, Judemann K, Amann M, Foltan M, Schmid C, Graf B, Zausig YA.	Interact Cardiovasc Thorac Surg. 2013 Nov;17(5):773-7. doi: 10.1093/icvts/ivt320. Epub 2013 Jul 19.	2013	pubmed	Y	Less 50 patients
Successful management of bleeding complications in patients supported with extracorporeal membrane oxygenation with primary respiratory failure.	Lamb KM, Cowan SW, Evans N, Pitcher H, Moritz T, Lazar M, Hirose H, Cavarocchi NC.	Perfusion. 2013 Mar;28(2):125-31. doi: 10.1177/0267659112464096. Epub 2012 Oct 26.	2013	pubmed	y	Less 50 patients
Avoiding ECMO in a patient with pump" lung post-cardiopulmonary bypass."	Trinh MA, Bhatt HV, Weiner MM.	Middle East J Anesthesiol. 2013 Oct;22(3):327-8.	2013	pubmed	Y	Less 50 patients
[The incidence and mortality of ARDS at LandspÃ­tali - The National University Hospital of Iceland 2004-2008].	Gunnarsson TS, Sigvaldason K, Reynisson KI, MÃ¶ller AD.	Laeknabladid. 2013 Oct;99(10):443-8. Icelandic.	2013	pubmed	Y	Not english
Adult non-cardiac ECMO for the treatment of ARDS--the Mississippi experience.	Frei LW.	J Miss State Med Assoc. 2013 Jul;54(7):185-7.	2013	pubmed	Y	Less 50 patients
Extracorporeal lung support in H1N1 provoked acute respiratory failure: the experience of the German ARDS Network.	Weber-Carstens S, Goldmann A, Quintel M, Kalenka A, Kluge S, Peters J, Putensen C, MÃ¼ller T, Rosseau S, ZwiÃŸler B, Moerer O.	Dtsch Arztebl Int. 2013 Aug;110(33-34):543-9. doi: 10.3238/arztebl.2013.0543. Epub 2013 Aug 19.	2013	pubmed	Y	No Complications Reported
Successful application of extracorporeal membrane oxygenation due to pulmonary hemorrhage secondary to granulomatosis with polyangiitis.	Hohenforst-Schmidt W, Petermann A, Visouli A, Zarogoulidis P, Darwiche K, Kougioumtzi I, Tsakiridis K, Machairiotis N, Ketteler M, Zarogoulidis K, Brachmann J.	Drug Des Devel Ther. 2013 Jul 24;7:627-33. doi: 10.2147/DDDT.S47156. Print 2013.	2013	pubmed	Y	Less 50 patients
[Acute respiratory distress syndrome and septic cardiomyopathy : successful application of veno-venoarterial extracorporeal membrane oxygenation].	KÃ¼stermann J, Gehrmann A, Kredel M, Wurmb T, Roewer N, Muellenbach RM.	Anaesthesist. 2013 Aug;62(8):639-43. doi: 10.1007/s00101-013-2213-7. Epub 2013 Aug 7. German.	2013	pubmed	Y	Less 50 patients
[A case of severe Legionella pneumonia in which survival was achieved without sequelae with the use of extracorporeal membrane oxygenation (ECMO)].	Kato H, Murata K, Kashiyama T, Okamoto S, Mikura S, Takamori M.	Kansenshogaku Zasshi. 2013 May;87(3):375-9. Japanese.	2013	pubmed	Y	Less 50 patients
Extracorporeal membrane oxygenation for adult respiratory failure.	Turner DA, Cheifetz IM.	Respir Care. 2013 Jun;58(6):1038-52. doi: 10.4187/respcare.02255. Review.	2013	pubmed	Y	Review / M-A
Extracorporeal membrane oxygenation: beneficial strategy for lung transplant recipients.	Cottini SR, Wenger U, Sailer S, Stehberger PA, Schuepbach RA, Hasenclever P, Wilhelm M, BÃ©chir M.	J Extra Corpor Technol. 2013 Mar;45(1):16-20.	2013	pubmed	Y	Not available
Perioperative management of bridge-to-lung transplant using ECMO.	Blum JM, Woodcock BJ, Dubovoy AV, Dubovoy T, Masood M, Chang AC, Lin J, Haft JW.	ASAIO J. 2013 May-Jun;59(3):331-5. doi: 10.1097/MAT.0b013e318288a0e5.	2013	pubmed	Y	V-A ECMO
Extracorporeal Life Support Organization Registry Report 2012.	Paden ML, Conrad SA, Rycus PT, Thiagarajan RR; ELSO Registry.	ASAIO J. 2013 May-Jun;59(3):202-10. doi: 10.1097/MAT.0b013e3182904a52.	2013	pubmed	Y	Duplicate
Adult refractory hypoxemic acute respiratory distress syndrome treated with extracorporeal membrane oxygenation: the role of a regional referral center.	Michaels AJ, Hill JG, Long WB, Young BP, Sperley BP, Shanks TR, Morgan LJ.	Am J Surg. 2013 May;205(5):492-8; discussion 498-9. doi: 10.1016/j.amjsurg.2013.01.025.	2013	pubmed	Y	V-A ECMO
[Quality of results of therapy of acute respiratory failure : changes over a period of two decades].	Briegel I, Dolch M, Irlbeck M, Hauer D, Kaufmann I, Schelling G.	Anaesthesist. 2013 Apr;62(4):261-70. doi: 10.1007/s00101-013-2156-z. Epub 2013 Apr 6. German.	2013	pubmed	Y	Not english
Acute respiratory distress syndrome with refractory hypoxaemia and severe septic shock caused by melioidosis: successful treatment with veno-venous extracorporeal membrane oxygenation.	van der Geest PJ, van der Jagt M, van Thiel R, van Bommel J.	Anaesth Intensive Care. 2013 Mar;41(2):262-3. No abstract available.	2013	pubmed	Y	Less 50 patients
Impact of extracorporeal membrane oxygenation support on clinical outcome of pediatric patients with acute cardiopulmonary failure: a single-center experience.	Lin YJ, Chung SY, Liang CD, Kuo HC, Huang CF, Chien SJ, Lin IC, Leu S, Sun CK, Ko SF, Sheu JJ, Yip HK.	Biomed J. 2013 Jan-Feb;36(1):28-34. doi: 10.4103/2319-4170.107161.	2013	pubmed	Y	Less 18yr
[Interhospital transport with extracorporeal life support: results and perspectives after 5 years experience].	Desebbe O, Rosamel P, Henaine R, Vergnat M, Farhat F, Dubien PY, Bastien O.	Ann Fr Anesth Reanim. 2013 Apr;32(4):225-30. doi: 10.1016/j.annfar.2013.02.006. Epub 2013 Mar 15. French.	2013	pubmed	Y	Not english
Smoking wet": respiratory failure related to smoking tainted marijuana cigarettes."	Gilbert CR, Baram M, Cavarocchi NC.	Tex Heart Inst J. 2013;40(1):64-7.	2013	pubmed	Y	Less 50 patients
Clinical utility of fetal magnetic resonance imaging in tetralogy of Fallot with absent pulmonary valve.	Chelliah A, Berger JT, Blask A, Donofrio MT.	Circulation. 2013 Feb 12;127(6):757-9. doi: 10.1161/CIRCULATIONAHA.112.139758. No abstract available.	2013	pubmed	Y	Less 18yr
Extracorporeal membrane oxygenation for interhospital transfer of a patient with severe ARDS.	Schaer C, Klarer A, Starck C, Yuen B.	Am J Emerg Med. 2013 Mar;31(3):640.e1-2. doi: 10.1016/j.ajem.2012.10.033. Epub 2013 Feb 4. No abstract available.	2013	pubmed	Y	Less 50 patients
Airway obstruction following bronchoscopic photodynamic therapy in early centrally located lung cancer requiring extracorporeal membrane oxygenation.	Chang YC, Lee JM, Ko WJ, Lee YC.	J Formos Med Assoc. 2013 Jan;112(1):54-6. doi: 10.1016/j.jfma.2012.07.013. Epub 2012 Sep 8.	2013	pubmed	Y	Less 50 patients
Extracorporeal membrane oxygenation to support whole-lung lavage in pulmonary alveolar proteinosis: salvage of the drowned lungs.	Hasan N, Bagga S, Monteagudo J, Hirose H, Cavarocchi NC, Hehn BT, Kavuru MS.	J Bronchology Interv Pulmonol. 2013 Jan;20(1):41-4. doi: 10.1097/LBR.0b013e31827ccdb5.	2013	pubmed	Y	Less 50 patients
Use of extracorporeal membrane oxygenation in combination with high-frequency oscillatory ventilation in post-traumatic ARDS.	Gothner M, Buchwald D, Schlebes A, Strauch JT, Schildhauer TA, Swol J.	Acta Anaesthesiol Scand. 2013 Mar;57(3):391-4. doi: 10.1111/aas.12065. Epub 2013 Jan 8.	2013	pubmed	Y	Less 50 patients
Blood oxygenation and decarboxylation determinants during venovenous ECMO for respiratory failure in adults.	Schmidt M, Tachon G, Devilliers C, Muller G, Hekimian G, BrÃ©chot N, Merceron S, Luyt CE, Trouillet JL, Chastre J, Leprince P, Combes A.	Intensive Care Med. 2013 May;39(5):838-46. doi: 10.1007/s00134-012-2785-8. Epub 2013 Jan 5.	2013	pubmed	Y	No Complications Reported
Extracorporeal membrane oxygenation as treatment for acute respiratory failure and subsequent pneumothorax caused by Pneumocystis jirovecii pneumonia in a kidney transplant recipient.	Wu YS, Lin NC, Chen IM, Chang SC, Wang FD, Huang YC, Wu TH, Loong CC.	Transpl Infect Dis. 2013 Feb;15(1):E5-8. doi: 10.1111/tid.12039. Epub 2012 Dec 20.	2013	pubmed	Y	Less 50 patients
Extracorporeal membrane oxygenation in adults with acute respiratory distress syndrome.	Hirshberg E, Miller RR 3rd, Morris AH.	Curr Opin Crit Care. 2013 Feb;19(1):38-43. doi: 10.1097/MCC.0b013e32835c2ac8. Review.	2013	pubmed	Y	Review / M-A
Patient-ventilator interaction in ARDS patients with extremely low compliance undergoing ECMO: a novel approach based on diaphragm electrical activity.	Mauri T, Bellani G, Grasselli G, Confalonieri A, Rona R, Patroniti N, Pesenti A.	Intensive Care Med. 2013 Feb;39(2):282-91. doi: 10.1007/s00134-012-2755-1. Epub 2012 Nov 30.	2013	pubmed	Y	No Complications Reported
Extracorporeal membrane oxygenation for pandemic influenza A(H1N1)-induced acute respiratory distress syndrome: a cohort study and propensity-matched analysis.	Pham T, Combes A, RozÃ© H, Chevret S, Mercat A, Roch A, Mourvillier B, Ara-Somohano C, Bastien O, Zogheib E, Clavel M, Constan A, Marie Richard JC, Brun-Buisson C, Brochard L; REVA Research Network.	Am J Respir Crit Care Med. 2013 Feb 1;187(3):276-85. doi: 10.1164/rccm.201205-0815OC. Epub 2012 Nov 15.	2013	pubmed	Y	V-A ECMO
Physical rehabilitation of patients in the intensive care unit requiring extracorporeal membrane oxygenation: a small case series.	Rahimi RA, Skrzat J, Reddy DR, Zanni JM, Fan E, Stephens RS, Needham DM.	Phys Ther. 2013 Feb;93(2):248-55. doi: 10.2522/ptj.20120336. Epub 2012 Oct 25.	2013	pubmed	Y	Less 50 patients
[Acute lung edema following surgery of a parapharyngeal abscess].	BermÃ¼ller C, Sommer F, Rudolph M, Schulz M.	Laryngorhinootologie. 2013 Jan;92(1):41-3. doi: 10.1055/s-0032-1327638. Epub 2012 Oct 8. German. No abstract available.	2013	pubmed	Y	Not english
Early enteral nutrition in adults receiving venoarterial extracorporeal membrane oxygenation: an observational case series.	Umezawa Makikado LD, FlordelÃ­s Lasierra JL, PÃ©rez-Vela JL, Colino GÃ³mez L, Torres SÃ¡nchez E, Maroto RodrÃ­guez B, Arribas LÃ³pez P, Montejo GonzÃ¡lez JC.	JPEN J Parenter Enteral Nutr. 2013 Mar;37(2):281-4. doi: 10.1177/0148607112451464. Epub 2012 Jul 2.	2013	pubmed	Y	V-A ECMO
Predicting mortality while on veno-venous extracorporeal membrane oxygenation.	Reis Miranda D, van Thiel R, Gommers D.	Intensive Care Med. 2013 Sep;39(9):1669.	2013	pubmed	Y	No Complications Reported
Discussion: Extracorporeal membrane oxygenation for adult respiratory failure	Turner DA1, Cheifetz IM.	Respir Care. 2013;58(6):1049-1052	2013	Embase	Y	Duplicate
Venovenous extracorporeal membrane oxygenation for the treatment of acute pulmonary embolism after ventral hernia repair	Aitchison S , Hoopes C W , Roth J S	Am Surg . 2013;79(4):446-448	2013	Embase	Y	Less 50 patients
Extracorporeal membrane oxygenation for refractory acute respiratory distress syndrome in severe malaria	Alves C , Chen J -T, Patel N , Abrams D , Figueiredo P , Santos L , Sarmento A , Paiva J A , Bacchetta M , Wilgus M -L, Roncon-Albuquerque R , Brodie D	Malaria J . 2013;12(1): -	2013	Embase	Y	Less 50 patients
Blastomycosis in children: A study of 14 cases	Anderson E J , Ahn P B , Yogev R , Jaggi P , Shippee D B , Shulman S T	J Pediatric Infect Dis Soc . 2013;2(4):386-390	2013	Embase	Y	Less 18yr
Catastrophic respiratory failure from tuberculosis pneumonia: Survival after prolonged extracorporeal membrane oxygenation support	Andresen M , Tapia P , Mercado M , Bugedo G , Bravo S , Regueira T	Respir Med Case Rep . 2013;10( ):19-22	2013	Embase	Y	Less 50 patients
Lower tidal volume strategy ((almost equal to)3 ml/kg) combined with extracorporeal CO2 removal versus 'conventional' protective ventilation (6 ml/kg) in severe ARDS: The prospective randomized Xtravent-study	Bein T , Weber-Carstens S , Goldmann A , Muller T , Staudinger T , Brederlau J , Muellenbach R , Dembinski R , Graf B M , Wewalka M , Philipp A , Wernecke K -D, Lubnow M , Slutsky A S	Intensive Care Med . 2013;39(5):847-856	2013	Embase; MEDLINE	Y	Duplicate
Magnitude of arterial carbon dioxide change at initiation of extracorporeal membrane oxygenation support is associated with survival	Bembea M M , Lee R , Masten D , Kibler K K , Lehmann C U , Brady K M , Easley R B	J Extra-Corpor Technol . 2013;45(1):26-32	2013	Embase; MEDLINE	Y	Less 18yr
Contemporary outcomes of lung transplantation using extracorporeal membrane oxygenation as bridge	Bermudez C A , Norihisa S , Diana Z , Annette D D , Jay B , Maria C , Joseph P , Cynthia G , Sappington P , Jonathan D	J Heart Lung Transplant . 2013;32(4):S266-	2013	Embase	Y	V-A ECMO
Extracorporeal life support in patients with multiple injuries and severe respiratory failure: A single-center experience?	Biderman P , Einav S , Fainblut M , Stein M , Singer P , Medalion B	J Trauma Acute Care Surg . 2013;75(5):907-912	2013	Embase; MEDLINE	Y	Duplicate
Treatment of acute respiratory distress with ECMO Experience of the Pneumology Department of Trieste	Biolo M , Santagiuliana M , Pagnin A , Torregiani C , Cifaldi R , Longo C , Gabrielli M , Pappalardo A , Confalonieri M	Rass Patol Appar Respir . 2013;28(6):330-336	2013	Embase	Y	Not english
Atypical clinic presentation of pandemic influenza A successfully rescued by extracorporeal membrane oxygenation-our experience and review of the literature	Bonacchi M , Ciapetti M , Lascio G , Harmelin G , Sani G , Peris A	Intervent Med Appl Sci . 2013;5(4):186-192	2013	Embase	Y	Less 50 patients
Acute lung injury after mechanical circulatory support implantation in patients on extracorporeal life support: An unrecognized problem	Boulate D , Luyt C -E, Pozzi M , Niculescu M , Combes A , Leprince P , Kirsch M	Eur J Cardio-thorac Surg . 2013;44(3):544-550	2013	Embase; MEDLINE	Y	V-A ECMO
Safety of percutaneous dilatational tracheostomy in patients on extracorporeal lung support	Braune S , Kienast S , Hadem J , Wiesner O , Wichmann D , Nierhaus A , Simon M , Welte T , Kluge S	Intensive Care Med . 2013;39(10):1792-1799	2013	Embase; MEDLINE	Y	No Complications Reported
A case series of the successful use of ECMO, continuous renal replacement therapy, and plasma exchange for thrombocytopenia-associated multiple organ failure	Bridges B C , Hardison D , Pietsch J	J Pediatr Surg . 2013;48(5):1114-1117	2013	Embase; MEDLINE	Y	Less 18yr
Quality of results of therapy of acute respiratory failure: Changes over a period of two decades	Briegel I , Dolch M , Irlbeck M , Hauer D , Kaufmann I , Schelling G	Anaesthesist. 2013;62(4):261-270	2013	Embase; MEDLINE	Y	Not english
Electronic iNO alerts for adult ECMO	Cannon J , Batchinsky A , Luellen D , Serio-Melvin M , Cancio L , Pamplin J , Chung K , Salinas J	Crit Care Med . 2013;41(12):A305-	2013	Embase	Y	No Complications Reported
Successful use of venovenous extracorporeal membrane oxygenation (VV ECMO) for patients with morbid obesity	Carlese A , Bello R , Jakobleff W , Lightbody J , Leung S	Chest. 2013;144(4): -	2013	Embase	Y	Less 18yr
Buying time: The use of extracorporeal membrane oxygenation as a bridge to lung transplantation in pediatric patients	Casswell G K , Pilcher D V , Martin R S , Pellegrino V A , Marasco S F , Robertson C , Butt W , Buckland M , Gooi J , Snell G I , Westall G P	Pediatr Transplant . 2013;17(8):E182: E188-E182: E188	2013	Embase; MEDLINE	Y	Less 18yr
[Severe and uncommon complications of anticholinesterase intoxication in children].	Cavari Y , Lifshitz M , Leibson T , Shorer Z , Rubinstein M , Sofer S	Harefuah. 2013;152(7):391: 394, 434-391: 394, 434	2013	MEDLINE	Y	Less 18yr
A promising use of ECMO in refractory hypoxemia in HIV/AIDS with PJP pneumonia and Iris	Cawcutt K , Lee S , De Moraes A G , Park J , Schears G , Nemergut M	Crit Care Med . 2013;41(12):A345-	2013	Embase	Y	Less 50 patients
Use of extracorporeal membrane oxygenation support during an emergent decompression of a thoracic epidural abscess	Chauhan A , Moraca R J , Altman D T	Spine. 2013;38(16):E1048: E1050-E1048: E1050	2013	Embase; MEDLINE	Y	Less 50 patients
Clinical utility of fetal magnetic resonance imaging in tetralogy of fallot with absent pulmonary valve	Chelliah A , Berger J T , Blask A , Donofrio M T	Circulation. 2013;127(6):757-759	2013	Embase; MEDLINE	Y	No clinical data
Survival of septic adults compared with nonseptic adults receiving extracorporeal membrane oxygenation for cardiopulmonary failure: A propensity-matched analysis	Cheng A , Sun H -Y, Lee C -W, Ko W -J, Tsai P -R, Chuang Y -C, Hu F -C, Chang S -C, Chen Y -C	J Crit Care. 2013;28(4):532.e1: 532.e10-532.e1: 532.e10	2013	Embase; MEDLINE	Y	V-A ECMO
Avalon(copyright) bicaval dual-lumen cannula for venovenous extracorporeal membrane oxygenation: Survey of cannula use in france	Chimot L , Marque S , Gros A , Gacouin A , Lavoue S , Camus C , Le Tulzo Y	ASAIO J . 2013;59(2):157-161	2013	Embase; MEDLINE	Y	Duplicate
Mortality in pediatric ECMO: An analysis of the pediatric health system information database	Coleman R , Moffett B , Loftis L , Shekerdemian L	Crit Care Med . 2013;41(12):A8-	2013	Embase	Y	Less 18yr
Life-threatening ventricular arrhythmias during ajmaline challenge in patients with Brugada syndrome: Incidence, clinical features, and prognosis	Conte G , Sieira J , Sarkozy A , De Asmundis C , Di Giovanni G , Chierchia G -B, Ciconte G , Levinstein M , Casado-Arroyo R , Baltogiannis G , Saenen J , Saitoh Y , Pappaert G , Brugada P	Heart Rhythm. 2013;10(12):1869-1874	2013	Embase; MEDLINE	Y	V-A ECMO
Extracorporeal membrane oxygenation: Beneficial strategy for lung transplant recipients	Cottini S R , Wenger U , Sailer S , Stehberger P A , Schuepbach R A , Hasenclever P , Wilhelm M , Bechir M	J Extra-Corpor Technol . 2013;45(1):16-20	2013	Embase; MEDLINE	Y	Duplicate
Organ allocation waiting time during extracorporeal bridge to lung transplant affects outcomes	Crotti S , Iotti G A , Lissoni A , Belliato M , Zanierato M , Chierichetti M , Di Meo G , Meloni F , Pappalettera M , Nosotti M , Santambrogio L , Vigano M , Braschi A , Gattinoni L	Chest. 2013;144(3):1018-1025	2013	Embase; MEDLINE	Y	Not available
Endoscopic guide wire gallbladder decompression in a critically ill, septic patient	Curcio G , Azzopardi N , Granata A , Barresi L , Tarantino I , Traina M	Endoscopy. 2013;45(SUPPL2):E248: E249-E248: E249	2013	Embase; MEDLINE	Y	No clinical data
New insights in the management of toxic acute lung injury	De Lange D.	Toxicol Lett . 2013;221( ):S23-	2013	Embase	Y	Review / M-A
High rate of respiratory MDR gram-negative bacteria in H1N1-ARDS treated with ECMO	De Rosa F G , Corcione S , Pagani N , Stella M L , Urbino R , Di Perri G , Ranieri V M	Intensive Care Med . 2013;39(10):1880-1881	2013	Embase; MEDLINE	Y	Not available
Histopathologic features of explanted lungs supported by veno-venous extracorporeal membrane oxygenation	Evans C F , Kon Z N , Wehman B P , Gibber M , Iacono A T , Burke A , Griffith B P	J Heart Lung Transplant . 2013;32(4):S244-	2013	Embase	Y	No Complications Reported
Myocardial dysfunction during H1N1 influenza infection	Fagnoul D , Pasquier P , Bodson L , Ortiz J A , Vincent J -L, De Backer D	J Crit Care. 2013;28(4):321-327	2013	Embase; MEDLINE	Y	V-A ECMO
Initial experience with single-vessel cannulation for venovenous extracorporeal membrane oxygenation in pediatric respiratory failure	Fallon S C , Shekerdemian L S , Olutoye O O , Cass D L , Zamora I J , Nguyen T , Kim E S , Larimer E L , Lee T C	Pediatr Crit Care Med . 2013;14(4):366-373	2013	Embase; MEDLINE	Y	Less 18yr
Transcatheter aortic valve implantation in a very young patient	Faria R , Caeiro D , De Carvalho R F , Lima F , Mota J C , Rodrigues A , Braga P , Gama V	Rev Port Cardiol . 2013;32(10):827-831	2013	Embase; MEDLINE	Y	Less 50 patients
Nutrition support during extracorporeal membrane oxygenation (ECMO) in adults: A retrospective audit of 86 patients	Ferrie S , Herkes R , Forrest P	Intensive Care Med . 2013;39(11):1989-1994	2013	Embase; MEDLINE	Y	V-A ECMO
Human herpes virus co-infection is associated with mortality in HIV-negative patients with Pneumocystis jirovecii pneumonia	Fillatre P , Chevrier S , Revest M , Gacouin A , Jouneau S , Leroy H , Robert-Gangneux F , Minjolle S , Le Tulzo Y , Tattevin P	Eur J Clin Microbiol Infect Dis . 2013;32(2):189-194	2013	Embase; MEDLINE	Y	No Complications Reported
Adult non-cardiac ECMO for the treatment of ARDS--the Mississippi experience.	Frei L. W.	J Miss State Med Assoc . 2013;54(7):185-187	2013	MEDLINE	Y	Duplicate
Inhaled nitric oxide in patients with the acute respiratory distress syndrome secondary to the 2009 influenza A (H1N1) infection in Canada	Funk D J , Kumar A	Can J Anesth . 2013;60(2):212-213	2013	Embase; MEDLINE	Y	No Complications Reported
Human infection with a novel avian-origin	Gao R , Cao B , Hu Y , Feng Z , Wang D , Hu W , Chen J , Jie Z , Qiu H , Xu K , Xu X , Lu H , Zhu W , Gao Z , Xiang N , Shen Y , He Z , Gu Y , Zhang Z , Yang Y , Zhao X , Zhou L , Li X , Zou S , Zhang Y , Li X , Yang L , Guo J , Dong J , Li Q , Dong L , Zhu Y , Bai T , Wang S , Hao P , Yang W , Zhang Y , Han J , Yu H , Li D , Gao G F , Wu G , Wang Y , Yuan Z , Shu Y	New Engl J Med . 2013;368(20):1888-1897	2013	Embase; MEDLINE	Y	No Complications Reported
Severe Mycoplasma pneumoniae infection requiring extracorporeal membrane oxygenation with concomitant ischemic stroke in a child	Garcia A V , Fingeret A L , Thirumoorthi A S , Kadenhe-Chiweshe A , Kandel J J	Pediatr Pulmonol . 2013;48(1):98-101	2013	Embase; MEDLINE	Y	Less 18yr
Optimal ventilation in postoperative lung transplant	Garcia J.	Appl Cardiopulm Pathophysiol . 2013;17(2):113-	2013	Embase	Y	Duplicate
Smoking wet: Respiratory failure related to smoking tainted Marijuana cigarettes	Gilbert C R , Baram M , Cavarocchi N C	Tex Heart Inst J . 2013;40(1):64-67	2013	Embase; MEDLINE	Y	Duplicate
Use of extracorporeal membrane oxygenation in combination with high-frequency oscillatory ventilation in post-traumatic ARDS	Gothner M , Buchwald D , Schlebes A , Strauch J T , Schildhauer T A , Swol J	Acta Anaesthesiol Scand . 2013;57(3):391-394	2013	Embase; MEDLINE	Y	Duplicate
Hemostatic powder as rescue therapy in a patient with H1N1 influenza with uncontrolled colon bleeding	Granata A , Curcio G , Azzopardi N , Barresi L , Tarantino I , Traina M	Gastrointest Endosc . 2013;78(3):451-	2013	Embase; MEDLINE	Y	No Complications Reported
Prone positioning in severe acute respiratory distress syndrome	Guerin C , Reignier J , Richard J -C, Beuret P , Gacouin A , Boulain T , Mercier E , Badet M , Mercat A , Baudin O , Clavel M , Chatellier D , Jaber S , Rosselli S , Mancebo J , Sirodot M , Hilbert G , Bengler C , Richecoeur J , Gainnier M , Bayle F , Bourdin G , Leray V , Girard R , Baboi L , Ayzac L	New Engl J Med . 2013;368(23):2159-2168	2013	Embase; MEDLINE	Y	Review / M-A
Clinical features and viral diagnosis of two cases of infection with Middle East Respiratory Syndrome coronavirus: A report of nosocomial transmission	Guery B , Poissy J , El Mansouf L , Sejourne C , Ettahar N , Lemaire X , Vuotto F , Goffard A , Behillil S , Enouf V , Caro V , Mailles A , Che D , Manuguerra J -C, Mathieu D , Fontanet A , Van Der Werf S	Lancet. 2013;381(9885):2265: 2272-2265: 2272	2013	Embase; MEDLINE	Y	No Complications Reported
Amniotic fluid embolism: 10-year retrospective study in a level III maternity hospital	Guillaume A , Sananes N , Akladios C Y , Boudier E , Diemunsch P , Averous G , Nisand I , Langer B	Eur J Obstet Gynecol Reprod Biol . 2013;169(2):189-192	2013	Embase; MEDLINE	Y	No Complications Reported
Impact of acute kidney injury on outcome in patients with severe respiratory failure on extracorporeal membrane oxygenation	Haneya A , Philipp A , Bein T , Lubnow M , Muller T , Schmid C	Thorac Cardiovasc Surg . 2013;61( ): -	2013	Embase	Y	Duplicate
Extracorporeal membrane oxygenation to support whole-lung lavage in pulmonary alveolar proteinosis salvage of the drowned lungs	Hasan N , Bagga S , Monteagudo J , Hirose H , Cavarocchi N C , Hehn B T , Kavuru M S	J Bronchol Intervent Pulmonol . 2013;20(1):41-44	2013	Embase; MEDLINE	Y	Duplicate
Interstitial lung disease in a child with antisynthetase syndrome	Hayes Jr D , Baker P B , Mansour H M , Peeples M E , Nicol K K	Lung. 2013;191(4):441-443	2013	Embase; MEDLINE	Y	Less 50 patients
Unusual case of a vanishing bronchus of the left allograft in a lung transplant recipient	Hayes Jr D , Islam S , Kirkby S , Preston T J , Baker P B	Ann Thorac Med . 2013;8(4):229-230	2013	Embase	Y	Less 50 patients
Successful resuscitation after multiple injuries in the wilderness	Hill J G , Hardekopf S J , Chen J W , Krieg J C , Bracis R B , Petrillo R J , Long W B , Garrison J A , Edlich R F	J Emerg Med . 2013;44(2):440-443	2013	Embase; MEDLINE	Y	Less 50 patients
Extracorporeal membrane oxygenation instead of invasive mechanical ventilation in patients with acute respiratory distress syndrome	Hoeper M M , Wiesner O , Hadem J , Wahl O , Suhling H , Duesberg C , Sommer W , Warnecke G , Greer M , Boenisch O , Busch M , Kielstein J T , Schneider A , Haverich A , Welte T , Kuhn C	Intensive Care Med . 2013;39(11):2056-2057	2013	Embase; MEDLINE	Y	Duplicate
Paraquat poisoning in pediatric patients	Hsieh Y -W, Lin J -L, Lee S -Y, Weng C -H, Yang H -Y, Liu S -H, Wang I -K, Liang C -C, Chang C -T, Yen T -H	Pediatr Emerg Care. 2013;29(4):487-491	2013	Embase; MEDLINE	Y	Less 18yr
Intrapleural steroid instillation for multiple organ failure with acute respiratory distress syndrome	Huang P -M, Lin T -H, Tsai P -R, Ko W -J	Shock. 2013;40(5):392-397	2013	Embase; MEDLINE	Y	Not available
Novel uses of arteriovenous extracorporeal membrane carbon dioxide removal (AV-ECCO2R) - Two case studies	Hughes T , Slack A , Bernal W , Wendon J , Finney S , Willars C , Auzinger G	J Intensive Care Soc . 2013;14(2):169-173	2013	Embase	Y	Less 50 patients
Extracorporeal membrane oxygenation as a bridge to organ donation: A case report	Isnardi D I , Olivero F , Lerda R , Guermani A , Cornara G	Transplant Proc . 2013;45(7):2619-2620	2013	Embase; MEDLINE	Y	Less 50 patients
Extracorporeal membrane oxygenation is indicated for status asthmaticus refractory to maximal conventional therapy	Iwamoto T , Ikeda K , Nakajima H , Suga M , Kumano K , Hiraguri M , Imaeda T , Harada D , Shiga Y , Oku R , Nakanishi K	Ann Allergy Asthma Immunol . 2013;110(4):300-301	2013	Embase; MEDLINE	Y	Less 50 patients
Stone heart syndrome	Jongsma-van Netten H G , Otterspoor L C	Neth J Crit Care. 2013;17(5):41-	2013	Embase	Y	V-A ECMO
Amount of blood transfusions and survival in patients receiving extracorporeal membrane oxygenation (ECMO)	Kalem V , Buchwald D , Strauch J , Thomas S , Justyna S	Intensive Care Med . 2013;39( ):S306-	2013	Embase	Y	Not available
Rehabilitation following intracerebral haemorrhage secondary to extracorporeal membrane oxygenation (ECMO)	Kilsby A , Buddha S	BMJ Case Rep . 2013; ( ): -	2013	Embase	Y	Less 50 patients
Prone positioning use to hasten veno-venous ECMO weaning in ARDS	Kimmoun A , Guerci P , Bridey C , Ducrocq N , Vanhuyse F , Levy B	Intensive Care Med . 2013;39(10):1877-1879	2013	Embase; MEDLINE	Y	Not available
The use of extracorporeal membrane oxygenation in pediatric patients with sickle cell disease	Kuo K W , Cornell T T , Shanley T P , Odetola F O , Annich G M	Perfusion. 2013;28(5):424-432	2013	Embase; MEDLINE	Y	Less 18yr
Acute respiratory distress syndrome and septic cardiomyopathy: Successful application of veno-venoarterial extracorporeal membrane oxygenation	Kustermann J , Gehrmann A , Kredel M , Wurmb T , Roewer N , Muellenbach R M	Anaesthesist. 2013;62(8):639-643	2013	Embase; MEDLINE	Y	Duplicate
Uncommon cause of severe pneumonia: Co-infection of influenza B and Streptococcus	Lam K W , Sin K C , Au S Y , Yung S K	Hong Kong Med J . 2013;19(6):545-548	2013	Embase; MEDLINE	Y	Less 50 patients
Successful management of bleeding complications in patients supported with extracorporeal membrane oxygenation with primary respiratory failure	Lamb K , Cowan S W , Evans N , Pitcher H , Moritz T , Lazar M , Hirose H , Cavarocchi N C	Perfusion. 2013;28(2):125-131	2013	Embase; MEDLINE	Y	Duplicate
Female gender predicts poor outcomes with extracoporeal membrane oxygenation	Lancaster E , Frank P , Laufer D , Satou N , Tamrat M , Shemin R , Benharash P	J Invest Med . 2013;61(1):209-210	2013	Embase	Y	V-A ECMO
Congenital acinar dysplasia: Report of a case and review of literature	Langenstroer M , Carlan S J , Fanaian N , Attia S	AJP Rep . 2013;3(1):9-12	2013	Embase	Y	Less 50 patients
Reversible cardiogenic shock due to catecholamine-induced cardiomyopathy: A variant of takotsubo?	Law C , Khaliq A , Guglin M	Am J Emerg Med . 2013;31(11):1621.e1: 1621.e3-1621.e1: 1621.e3	2013	Embase; MEDLINE	Y	V-A ECMO
Infection with a novel virus causes hemorrhagic fever in China	Li W , He Y -W	Int J Infect Dis . 2013;17(7):e556: e561-e556: e561	2013	Embase; MEDLINE	Y	No Complications Reported
Combination use of a tandemheart with an extracorporeal oxygenator in the treatment of five patients with refractory cardiogenic shock after acute myocardial infarction	Li Y W , Rosenblum W D , Gass A L , Weiss M B , Aronow W S	Am J Ther . 2013;20(2):213-218	2013	Embase; MEDLINE	Y	V-A ECMO
Successful use of extracorporeal membrane oxygenation in a hematopoietic stem cell transplant patient with idiopathic pneumonia syndrome	Liao W I , Tsai S -H, Chiu S -K	Respir Care. 2013;58(2):e6: e10-e6: e10	2013	Embase; MEDLINE	Y	Less 50 patients
Lobar torsion after lung transplantation	Lin M -W, Huang S -C, Kuo S -W, Huang P -M, Hsu H -H, Lee Y -C	J Formos Med Assoc . 2013;112(2):105-108	2013	Embase; MEDLINE	Y	Less 50 patients
Extracorporeal membrane oxygenation in adult patients with severe acute respiratory failure	Lindskov C , Jensen R H , Sprogoe P , Klaaborg K E , Kirkegaard H , Severinsen I K , Lorentsen A G , Folkersen L , Ilkjaer S , Pedersen C M	Acta Anaesthesiol Scand . 2013;57(3):303-311	2013	Embase; MEDLINE	Y	Duplicate
Severe adenovirus pneumonia requiring extracorporeal membrane oxygenation support - Serotype 7 revisited	Low S Y , Tan T T , Lee C H K , Loo C M , Chew H C	Respir Med . 2013;107(11):1810-1813	2013	Embase; MEDLINE	Y	Less 50 patients
Maternal and fetal recovery after severe respiratory failure due to influenza: a case report.	Madsen K , Strange D G , Hedegaard M , Mathiesen E R , Damm P	BMC Res Notes. 2013;6( ):62-	2013	MEDLINE	Y	Less 50 patients
Veno-venous ECMO in ARDS after post-traumatic pneumonectomy	Martucci G , Panarello G , Bertani A , Occhipinti G , Pintaudi S , Arcadipane A	Intensive Care Med . 2013;39(12):2235-2236	2013	Embase; MEDLINE	Y	Less 50 patients
Patient-ventilator interaction in ARDS patients with extremely low compliance undergoing ECMO: A novel approach based on diaphragm electrical activity	Mauri T , Bellani G , Grasselli G , Confalonieri A , Rona R , Patroniti N , Pesenti A	Intensive Care Med . 2013;39(2):282-291	2013	Embase; MEDLINE	Y	Duplicate
Transesophageal echocardiographic guided placement of a right internal jugular dual-lumen venovenous extracorporeal membrane oxygenation (ECMO) catheter	Mazzeffi M , Fischer S	J Cardiothorac Vasc Anesth . 2013;27(4):e46: e47-e46: e47	2013	Embase; MEDLINE	Y	Less 50 patients
Pandemic flu and the sudden demand for ECMO resources: A mature trauma program can provide surge capacity in acute critical care crises	Michaels A J , Hill J G , Bliss D , Sperley B P , Young B P , Quint P , Shanks T R , Dalthorp J , Long W B , Morgan L J	J Trauma Acute Care Surg . 2013;74(6):1493-1497	2013	Embase; MEDLINE	Y	V-A ECMO
Reducing time on for extra-corporeal membrane oxygenation for adults with H1N1 pneumonia with the use of the Volume Diffusive Respirator	Michaels A J , Hill J G , Long W B , Sperley B P , Young B P , Park P K , Rycus P T , Bartlett R H	Am J Surg . 2013;205(5):500-504	2013	Embase; MEDLINE	Y	Less 18yr
Adult refractory hypoxemic acute respiratory distress syndrome treated with extracorporeal membrane oxygenation: The role of a regional referral center	Michaels A J , Hill J G , Long W B , Young B P , Sperley B P , Shanks T R , Morgan L J	Am J Surg . 2013;205(5):492-499	2013	Embase; MEDLINE	Y	Duplicate
Single Lung Retransplantation for Graft Infarction due to Herniation of Heart	Mohite P N , Sabashnikov A , Rao P , Zych B , Simon A	Thorac Cardiovasc Surg Rep . 2013;2(1):40-42	2013	Embase	Y	Less 50 patients
Quality assurance would be welcome	Muellenbach R M , Roewer N , Kranke P	Dtsch Arztebl Inter . 2013;110(27-28):485-	2013	Embase	Y	No Complications Reported
Oseltamivir pharmacokinetics in critically ill adults receiving extracorporeal membrane oxygenation support	Mulla H , Peek G J , Harvey C , Westrope C , Kidy Z , Ramaiah R	Anaesth Intensive Care. 2013;41(1):66-73	2013	Embase; MEDLINE	Y	No Complications Reported
Venovenous extracorporeal membrane oxygenation is effective against post-cardiotomy acute respiratory failure in adults	Nakamura H , Yamaguchi H , Amano A , Nakao T	Gen Thorac Cardiovasc Surg . 2013;61(7):402-408	2013	Embase; MEDLINE	Y	Duplicate
Gastrointestinal hemorrhage in adults requiring extracorporeal membrane oxygenation: Incidence, clinical predictors, and impact on outcomes	Nepomuceno R , White C W , Muthiah K , Bueddefeld D , Hiebert B , Arora R C , Manji R , Freed D H , Moffatt D	Can J Cardiol . 2013;29(10):S373-S374	2013	Embase	Y	V-A ECMO
Extracorporeal membrane oxygenation and severe acute respiratory distress secondary to legionella: 10 year experience	Noah M A , Ramachandra G , Hickey M M , Jenkins D R , Harvey C J , Westrope C A , Firmin R K , Peek G J	ASAIO J . 2013;59(3):328-330	2013	Embase; MEDLINE	Y	Duplicate
Extracorporeal membrane oxygenation and cerebral blood flow velocity in children	O'Brien N F , Hall M W	Pediatr Crit Care Med . 2013;14(3):e126: e134-e126: e134	2013	Embase; MEDLINE	Y	Less 18yr
Acute respiratory failure under steroid therapy for suspected allergic alveolitis	Olgemoller U , Criee C -P, Moerer O	Pneumologe. 2013;10(4):260-264	2013	Embase	Y	Duplicate
A family cluster of middle east respiratory syndrome coronavirus infections related to a likely unrecognized asymptomatic or mild case	Omrani A S , Matin M A , Haddad Q , Al-Nakhli D , Memish Z A , Albarrak A M	Int J Infect Dis . 2013;17(9):e668: e672-e668: e672	2013	Embase; MEDLINE	Y	Less 50 patients
Predicting mortality risk in patients undergoing venovenous ECMO for ARDS due to influenza A (H1N1) pneumonia: The ECMOnet score	Pappalardo F , Pieri M , Greco T , Patroniti N , Pesenti A , Arcadipane A , Ranieri V M , Gattinoni L , Landoni G , Holzgraefe B , Beutel G , Zangrillo A	Intensive Care Med . 2013;39(2):275-281	2013	Embase; MEDLINE	Y	Duplicate
Extracorporeal membrane oxygenation for pandemic influenza a(h1n1)-induced acute respiratory distress syndrome a cohort study and propensity-matched analysis	Pham T , Combes A , Roze H , Chevret S , Mercat A , Roch A , Mourvillier B , Ara-Somohano C , Bastien O , Zogheib E , Clavel M , Constan A , Richard J -C M , Brun-Buisson C , Brochard L	Am J Respir Crit Care Med . 2013;187(3):276-282	2013	Embase; MEDLINE	Y	Duplicate
Additive effect of propofol and fentanyl precipitating cardiogenic shock	Prabhakaran Ac J.	J Pharmacol Pharmather . 2013;4(3):217-219	2013	Embase	Y	No Complications Reported
Physical rehabilitation of patients in the intensive care unit requiring extracorporeal membrane oxygenation: a small case series.	Rahimi R A , Skrzat J , Reddy D R , Zanni J M , Fan E , Stephens R S , Needham D M	Phys Ther . 2013;93(2):248-255	2013	MEDLINE	Y	Less 50 patients
Psychiatric outcome after severe cardio-respiratory failure treated with extracorporeal membrane oxygenation: A case-series	Risnes I , Heldal A , Wagner K , Boye B , Haraldsen I , Leganger S , Mokleby K , Svennevig J L , Malt U F	Psychosomatics. 2013;54(5):418-427	2013	Embase; MEDLINE	Y	V-A ECMO
Prolonged duration ECMO for ARDS: Futility, native lung recovery, or transplantation?	Rosenberg A A , Haft J W , Bartlett R , Iwashyna T J , Huang S K , Lynch W R , Napolitano L M	ASAIO J . 2013;59(6):642-650	2013	Embase; MEDLINE	Y	Less 50 patients
Extracorporeal membrane oxygenation in adults: Experience from the Middle East	Sajjad M , Osman A , Mohsen S , Alanazi M , Ugurlucan M , Canver C	Asian Cardiovasc Thorac Ann . 2013;21(5):521-527	2013	Embase; MEDLINE	Y	V-A ECMO
An in vitro comparative study of fluid balance accuracies between pediatric-specific and in-linehemofiltration devices for continuous renal replacement therapy during extracorporeal membrane oxygenation	Santhanakrishnan A , Nestle T , Moore B L , Johannes A , Yoganathan A P , Paden M L	Pediatr Nephrol . 2013;28(1):183-184	2013	Embase	Y	No clinical data
Extracorporeal membrane oxygenation for interhospital transfer of a patient with severe ARDS.	Schaer C , Klarer A , Starck C , Yuen B	Am J Emerg Med . 2013;31(3):640.e1: 2-640.e1: 2	2013	MEDLINE	Y	Duplicate
Blood oxygenation and decarboxylation determinants during venovenous ECMO for respiratory failure in adults	Schmidt M , Tachon G , Devilliers C , Muller G , Hekimian G , Brechot N , Merceron S , Luyt C E , Trouillet J -L, Chastre J , Leprince P , Combes A	Intensive Care Med . 2013;39(5):838-846	2013	Embase; MEDLINE	Y	Duplicate
Donor smoking history and age in lung transplantation: A revisit	Shigemura N , Toyoda Y , Bhama J K , Gries C J , Crespo M , Johnson B , Zaldonis D , Pilewski J M , Bermudez C A	Transplantation. 2013;95(3):513-518	2013	Embase; MEDLINE	Y	Less 50 patients
Extracorporeal membrane oxygenation rescue therapy in a case of portopulmonary hypertension during liver transplantation: A case report	Stratta C , Lavezzo B , Ballaris M A , Panio A , Crucitti M , Andruetto P , Fanelli V , Grosso Marra W , Ranieri M V , Salizzoni M	Transplant Proc . 2013;45(7):2774-2775	2013	Embase; MEDLINE	Y	Less 50 patients
Predictors of a successful wean from extracorporeal membrane oxygenation (ECMO) for ARDS	Stull C , Baram M , Pitcher H , Hirose H , Guarav K , Cavarocchi N	Crit Care Med . 2013;41(12):A88-	2013	Embase	Y	V-A ECMO
[The use of extracorporeal life support and continuous venovenous haemodiafiltration in severe angiotensin converting enzyme inhibitor, calcium channel bloker and beta-blocker multidrug intoxication].	Stycula W , Borowka M , Jarosz J , Kolcz J , Skalski J	Prz Lek . 2013;70(11):993-996	2013	MEDLINE	Y	Not english
Optimal endovascular methods for placement of bicaval dual-lumen cannulae for venovenous extracorporeal membrane oxygenation	Teman N R , Haft J W , Napolitano L M	ASAIO J . 2013;59(4):442-447	2013	Embase; MEDLINE	Y	Not available
Efficacy of extracorporeal membrane oxygenation as a bridge to lung transplantation	Toyoda Y , Bhama J K , Shigemura N , Zaldonis D , Pilewski J , Crespo M , Bermudez C	J Thorac Cardiovasc Surg . 2013;145(4):1065-1071	2013	Embase; MEDLINE	Y	Not available
Early enteral nutrition in adults receiving venoarterial extracorporeal membrane oxygenation: An observational case series	Umezawa Makikado L D , Flordelis Lasierra J L , Perez-Vela J L , Colino Gomez L , Torres Sanchez E , Maroto Rodriguez B , Arribas Lopez P , Montejo Gonzalez J C	J Parenter Enter Nutr . 2013;37(2):281-284	2013	Embase; MEDLINE	Y	V-A ECMO
Caution for anabolic androgenic steroid use: A case report of multiple organ dysfunction syndrome	Unai S , Miessau J , Karbowski P , Baram M , Cavarocchi N C , Hirose H	Respir Care. 2013;58(12):e159: e163-e159: e163	2013	Embase; MEDLINE	Y	Less 50 patients
Acute respiratory distress syndrome with refractory hypoxaemia and severe septic shock caused by melioidosis: Successful treatment with veno-venous extracorporeal membrane oxygenation	Van Der Geest P J , Van Der Jagt M , Van Thiel R , Van Bommel J	Anaesth Intensive Care. 2013;41(2):262-263	2013	Embase; MEDLINE	Y	Less 50 patients
A patient with interstitial lung disease secondary to dermatomyositis: A case report and review of the literature	Verstraeten A -S, Verbrugghe W , Wuyts W	Acta Clin Belg . 2013;68(3):240-244	2013	Embase; MEDLINE	Y	Less 50 patients
Geographic access to severe ARDS referral centers in the United States	Wallace D , Angus D , Seymour C , Carr B , Boujoukos A , Kurland K , Yealy D , Kahn J	Crit Care Med . 2013;41(12):A23-	2013	Embase	Y	No Complications Reported
Extracorporeal lung support in H1N1 provoked acute respiratory failure: The experience of the German ARDS network	Weber-Carstens S , Goldmann A , Quintel M , Kalenka A , Kluge S , Peters J , Putensen C , Muller T , Rosseau S , Zwissler B , Moerer O	Dtsch Arztebl Inter . 2013;110(33-34):543: 549 and I-543: 549 and I	2013	Embase; MEDLINE	Y	No Complications Reported
Bilateral posterior ischaemic optic neuropathy after severe diabetic ketoacidosis, cardiopulmonary resuscitation and respiratory failure	Wirth C D , Leitner C , Perrig M	BMJ Case Rep . 2013; ( ): -	2013	Embase; MEDLINE	Y	Less 50 patients
Acute respiratory distress syndrome (ARDS) complicating influenza A/H1N1v infection - A clinical approach	Witczak A , Prystupa A , Kurys-Denis E , Borys M , Czuczwar M , Niemcewicz M , Kocik J , Michalak A , Pietrzak A , Chodorowska G , Krupski W , Mosiewicz J , Tomasiewicz K	Ann Agric Environ Med . 2013;20(4):820-822	2013	Embase; MEDLINE	Y	Review / M-A
Extracorporeal membrane oxygenation as treatment for acute respiratory failure and subsequent pneumothorax caused by Pneumocystis jirovecii pneumonia in a kidney transplant recipient	Wu Y -S, Lin N -C, Chen I -M, Chang S -C, Wang F -D, Huang Y -C, Wu T -H, Loong C -C	Transplant Infect Dis . 2013;15(1):E5: E8-E5: E8	2013	Embase; MEDLINE	Y	Less 50 patients
Fatal measles pneumonitis during Hodgkin's lymphoma	Wyplosz B , Lafarge M , Escaut L , Stern J -B	BMJ Case Rep . 2013; ( ): -	2013	Embase	Y	Less 50 patients
Screening for arrhythmogenic right ventricular cardiomyopathy: A value of genetic testing	Yalcinkaya E , Bugan B , Celik M , Yuksel U C	Chin Med J . 2013;126(10):2000-	2013	Embase; MEDLINE	Y	V-A ECMO
Trends and outcomes in the use of extracorporeal membrane oxygenation for adults in the United States: A 10 year survey	Yarmohammadi H , Duval S , Jain R	Circulation. 2013;128(22): -	2013	Embase	Y	Not available
Postpartum patient with congenital patent ductus arteriosus mimicking acute pulmonary embolism	Yeh T -C, Liu C -P, Tseng C -J, Liou J -C	BMJ Case Rep . 2013; ( ): -	2013	Embase; MEDLINE	Y	Less 18yr
Diffuse alveolar hemorrhage and intravascular hemolysis due to acute mitral valve regurgitation	Yeung A W -T, Lau A C -W, Shum H -P, Lam G S -M, Chan K K -C, Li S -K, Yan W -W	Crit Care Shock. 2013;16(1):3-7	2013	Embase	Y	Less 50 patients
Anesthetic management including extracorporeal membrane oxygenation therapy of liver transplant recipient with life-threatening hypoxemia -a case report-	Yoo C S , Shin Y H , Ko J S , Gwak M S , Kim G S	Korean J Anesth . 2013;65(2):151-157	2013	Embase	Y	Less 50 patients
(beta)-Amyloid oligomers in aging and alzheimer's disease	Zahs K R , Ashe K H	Front Aging Neurosci . 2013;5(JUL): -	2013	Embase	Y	No Complications Reported
Application of extracorporeal membrane oxygenation in severe ARDS secondary to pneumonia: A case report	Zhang X -H, Xiu R -X, Wu T -J, Zou X -L, Ma L -L, Wang L -X	Cent Eur J Med . 2013;8(5):658-661	2013	Embase	Y	Less 50 patients
Efficiency of gas transfer in venovenous extracorporeal membrane oxygenation: analysis of 317 cases with four different ECMO systems	Lehle K , Philipp A , Hiller K -A, Zeman F , Buchwald D , Schmid C , Dornia C , Lunz D , Muller T , Lubnow M	Intensive Care Med . 2014;40(12):1870-1877	2014	Embase	Y	No Complications Reported
Direct complications of the Avalon bicaval dual-lumen cannula in respiratory extracorporeal membrane oxygenation (ECMO): Single-center experience	Rubino A , Vuylsteke A , Jenkins D P , Fowles J -A, Hockings L , Valchanov K	Int J Artif Organs. 2014;37(10):741-747	2014	Embase	Y	Risk of Bias
Intensivist delivered quaternary severe respiratory failure retrieval service with mobile extracorporeal membrane oxygenation (ECMO) capabilities	Sherren P B , Shepherd S J , Glover G , Meadows C , Langrish C , Ioannou N , Daly K , Gooby N , Agnew A , Barrett N A	Intensive Care Med . 2014;40(1):S187-	2014	Embase	Y	Less 50 patients
Venovenous extracorporeal life support improves survival in adult trauma patients with acute hypoxemic respiratory failure: a multicenter retrospective cohort study.	Guirand DM, Okoye OT, Schmidt BS, Mansfield NJ, Aden JK, Martin RS, Cestero RF, Hines MH, Pranikoff T, Inaba K, Cannon JW.	J Trauma Acute Care Surg. 2014 May;76(5):1275-81. doi: 10.1097/TA.0000000000000213.	2014	pubmed	Y	Less 50 patients
Extracorporeal membrane oxygenation treatment for H1N1-induced acute respiratory distress syndrome (ARDS): Results of the croatian referral center for respiratory ECMO	Kutlesa M , Novokmet A , Mraovic R J , Filar B , Mardesic P , Barsic B	Int J Artif Organs. 2014;37(10):748-752	2014	Embase	Y	Less 50 patients
Partial extracorporeal carbon dioxide removal using a standard continuous renal replacement therapy device: A preliminary study	Quintard J -M, Barbot O , Thevenot F , De Matteis O , Benayoun L , Leibinger F	ASAIO J . 2014;60(5):564-569	2014	Embase	Y	Less 50 patients
Prone positioning during veno-venous extracorporeal membrane oxygenation for severe acute respiratory distress syndrome in adults	Guervilly C , Hraiech S , Gariboldi V , Xeridat F , Dizier S , Toesca R , Forel J -M, Adda M , Grisoli D , Collart F , Roch A , Papazian L	Minerva Anestesiol . 2014;80(3):307-313	2014	Embase	Y	Less 50 patients
Extracorporeal membrane oxygenation in adult patients with hematologic malignancies and severe acute respiratory failure	Wohlfarth P , Ullrich R , Staudinger T , Bojic A , Robak O , Hermann A , Lubsczyk B , Worel N , Fuhrmann V , Schoder M , Funovics M , Rabitsch W , Knoebl P , Laczika K , Locker G J , Sperr W R , Schellongowski P	Crit Care. 2014;18(1): -	2014	Embase	Y	Less 50 patients
Extracorporeal life support for acute respiratory distress syndrome due to severe Legionella pneumonia.	Bryner B, Miskulin J, Smith C, Cooley E, Grams R, Bartlett R, Annich G, Mychaliska GB.	Perfusion. 2014 Jan;29(1):39-43. doi: 10.1177/0267659113497229. Epub 2013 Jul 17.	2014	pubmed	Y	Less 50 patients
Surgical extraction after thrombosis around the Avalon dual lumen cannula.	Kalem V, Buchwald D, Strauch J, Sidiropoulos A, Meindl R, Schildhauer TA, Swol J.	Ann R Coll Surg Engl. 2014 Jan;96(1):106E-108E. doi: 10.1308/003588414X13824511649814.	2014	pubmed	Y	Less 50 patients
Concrete airway.	Park SY, Lee HB, Kim MH, Kuh JH, Choi JB, Lee YC, Kim KH.	Am J Respir Crit Care Med. 2014 Jan 1;189(1):e1-3. doi: 10.1164/rccm.201303-0435IM. No abstract available.	2014	pubmed	Y	Less 50 patients
Extracorporeal membrane oxygenation in cardiopulmonary disease in adults	Abrams D , Combes A , Brodie D	J Am Coll Cardiol . 2014;63(25 PART A):2769-2778	2014	Embase	Y	V-A ECMO
Epidemiology of haemorrhagic complications in adults undergoing extracorporeal membrane oxygenation in intensive care	Aubron C , De Puydt J , Bailey M , Belon F , Mcquilten Z , Schmidt M , Sheldrake J , Cappelier G , Scheinkestel C , Cooper J , Pellegrino V , Pilcher D	Intensive Care Med . 2014;40(1):S206-	2014	Embase	Y	V-A ECMO
Extracorporeal membrane oxygenation for refractory hypoxemia after liver transplantation in severe hepatopulmonary syndrome: A solution with pitfalls	Auzinger G , Willars C , Loveridge R , Best T , Vercueil A , Prachalias A , Heneghan M A , Wendon J	Liver Transplant . 2014;20(9):1141-1144	2014	Embase	Y	Less 50 patients
Extracorporeal membrane oxygenation before and after adult liver transplantation: Worth the effort?	Auzinger G , Willars C , Loveridge R , Vercueil A , Best T , Wendon J	Crit Care. 2014;18( ):S72-	2014	Embase	Y	Less 50 patients
Arterial complications in patients undergoing extracorporeal membrane oxygenation via femoral cannulation	Aziz F , Brehm C E , El-Banyosy A , Han D C , Atnip R G , Reed A B	Ann Vasc Surg . 2014;28(1):178-183	2014	Embase; MEDLINE	Y	V-A ECMO
Clinical experience of extracorporeal membrane oxygenation (ECMO) therapy in acute heart failure	Bakanov A , Gordeev M , Volkov V , Minin S , Bautin A	Eur J Heart Fail . 2014;16( ):7-	2014	Embase	Y	V-A ECMO
Does geography affect referral rates for extracorporeal membrane oxygenation in England?	Barnett J.	Crit Care. 2014;18( ):S114-	2014	Embase	Y	No Complications Reported
Automated inhaled nitric oxide alerts for adult extracorporeal membrane oxygenation patient identification	Belenkiy S M , Batchinsky A I , Park T S , Luellen D E , Serio-Melvin M L , Cancio L C , Pamplin J C , Chung K K , Salinas J , Cannon J W	J Trauma Acute Care Surg . 2014;77(3 SUPPL. 2):S184: S189-S184: S189	2014	Embase	Y	No Complications Reported
Extracorporeal membrane oxygenation (ECMO) use in trauma patients: A report from the national trauma data bank	Bembea M , Almuqati R , Rizkalla N , Haider A , Haut E	Pediatr Crit Care Med . 2014;15(4):11-	2014	Embase	Y	Less 18yr
White phosphorus burns and arsenic inhalation: A toxic combination	Berndtson A E , Fagin A , Sen S , Greenhalgh D G , Palmieri T L	J Burn Care Res . 2014;35(2):e128: e131-e128: e131	2014	Embase; MEDLINE	Y	Less 50 patients
Extracorporeal membrane oxygenation transport after traumatic aortic valve injury	Biscotti M , Agerstrand C , Abrams D , Takayama H , Sonett J , Brodie D , Bacchetta M	ASAIO J . 2014;60(3):353-354	2014	Embase	Y	V-A ECMO
Mechanical ventilation of ECMO patients is associated with decreased post-transplant survival	Bittle G J , Sanchez P G , Kon Z N , Rajagopal K , Pham S , Griffith B P	J Heart Lung Transplant . 2014;33(4):S286-	2014	Embase	Y	No Complications Reported
Minimally invasive mitral valve repair in Barlow's disease: Early and long-term results	Borger M A , Kaeding A F , Seeburger J , Melnitchouk S , Hoebartner M , Winkfein M , Misfeld M , Mohr F W	J Thorac Cardiovasc Surg . 2014;148(4):1379-1385	2014	Embase	Y	V-A ECMO
The cost impact of short-term ventricular assist devices and extracorporeal life support systems therapies on the National Health Service in the UK	Borisenko O , Wylie G , Payne J , Bjessmo S , Smith J , Firmin R , Yonan N	Interact Cardiovasc Thorac Surg . 2014;19(1):41-48	2014	Embase	Y	V-A ECMO
Influenza season in Reunion dominated by infuenza B virus circulation associated with numerous cases of severe disease, France, 2014	Brottet E , Vandroux D , Gauzere B A , Antok E , Jafar-Bandjee M C , Michault A , Filleul L	Eurosurveillance. 2014;19(39): -	2014	Embase	Y	No Complications Reported
An early aggressive strategy for the treatment of hanta virus cardiopulmonary syndrome: A perspective from an extracorporeal membrane oxygenation center	Brown R A , Murthy J , Manian P , Rumbaoa B , Connolly T	Clin Infect Dis . 2014;59(3):458-459	2014	Embase	Y	V-A ECMO
Extracorporeal membrane oxygenation support as a life-saving measure for acute respiratory distress syndrome after craniectomy	Bruzek A K , Vega R A , Mathern B E	J Neurosurg Anesthesiol . 2014;26(3):259-260	2014	Embase	Y	Less 50 patients
Two decades' experience with interfacility transport on extracorporeal membrane oxygenation	Bryner B , Cooley E , Copenhaver W , Brierley K , Teman N , Landis D , Rycus P , Hemmila M , Napolitano L M , Haft J , Park P K , Bartlett R H	Ann Thorac Surg . 2014;98(4):1363-1370	2014	Embase	Y	V-A ECMO
Extracorporeal life support for acute respiratory distress syndrome due to severe Legionella pneumonia	Bryner B , Miskulin J , Smith C , Cooley E , Grams R , Bartlett R , Annich G , Mychaliska G B	Perfusion. 2014;29(1):39-43	2014	Embase; MEDLINE	Y	Duplicate
Early microcirculatory impairment during therapeutic hypothermia is associated with poor outcome in post-cardiac arrest children: A prospective observational cohort study	Buijs E A B , Verboom E M , Top A P C , Andrinopoulou E -R, Buysse C M P , Ince C , Tibboel D	Resuscitation. 2014;85(3):397-404	2014	Embase	Y	No Complications Reported
Mechanical ventilation practices in patients with ARDS receiving ECMO: An international survey	Camporota L , Nicoletti E , Malafronte M , De Neef M , Mongelli V , Calderazzo M A , Caricola E V , Glover G , Meadows C , Beale R , Shankar-Hari M , Barrett N	Intensive Care Med . 2014;40(1):S186-	2014	Embase	Y	No Complications Reported
High intensive care unit admission rate for 2013-2014 influenza is associated with a low rate of vaccination	Catania J , Que L G , Govert J A , Hollingsworth J W , Wolfe C R	Am J Respir Crit Care Med . 2014;189(4):485-487	2014	Embase; MEDLINE	Y	No Complications Reported
The use of ecmo in hiv/aids with pneumocystis jirovecii pneumonia: A case report and review of the literature	Cawcutt K , Gallo De Moraes A , Lee S J , Park J G , Schears G J , Nemergut M E	ASAIO J . 2014;60(5):606-608	2014	Embase	Y	Less 50 patients
Race is an independent risk factor for mortality during ecmo for respiratory support	Chan T , Di Gennaro J , Farris R , McMullan D	Crit Care Med . 2014;42(12):A1448-	2014	Embase	Y	ELSO db
Acute kidney injury in adults receiving extracorporeal membrane oxygenation	Chen Y -C, Tsai F -C, Fang J -T, Yang C -W	J Formos Med Assoc . 2014; ( ): -	2014	Embase	Y	Review / M-A
Cardiac arrest after left subclavian venous catheter insertion	Coentrao L , Roncon-Albuquerque Jr R , Reis P , Oliveira T , Paiva J A	Intensive Care Med . 2014;40(9):1367-1368	2014	Embase	Y	Less 50 patients
ECMO: An alternative support for acute respiratory failure caused by tuberculosis?	Cogliandro V , Lapadula G , Bandera A , Muscatello A , Marcolin R , Abbruzzese C , Rona R , Gori A	Int J Tuberc Lung Dis . 2014;18(7):879: 881+i-879: 881+i	2014	Embase	Y	Less 50 patients
Extracorporeal carbon dioxide removal as an alternative to endotracheal intubation for non-invasive ventilation failure in acute exacerbation of COPD	Cole S , Barrett N A , Glover G , Langrish C I S , Meadows C , Daly K , Agnew N , Gooby N , Ioannou N	J Intensive Care Soc . 2014;15(4):344-346	2014	Embase	Y	Less 50 patients
Complicated Clostridium difficile colitis in children with cystic fibrosis: Association with gastric acid suppression?	Com G , Cetin N , O'Brien C E	J Cyst Fibrosis. 2014;13(1):37-42	2014	Embase; MEDLINE	Y	No clinical data
Position paper for the organization of extracorporeal membrane oxygenation programs for acute respiratory failure in adult patients.	Combes A , Brodie D , Bartlett R , Brochard L , Brower R , Conrad S , De Backer D , Fan E , Ferguson N , Fortenberry J , Fraser J , Gattinoni L , Lynch W , MacLaren G , Mercat A , Mueller T , Ogino M , Peek G , Pellegrino V , Pesenti A , Ranieri M , Slutsky A , Vuylsteke A , International ECMO Network (ECMONet)	Am J Respir Crit Care Med . 2014;190(5):488-496	2014	MEDLINE	Y	Review / M-A
Extracorporeal membrane oxygenation in an adult patient with septic shock after feculent aspiration	Davison D , Lagunas-Fitta M , Stillions D , Najam F , Junker C , Honig J , Seneff M	Crit Care Med . 2014;42(12):A1645-	2014	Embase	Y	Less 50 patients
Extra Corporeal Membrane Oxygenation (ECMO) in three HIV-positive patients with acute respiratory distress syndrome	De Rosa F G , Fanelli V , Corcione S , Urbino R , Bonetto C , Ricci D , Rinaldi M , Di Perri G , Bonora S , Ranieri M V	BMC Anesthesiol . 2014;14( ): -	2014	Embase	Y	Less 50 patients
Cardiac arrest and resuscitation in the pediatric intensive care unit: A prospective multicenter multinational study	del Castillo J , Lopez-Herce J , Carrillo A , Canadas S , Matamoros M , Rodriguez-Nunez A , Rodriguez-Calvo A , Castillo J d , Urbano J , Bellon J M , Dominguez P , Rodriguez R , Callejas A , Carranza D , Zeron H , Calvo A R , Marcos L , Cecchetti C -r, Silva M , Cesar R G , PilarOrive J , Nieva A M , Rodriguez-Nunez A , Parada M , Teresa M A G , Rodriguez J O , Pasquale D P , Delgado M A , Ugido…	Resuscitation. 2014;85(10):1380-1386	2014	Embase	Y	Less 18yr
Red blood cell transfusion in critically ill children (CME)	Demaret P , Tucci M , Ducruet T , Trottier H , Lacroix J	Transfusion. 2014;54(2):365-375	2014	Embase; MEDLINE	Y	Less 18yr
Effect of extracorporeal membrane oxygenation use on sedative requirements during severe ARDS	Der-Nigoghossian C , Dzierba A , Ertheridge J , Roberts R , Muir J , Brodie D , Schumaker G , Devlin J	Crit Care Med . 2014;42(12):A1539-	2014	Embase	Y	No Complications Reported
Extracorporeal membrane oxygenation in pediatric recipients of hematopoietic stem cell transplantation: An updated analysis of the Extracorporeal Life Support Organization experience	Di Nardo M , Locatelli F , Palmer K , Amodeo A , Lorusso R , Belliato M , Cecchetti C , Perrotta D , Picardo S , Bertaina A , Rutella S , Rycus P , Di Ciommo V , Holzgraefe B	Intensive Care Med . 2014;40(5):754-756	2014	Embase	Y	Less 18yr
Serum butyrylcholinesterase predicts survival after extracorporeal membrane oxygenation after cardiovascular surgery	Distelmaier K , Winter M -P, Rutzler K , Heinz G , Lang I M , Maurer G , Koinig H , Steinlechner B , Niessner A , Goliasch G	Crit Care. 2014;18(1): -	2014	Embase	Y	V-A ECMO
Lung transplantation as rescue therapy in patients too sick to be discharged from acute care	Doi A , Lee G , Snell G , Bloch M , Summerhayes R , Marasco S	Transplant Proc . 2014;46(1):256-259	2014	Embase	Y	No Complications Reported
Awake ECMO therapy in airway stenosis. Bronchoscopic treatment using laser resection	Duru J A , Menges T , Bodner J , Degen M E , Greifenberg D , Gehron J , Weigand M A , Henrich M	Anaesthesist. 2014;63(5):401-405	2014	Embase	Y	Less 50 patients
Simultaneous extracorporeal membrane oxygenation and therapeutic plasma exchange procedures are tolerable in both pediatric and adult patients	Dyer M , Neal M D , Rollins-Raval M A , Raval J S	Transfusion. 2014;54(4):1158-1165	2014	Embase; MEDLINE	Y	Less 18yr
Prediction of mortality in adult patients with severe acute lung failure receiving veno-venous extracorporeal membrane oxygenation: A prospective observational study	Enger T B , Philipp A , Videm V , Lubnow M , Wahba A , Fischer M , Schmid C , Bein T , Muller T	Crit Care. 2014;18(2): -	2014	Embase	Y	No Complications Reported
Acute respiratory distress caused by Neosartorya udagawae	Farrell J J , Kasper D J , Taneja D , Baman S , Orourke L M , Lowery K S , Sampath R , Bonomo R A , Peterson S W	Med Mycol Case Rep . 2014;6(1):1-5	2014	Embase	Y	Less 50 patients
Successful treatment of panton-valentine leukocidin-expressing staphylococcus aureus-Associated pneumonia co-infected with influenza using extracorporeal membrane oxygenation	Fujisaki N , Takahashi A , Arima T , Mizushima T , Ikeda K , Kakuchi H , Nakao A , Kotani J , Sakaida K	In Vivo. 2014;28(5):961-966	2014	Embase	Y	Less 50 patients
Clinicopathological findings of four cases of pure influenza virus A pneumonia	Fujita J , Ohtsuki Y , Higa H , Azuma M , Yoshinouchi T , Haranaga S , Higa F , Tateyama M	Intern Med . 2014;53(12):1333-1342	2014	Embase	Y	No Complications Reported
Bilateral lung transplantation in a patient with vascular ehlers-danlos syndrome	Garcia Saez D , Mohite P N , Zych B , Sabashnikov A , Moza A , Carby M , Simon A R	Ann Thorac Surg . 2014;97(5):1804-1806	2014	Embase; MEDLINE	Y	No Complications Reported
Optimal Ventilation in postoperative lung transplant	Garcia J.	Appl Cardiopulmonary Pathophysiol . 2014;17(2):113-	2014	Embase	Y	Review / M-A
Peripheral venoarterial extracorporeal membrane oxygenation in combination with intra-aortic balloon counterpulsation in Patients with cardiovascular compromise	Gass A , Palaniswamy C , Aronow W S , Kolte D , Khera S , Ahmad H , Cuomo L J , Timmermans R , Cohen M , Tang G H , Kai M , Lansman S L , Lanier G M , Malekan R , Panza J A , Spielvogel D	Cardiology. 2014;129(3):137-143	2014	Embase	Y	V-A ECMO
Chronic interstitial lung diseases in children: What's new?	Griese M.	Pediatr Pulmonol . 2014;49( ):S21-S23	2014	Embase	Y	Less 18yr
Comparison of femorofemoral and femorojugular configurations during venovenous extracorporeal membrane oxygenation for severe ARDS	Guervilly C , Dizier S , Thomas G , Jaussaud N , Morera P , Hraiech S , Klazen F , Forel J -M, Adda M , Roch A , Collart F , Papazian L	Intensive Care Med . 2014;40(10):1598-1599	2014	Embase	Y	No Complications Reported
Survival following AKI in adults who received extracorporeal cardiopulmonary resuscitation	Guru P , Kashyap R , Haile D , Pike R , Nemergut M , Aganga D , Kashani K , Schears G	Crit Care Med . 2014;42(12):A1423-	2014	Embase	Y	No Complications Reported
Living donor lobar lung transplantation: A longstanding concept being revisited with the same old nemesis	Hayes Jr D , Baker P B	Lung. 2014;192(3):449-450	2014	Embase	Y	Less 50 patients
Tracheostomy in adolescent patients bridged to lung transplantation with ambulatory venovenous extracorporeal membrane oxygenation	Hayes Jr D , Galantowicz M , Preston T J , Lloyd E A , Tobias J D , McConnell P I	J Artif Organs. 2014;17(1):103-105	2014	Embase	Y	Less 50 patients
Pulmonary embolism after cesarean section and successful treatment with early application of extracorporeal membrane oxygenation system and anticoagulant agents	Ho Y -K, Wang C -P, Wu Y -L, Lee T -H, Ying T -H, Lee M -S	Taiwanese J Obstet Gynecol . 2014;53(2):273-275	2014	Embase	Y	Less 50 patients
A cluster of lung injury associated with home humidifier use: Clinical, radiological and pathological description of a new syndrome	Hong S -B, Kim H J , Huh J W , Do K -H, Jang S J , Song J S , Choi S -J, Heo Y , Kim Y -B, Lim C -M, Chae E J , Lee H , Jung M , Lee K , Lee M -S, Koh Y	Thorax. 2014;69(8):694-702	2014	Embase; MEDLINE	Y	No Complications Reported
Prognosis of patients with acute respiratory distress syndrome on extracorporeal membrane oxygenation: The impact of urine output on mortality	Hsiao C -C, Chang C -H, Fan P -C, Ho H -T, Jenq C -C, Kao K -C, Chiu L -C, Lee S -Y, Hsu H -H, Tian Y -C, Hung C -C, Fang J -T, Yang C -W, Tsai F -C, Chen Y -C	Ann Thorac Surg . 2014;97(6):1939-1944	2014	Embase; MEDLINE	Y	V-A ECMO
Anticoagulation monitoring during extracorporeal membrane oxygenation in adult patients	Iapichino G E , Panigada M , L'Acqua C , Cressoni M , Bottino N , Gattinoni L	Intensive Care Med . 2014;40(1):S209-	2014	Embase	Y	No Complications Reported
Successful use of extracorporeal membrane oxygenation in the reversal of cardiorespiratory failure induced by atonic uterine bleeding: A case report	Itagaki T , Onodera M , Okuda N , Nakataki E , Imanaka H , Nishimura M	J Med Case Rep . 2014;8(1): -	2014	Embase	Y	Less 50 patients
Developing a standard method for apnea testing in the determination of brain death for patients on venoarterial extracorporeal membrane oxygenation: A pediatric case series	Jarrah R J , Ajizian S J , Agarwal S , Copus S C , Nakagawa T A	Pediatr Crit Care Med . 2014;15(2):e38: e43-e38: e43	2014	Embase; MEDLINE	Y	V-A ECMO
Outcome of patients with infective endocarditis who were treated with extracorporeal membrane oxygenation and continuous renal replacement therapy	John S G , William P , Murugapandian S , Thajudeen B	Clin Pract . 2014;4(3): -	2014	Embase	Y	Less 50 patients
Extracorporeal membrane oxygenation: look out for a retrieval team coming to a hospital near you!	Jones N , Yusuff H , Fowles J , Nichols A , Webb S T	J Perioper Pract. 2014;24(7/8/2015):172-177	2014	MEDLINE	Y	No Complications Reported
Surgical extraction after thrombosis around the Avalon dual lumen cannula.	Kalem V , Buchwald D , Strauch J , Sidiropoulos A , Meindl R , Schildhauer T A , Swol J	Ann R Coll Surg Engl . 2014;96(1):106E: 108E-106E: 108E	2014	MEDLINE	Y	Duplicate
Insufficient serum levels of antituberculosis agents during venovenous extracorporeal membrane oxygenation therapy for acute respiratory distress syndrome in a patient with miliary tuberculosis	Kim H -S, Lee E S , Cho Y -J	ASAIO J . 2014;60(4):484-486	2014	Embase	Y	Less 50 patients
An optimal transition time to extracorporeal cardiopulmonary resuscitation for predicting good neurological outcome in patients with out-of-hospital cardiac arrest: A propensity-matched study	Kim S J , Jung J S , Park J H , Park J S , Hong Y S , Lee S W	Crit Care. 2014;18(5):1-15	2014	Embase	Y	V-A ECMO
Reexpansion pulmonary edema: Review of pediatric cases	Kira S.	Paediatr Anaesth . 2014;24(3):249-256	2014	Embase; MEDLINE	Y	Less 18yr
Extracorporeal membrane oxygenation therapy for pulmonary decompression illness	Kondo Y , Fukami M , Kukita I	Crit Care. 2014;18(3): -	2014	Embase	Y	Less 50 patients
Noninvasive positive pressure ventilation in critically ill children with cardiac disease	Kovacikova L , Skrak P , Dobos D , Zahorec M	Pediatr Cardiol . 2014;35(4):676-683	2014	Embase; MEDLINE	Y	Less 18yr
Combination of positioning therapy and venovenous extracorporeal membrane oxygenation in ARDS patients	Kredel M , Bischof L , Wurmb T E , Roewer N , Muellenbach R M	Perfusion. 2014;29(2):171-177	2014	Embase	Y	Not available
Resurrection of ECMO in India and the initial experience in cardiorespiratory failure	Krishan K , Kumar R , Malhotra R	J Heart Lung Transplant . 2014;33(4):S266-	2014	Embase	Y	V-A ECMO
Use of extracorporeal membrane oxygenation in adults	Lafci G , Budak A B , Yener A U , Cicek O F	Heart Lung Circul . 2014;23(1):10-23	2014	Embase; MEDLINE	Y	Review / M-A
Extracorporeal membrane oxygenation: Experience in acute graft failure after heart transplantation	Lehmann S , Uhlemann M , Etz C D , Garbade J , Schroeter T , Borger M , Misfeld M , Bittner H B , Mohr F W	Clin Transplant . 2014;28(7):789-796	2014	Embase	Y	V-A ECMO
Extra-corporeal membrane oxygenation and diffuse alveolar haemorrhage in systemic vasculitides: A ssingle centre case series and analysis of the elso database	Ling C -Y, Simpson T , Glover G , Meadows C , Lams B , Ioannou N , D'Cruz D	Rheumatology. 2014;53( ):i56-	2014	Embase	Y	Less 50 patients
Extra-corporeal membrane oxygenation and diffuse alveolar haemorrhage-a single centre case series and analysis of the elso database	Ling C Y , Simpson T , Glover G , Nicholas B , D'Cruz D	Ann Rheum Dis . 2014;73( ): -	2014	Embase	Y	Duplicate
Extracorporeal membrane oxygenation as rescue therapy for H7N9 influenzaassociated acute respiratory distress syndrome	Liu C , Li J , Sun W , Yang R , Lu W , Gao D , Wu D	Chin Med J . 2014;127(9):1798-	2014	Embase	Y	Less 50 patients
Safety and efficacy of recombinant activated factor VII for refractory hemorrhage in pediatric patients on extracorporeal membrane oxygenation: A single center review	Long M T , Wagner D , Maslach-Hubbard A , Pasko D A , Baldridge P , Annich G M	Perfusion. 2014;29(2):163-170	2014	Embase	Y	Less 18yr
Technical complications during veno-venous extracorporeal membrane oxygenation and their relevance predicting a system-exchange - Retrospective analysis of 265 cases	Lubnow M , Philipp A , Foltan M , Enger T B , Lunz D , Bein T , Haneya A , Schmid C , Riegger G , Muller T , Lehle K	PLoS ONE. 2014;9(12): -	2014	Embase	Y	Risk of Bias
Surgery of postinfarction ventricular septal rupture: The effect of David infarct exclusion versus Daggett direct septal closure on early and late outcomes	Lundblad R , Abdelnoor M	J Thorac Cardiovasc Surg . 2014;148(6):2736-2742	2014	Embase	Y	V-A ECMO
Extubation to facilitate mothernullbaby bonding in refractory acute respiratory distress syndrome	MacLaren G , Ramanathan K R , Sorokin V	Intensive Care Med . 2014;40(10):1558-1559	2014	Embase	Y	Less 18yr
Extracorporeal membrane oxygenation: A hope for ILD exacerbations with a possible reversible pathology	Malhotra A , Nangia V	Indian J Crit Care Med . 2014;18( ):S23-S24	2014	Embase	Y	Less 50 patients
Resource use trends in extracorporeal membrane oxygenation in adults: An analysis of the Nationwide Inpatient Sample 1998-2009	Maxwell B G , Powers A J , Sheikh A Y , Lee P H U , Lobato R L , Wong J K	J Thorac Cardiovasc Surg . 2014;148(2):416: 421.e1-416: 421.e1	2014	Embase; MEDLINE	Y	No Complications Reported
Extracorporeal membrane oxygenation for respiratory failure in the elderly: A review of the extracorporeal life support organization registry	Mendiratta P , Rycus P , Prodhan P	J Am Geriatr Soc . 2014;62( ):S233-	2014	Embase	Y	ELSO db
Prolonged use of extracorporeal membrane oxygenation as a rescue modality following traumatic brain injury	Messing J A , Agnihothri R V , Van Dusen R , Najam F , Dunne J R , Honig J R , Sarani B	ASAIO J . 2014;60(5):597-599	2014	Embase	Y	Less 50 patients
Incorporating an adult extra corporal life support program in the burn intensive care unit	Mitchell C , Mueller M R , Negaard K A , Peak T F , King B T , Chung K K , Cannon J W , Renz E M	J Burn Care Res . 2014;35( ):S132-	2014	Embase	Y	Not available
Extracorporeal membrane oxygenation support after Ivor-Lewis esophagectomy for esophageal adenocarcinoma	Mokashi S , Rajab T K , Lee L Y , McCain D A , Abdel-Razek A M , Elmann E M	Ann Thorac Surg . 2014;97(3):1073-1075	2014	Embase; MEDLINE	Y	Less 50 patients
First experiences with a combined usage of veno-arterial and veno-venous ECMO in therapy-refractory cardiogenic shock patients with cerebral hypoxemia	Moravec R , Neitzel T , Stiller M , Hofmann B , Metz D , Bucher M , Silber R , Bushnaq H , Raspe C	Perfusion. 2014;29(3):200-209	2014	Embase	Y	V-A ECMO
Patient with liver dysfunction while maintained on veno-venous extracorporeal membrane oxygenation should not be overlooked as a potential donor	Mourad M M , Reay M , Muiesan P , Mirza D F , Perera M T P R	Transplant Int . 2014;27(6):e50: e53-e50: e53	2014	Embase	Y	Less 50 patients
Effects of venovenous extracorporeal membrane oxygenation on cerebral oxygenation in hypercapnic ARDS	Muellenbach R M , Kilgenstein C , Kranke P , Kustermann J , Kredel M , Roewer N , Ernestus R I , Westermaier T	Perfusion. 2014;29(2):139-141	2014	Embase; MEDLINE	Y	Less 50 patients
Serum S100B protein could help to detect cerebral complications associated with extracorporeal membrane oxygenation (ECMO)	Nguyen D N , Huyghens L , Wellens F , Schiettecatte J , Smitz J , Vincent J -L	Neurocrit Care. 2014;20(3):367-374	2014	Embase	Y	Not available
Severe hypoxemia during veno-venous extracorporeal membrane oxygenation: Exploring the limits of extracorporeal respiratory support	Nunes L B , Mendes P V , Hirota A S , Barbosa E V , Maciel A T , Schettino G P P , Costa E L V , Azevedo L C P , Park M	Clinics. 2014;69(3):173-178	2014	MEDLINE	Y	Review / M-A
Pulmonary resection for bronchial polyp after lung transplant in a cystic fibrosis patient	Olszowiec-Chlebna M , Ruszczyk-Bilecka T , Jerzynska J , Majak P , Grzelewski T , Pryt L , Stelmach I	Exp Clin Transplant . 2014;12(1):81-84	2014	Embase	Y	Less 50 patients
A 27-year-old woman presenting with refractory hypoxaemic respiratory failure, haemoptysis and thyrotoxicosis: A rare manifestation of propylthiouracil therapy	Ortiz-Diaz E. O.	BMJ Case Rep . 2014; ( ): -	2014	Embase	Y	Less 50 patients
Profound hypoxemia after multi-system trauma: Ecmo and heparin in the setting of acute hemorrhage	Pakula A , Ballinger B	Crit Care Med . 2014;42(12):A1635-	2014	Embase	Y	Less 50 patients
Invasive pulmonary aspergillosis post extracorporeal membrane oxygenation support and literature review	Parcell B J , B C Raju P K , Johnson E M , Fardon T C , Olver W J	Med Mycol Case Rep . 2014;4(1):12-15	2014	Embase	Y	Less 50 patients
Induced airway obstruction under extracorporeal membrane oxygenation during treatment of life-threatening massive hemoptysis due to severe blunt chest trauma	Park J M , Kim C W , Cho H M , Son B S , Kim D H	J Thorac Dis . 2014;6(12):E255-E258	2014	Embase	Y	Less 50 patients
Concrete airway	Park S Y , Lee H B , Kim M H , Kuh J H , Choi J B , Lee Y C , Kim K H	Am J Respir Crit Care Med . 2014;189(1):e1: e3-e1: e3	2014	Embase; MEDLINE	Y	Duplicate
Intensive pulmonary support using extracorporeal membrane oxygenation for adult liver transplant recipients with respiratory failure	Park Y , Hwang S	HPB. 2014;16( ):591-592	2014	Embase	Y	Duplicate
Systemic lupus-induced diffuse alveolar hemorrhage treated with extracorporeal membrane oxygenation: A case report and review of the literature	Patel J J , Lipchik R J	J Intensive Care Med . 2014;29(2):104-109	2014	Embase; MEDLINE	Y	Less 50 patients
Rare case of severe cholangiopathy following critical illness	Patel K V , Zaman S , Chang F , Wilkinson M	BMJ Case Rep . 2014;2014( ): -	2014	Embase	Y	Less 50 patients
Ruling out false-positive urinary Legionella pneumophila serogroup 1 and Streptococcus pneumoniae antigen test results by heating urine	Pontoizeau C , Dangers L , Jarlier V , Luyt C E , Guiller E , Fievet M H , Lecso-Bornet M , Aubry A , Brossier F	J Clin Microbiol . 2014;52(12):4347-4349	2014	Embase	Y	No Complications Reported
A rare case of rapidly enlarging tracheal lobular capillary hemangioma presenting as difficult to ventilate acute asthma during pregnancy	Prakash S , Bihari S , Wiersema U	BMC Pulm Med . 2014;14(1): -	2014	Embase; MEDLINE	Y	Less 50 patients
Whole genome analysis of a community-associated methicillin-resistant Staphylococcus aureus ST59 isolate from a case of human sepsis and severe pneumonia in China	Qu T , Feng Y , Jiang Y , Zhu P , Wei Z , Chen Y , Otto M , Yu Y	PLoS ONE. 2014;9(2): -	2014	Embase	Y	No Complications Reported
Advanced respiratory care techniques in a severe adult respiratory failure unit	Rafiq D , Needham A , Porter R , Lau G	Crit Care. 2014;18( ):S112-	2014	Embase	Y	No Complications Reported
Haemophagocytic lymphohistiocytosis associated with coccidiomycosis	Ramsi M , Alvira C , Purohit P , Cornfield D	BMJ Case Rep . 2014; ( ): -	2014	Embase	Y	No Complications Reported
Inter-hospital transfer of ECMO-assisted patients with a portable miniaturized ECMO device: 4 years of experience	Raspe C , Ruckert F , Metz D , Hofmann B , Neitzel T , Stiller M , Gielen S , Nestler F , Ebbighausen N , Steinke T , Bucher M , Bushnaq H	Perfusion. 2014;30(1):52-59	2014	Embase	Y	Less 18yr
Urgent cadaver lobar lung transplantation in pediatric cystic fibrosis: Report of a case	Reig J P , Sole A , Ansotegui E , Escriva J , Pastor J A	Chest. 2014;145(3): -	2014	Embase	Y	Less 50 patients
Death of woman with peripartum influenza b virus infection and necrotizing Pneumonia	Rein J L , Etra A M , Patel J J , Stein J L , Rivers A L , Gershengorn H B , Awerbuch E , Kreiswirth B N , Koshy S C	Emerg Infect Dis . 2014;20(7):1259-1260	2014	Embase	Y	Less 50 patients
Outcome of acute respiratory distress syndrome patients treated with extracorporeal membrane oxygenation and brought to a referral center	Roch A , Hraiech S , Masson E , Grisoli D , Forel J -M, Boucekine M , Morera P , Guervilly C , Adda M , Dizier S , Toesca R , Collart F , Papazian L	Intensive Care Med . 2014;40(1):74-83	2014	Embase; MEDLINE	Y	Duplicate
Feasibility of bedside open lung biopsy in patients treated with extracorporeal membrane oxygenation	Roze H , Thumerel M , Ouattara A , Jougon J	Intensive Care Med . 2014;40(11):1789-1790	2014	Embase	Y	No Complications Reported
A pilot study to examine the effect of extracorporeal membrane oxygenation (ECMO) on plasma factor XIII levels	Sanchez D , Crary S , Fiser R , Schmitz M , Prodhan P , Tang X , Nick T , Stine K	Pediatr Blood Cancer. 2014;61( ):S77-	2014	Embase	Y	Less 18yr
Extracorporeal membrane oxygenation for graft failure after heart transplantation: A multidisciplinary approach to maximize weaning rate	Santise G , Panarello G , Ruperto C , Turrisi M , Pilato G , Giunta A , Sciacca S , Pilato M	Int J Artif Organs. 2014;37(9):706-714	2014	Embase	Y	V-A ECMO
Burkholderia pyrrocinia in cystic fibrosis lung transplantation: A case Report	Savi D , De Biase R V , Amaddeo A , Anile M , Venuta F , Ruberto F , Simmonds N , Cimino G , Quattrucci S	Transplant Proc . 2014;46(1):295-297	2014	Embase	Y	Less 50 patients
Impact of fluid balance on outcome of adult patients treated with extracorporeal membrane oxygenation	Schmidt M , Bailey M , Kelly J , Hodgson C , Cooper D J , Scheinkestel C , Pellegrino V , Bellomo R , Pilcher D	Intensive Care Med . 2014;40(9):1256-1266	2014	Embase	Y	Not available
Predicting survival after extracorporeal membrane oxygenation for severe acute respiratory failure: The Respiratory Extracorporeal Membrane Oxygenation Survival Prediction (RESP) score	Schmidt M , Bailey M , Sheldrake J , Hodgson C , Aubron C , Rycus P T , Scheinkestel C , Cooper D J , Brodie D , Pellegrino V , Combes A , Pilcher D	Am J Respir Crit Care Med . 2014;189(11):1374-1382	2014	Embase; MEDLINE	Y	ELSO db
Mechanical ventilation management during extracorporeal membrane oxygenation for acute respiratory distress syndrome: A retrospective international multicenter study	Schmidt M , Stewart C , Bailey M , Nieszkowska A , Kelly J , Murphy L , Pilcher D , Cooper D J , Scheinkestel C , Pellegrino V , Forrest P , Combes A , Hodgson C	Intensive Care Med . 2014;40(1):S10-	2014	Embase	Y	Duplicate
Rescue bedside laparotomy in the intensive care unit in patients too unstable for transport to the operating room	Schreiber J , Nierhaus A , Vettorazzi E , Braune S A , Frings D P , Vashist Y , Izbicki J R , Kluge S	Crit Care. 2014;18(3): -	2014	Embase	Y	No Complications Reported
Pregnancy-related H1N1 influenza and severe acute respiratory distress syndrome successfully treated with extracorporeal membrane oxygenation despite difficult vascular access	Seczynska B , Jankowski M , Nowak I , Szczeklik W , Szuldrzynski K , Krolikowski W	Pol Arch Med Wewn . 2014;124(3):136-137	2014	Embase	Y	Less 50 patients
Extracorporeal membrane oxygenation (ECMO) in cystic fibrosis	Shah N , Perrin F	Paediatr Respir Rev . 2014;15(S1):26-28	2014	Embase	Y	Less 50 patients
A man in his 40s with a history of hypertension and alcohol dependency presenting to the ed with respiratory distress	Shiloh A L , Kazzi M G , Mathew R , Eisen L A , Carlese A J	Chest. 2014;145(2):e3: e6-e3: e6	2014	Embase; MEDLINE	Y	Less 50 patients
Extra-corporeal membrane oxygenation and diffuse alveolar haemorrhage-a single centre case series and analysis of the elso database	Simpson T R G , Ling C Y , Glover G , Barrett N , Ioannou N , Lams B , Langrish C , Meadows C , Agarwal N , D'Cruz D	Thorax. 2014;69( ):A195-A196	2014	Embase	Y	Less 50 patients
Heparin induced thrombocytopenia in extracorporeal life support: A systematic review of argatroban	Smith Z , To L , Nemeh H	Crit Care Med . 2014;42(12):A1472-	2014	Embase	Y	Review / M-A
Extracorporeal life support for adults with severe acute respiratory failure	Sorbo L D , Cypel M , Fan E	Lancet Respir Med . 2014;2(2):154-164	2014	Embase; MEDLINE	Y	Review / M-A
Successful use of extracorporeal membrane oxygenation for respiratory failure in pulmonary chronic graft-versus-host disease	Stretch R , Bonde P	ASAIO J . 2014;60(1):122-123	2014	Embase; MEDLINE	Y	Less 50 patients
Emergent severe acute respiratory distress syndrome caused by adenovirus type 55 in immunocompetent adults in 2013: A prospective observational study	Sun B , He H , Wang Z , Qu J , Li X , Ban C , Wan J , Cao B , Tong Z , Wang C	Crit Care. 2014;18(4): -	2014	Embase	Y	Less 50 patients
Veno-venous extracorporeal membrane oxygenation in obese surgical patients with hypercapnic lung failure	Swol J , Buchwald D , Dudda M , Strauch J , Schildhauer T A	Acta Anaesthesiol Scand . 2014;58(5):534-538	2014	Embase	Y	Not available
Unique reassortant of influenza A(H7N9) virus associated with severe disease emerging in Hong Kong	To K K W , Song W , Lau S -Y, Que T -L, Lung D C , Hung I F N , Chen H , Yuen K -Y	J Infect . 2014;69(1):60-68	2014	Embase	Y	No clinical data
Impact of bypass flow rate and catheter position in veno-venous extracorporeal membrane oxygenation on gas exchange in vivo	Togo K , Takewa Y , Katagiri N , Fujii Y , Kishimoto S , Date K , Miyamoto Y , Tatsumi E	J Artif Organs. 2014; ( ): -	2014	Embase	Y	Other
Influenza A (H1N1) vs non-H1N1 ARDS: Analysis of clinical course	Topfer L , Menk M , Weber-Carstens S , Spies C , Wernecke K -D, Uhrig A , Lojewski C , Jorres A , Deja M	J Crit Care. 2014;29(3):340-346	2014	Embase	Y	Not available
Inhaled flolan versus inhaled veletri for refractory hypoxemia in critically ill patients	Torbic H , Szumita P , Anger K , Nuccio P , Lagambina S , Weinhouse G	Crit Care Med . 2014;42(12):A1543-	2014	Embase	Y	No Complications Reported
Heart-lung transplantation: Adult indications and outcomes	Toyoda Y , Toyoda Y	J Thorac Dis . 2014;6(8):1138-1142	2014	Embase	Y	Review / M-A
Lung ultrasound imaging in avian influenza A (H7N9) respiratory failure	Tsai N W , Ngai C W , Mok K L , Tsung J W	Crit Ultrasound J . 2014;6(1):1-8	2014	Embase	Y	No Complications Reported
Venoarterial extracorporeal life support in post-traumatic shock and cardiac arrest: lessons learned.	Tseng Y H , Wu T I , Liu Y C , Lin P J , Wu M Y	Scand J Trauma Resusc Emerg Med. 2014;22( ):12-	2014	MEDLINE	Y	V-A ECMO
Ambulatory ECMO as a bridge to lung transplant in a previously well pediatric patient with ARDS	Turner D A , Rehder K J , Bonadonna D , Gray A , Lin S , Zaas D , Cheifetz I M	Pediatrics. 2014;134(2):e583: e585-e583: e585	2014	Embase; MEDLINE	Y	Less 18yr
Common yew intoxication: A case report	Valis M , Koci J , Tucek D , Lutonsky T , Kopova J , Barton P , Vysata O , Krajickova D , Korabecny J , Masopust J , Klzo L	J Med Case Rep . 2014;8(1): -	2014	Embase	Y	Less 50 patients
Perioperative factors associated with in-hospital mortality or retransplantation in pediatric heart transplant recipients	Vanderlaan R D , Manlhiot C , Conway J , Honjo O , McCrindle B W , Dipchand A I	J Thorac Cardiovasc Surg . 2014;148(1):282-289	2014	Embase; MEDLINE	Y	Less 18yr
Extracorporeal life support in critically ill adults.	Ventetuolo C E , Muratore C S	Am J Respir Crit Care Med . 2014;190(5):497-508	2014	MEDLINE	Y	Review / M-A
Melody(registered trademark) pulmonary valve bacterial endocarditis: Experience in four pediatric patients and a review of the literature	Villafane J , Baker G H , Austin E H , Miller S , Peng L , Beekman R	Catheter Cardiovasc Interventions. 2014;84(2):212-218	2014	Embase	Y	Less 18yr
Extracorporeal rewarming of deep accidental hypothermia victims	Walpoth B.	High Alt Med Biol . 2014;15(2):A276-	2014	Embase	Y	Less 50 patients
Contralateral pulmonary artery banding after single lobar lung transplantation	Watanabe T , Okada Y , Adachi O , Sado T , Toyama H , Noda M , Hoshikawa Y , Oishi H , Sasahara Y , Saiki Y , Kondo T	Ann Thorac Surg . 2014;97(4):1429-1431	2014	Embase; MEDLINE	Y	Less 50 patients
Venoarterial extracorporeal membrane oxygenation for the management of massive amlodipine overdose	Weinberg R L , Bouchard N C , Abrams D C , Bacchetta M , Dzierba A L , Burkart K M , Brodie D	Perfusion. 2014;29(1):53-56	2014	Embase; MEDLINE	Y	V-A ECMO
Prognostic factors, long-term survival, and outcome of cancer patients receiving chemotherapy in the intensive care unit	Wohlfarth P , Staudinger T , Sperr W R , Bojic A , Robak O , Hermann A , Laczika K , Carlstrom A , Riss K , Rabitsch W , Bojic M , Knoebl P , Locker G J , Obiditsch M , Fuhrmann V , Schellongowski P	Ann Hematol . 2014;93(10):1629-1636	2014	Embase	Y	No Complications Reported
Right ventricular loop indicating malposition of J-wire introducer for double lumen bicaval venovenous extracorporeal membrane oxygenation (VV ECMO) cannula	Yastrebov K , Manganas C , Kapalli T , Peeceeyen S	Heart Lung Circul . 2014;23(1):e4: e7-e4: e7	2014	Embase; MEDLINE	Y	Less 50 patients
Cardiac tamponade: New technology masking an old nemesis	Yates A R , Duffy V L , Clark T D , Hayes Jr D , Tobias J D , McConnell P I , Preston T J	Ann Thorac Surg . 2014;97(3):1046-1048	2014	Embase; MEDLINE	Y	V-A ECMO
Observational study of outcome according to anticoagulation strategy in adult extracorporeal membrane oxygenation patients	Yeo H J , Kim D W , Yoon S H , Lee S E , Cho W H , Jeon D , Kim Y S	Respirology. 2014;19( ):130-	2014	Embase	Y	V-A ECMO
Whole lung lavage combined with Granulocyte-macrophage colony stimulating factor inhalation for an adult case of refractory pulmonary alveolar proteinosis	Yu H Y , Sun X F , Wang Y X , Xu Z J , Huang H	BMC Pulm Med . 2014;14(1): -	2014	Embase	Y	Less 50 patients
Outcomes comparing dual-lumen to multisite venovenous ECMO in the pediatric population: The Extracorporeal Life Support Registry experience	Zamora I J , Shekerdemian L , Fallon S C , Olutoye O O , Cass D L , Rycus P L , Burgman C , Lee T C	J Pediatr Surg . 2014;49(10):1452-1457	2014	Embase	Y	Less 18yr
Survival predictors in acute respiratory distress syndrome with extracorporeal membrane oxygenation.	Chiu LC, Tsai FC, Hu HC, Chang CH, Hung CY, Lee CS, Li SH, Lin SW, Li LF, Huang CC, Chen NH, Yang CT, Chen YC, Kao KC.	Ann Thorac Surg. 2015 Jan;99(1):243-50. doi: 10.1016/j.athoracsur.2014.07.064. Epub 2014 Nov 11.	2015	pubmed	Y	No Complications Reported
Capabilities of a mobile extracorporeal membrane oxygenation service for severe respiratory failure delivered by intensive care specialists.	Sherren PB, Shepherd SJ, Glover GW, Meadows CI, Langrish C, Ioannou N, Wyncoll D, Daly K, Gooby N, Agnew N, Barrett NA.	Anaesthesia. 2015 Jun;70(6):707-14. doi: 10.1111/anae.13014. Epub 2015 Feb 26.	2015	pubmed	Y	Less 50 patients
Inter-hospital transfer of ECMO-assisted patients with a portable miniaturized ECMO device: 4 years of experience.	RaspÃ© C, RÃ¼ckert F, Metz D, Hofmann B, Neitzel T, Stiller M, Gielen S, Nestler F, Ebbighausen N, Steinke T, Bucher M, Bushnaq H.	Perfusion. 2015 Jan;30(1):52-9. doi: 10.1177/0267659114531611. Epub 2014 Apr 17.	2015	pubmed	Y	Less 50 patients
Efficacy of veno-venous extracorporeal membrane oxygenation in severe acute respiratory failure	Lee J J , Hwang S M , Ko J H , Kim H S , Hong K S , Choi H H , Lee M G , Lee C Y , Lee W K , Soun E J , Lee T H , Seo J Y	Yonsei Med J . 2015;56(1):212-219	2015	Embase	Y	Less 50 patients
Efficacy of veno-venous extracorporeal membrane oxygenation in severe acute respiratory failure.	Lee JJ, Hwang SM, Ko JH, Kim HS, Hong KS, Choi HH, Lee MG, Lee CY, Lee WK, Soun EJ, Lee TH, Seo JY.	Yonsei Med J. 2015 Jan;56(1):212-9. doi: 10.3349/ymj.2015.56.1.212.	2015	pubmed	Y	Less 50 patients
Use of extracorporeal membrane oxygenation in severe traumatic lung injury with respiratory failure.	Wu SC, Chen WT, Lin HH, Fu CY, Wang YC, Lo HC, Cheng HT, Tzeng CW.	Am J Emerg Med. 2015 May;33(5):658-62. doi: 10.1016/j.ajem.2015.02.007. Epub 2015 Feb 7.	2015	pubmed	Y	Less 50 patients
Survival predictors in acute respiratory distress syndrome with extracorporeal membrane oxygenation	Chiu L -C, Tsai F -C, Hu H -C, Chang C -H, Hung C -Y, Lee C -S, Li S -H, Lin S -W, Li L -F, Huang C -C, Chen N -H, Yang C -T, Chen Y -C, Kao K -C	Ann Thorac Surg . 2015;99(1):243-250	2015	Embase	Y	Not available
A risk score to predict acute renal failure in adult patients after lung transplantation	Grimm J C , Lui C , Kilic A , Valero V , Sciortino C M , Whitman G J R , Shah A S	Ann Thorac Surg . 2015;99(1):251-257	2015	Embase	Y	No Complications Reported
Electrolyte shifts across the artificial lung in patients on extracorporeal membrane oxygenation: Interdependence between partial pressure of carbon dioxide and strong ion difference	Langer T , Scotti E , Carlesso E , Protti A , Zani L , Chierichetti M , Caironi P , Gattinoni L	J Crit Care. 2015;30(1):2-6	2015	Embase	Y	No Complications Reported
Mechanical Ventilation Management During Extracorporeal Membrane Oxygenation for Acute Respiratory Distress Syndrome: A Retrospective International Multicenter Study	Schmidt M , Stewart C , Bailey M , Nieszkowska A , Kelly J , Murphy L , Pilcher D , Cooper D J , Scheinkestel C , Pellegrino V , Forrest P , Combes A , Hodgson C	Crit Care Med . 2015; ( ): -	2015	Embase	Y	Not available
Refractory cardiac arrest treated with mechanical CPR, hypothermia, ECMO and early reperfusion (the CHEER trial)	Stub D , Bernard S , Pellegrino V , Smith K , Walker T , Sheldrake J , Hockings L , Shaw J , Duffy S J , Burrell A , Cameron P , Smit V , Kaye D M	Resuscitation. 2015;86( ):88-94	2015	Embase	Y	V-A ECMO
[Case Report; A severe Pseudomonas aeruginosa community-acquired pneumonia treated by veno-venous extracorporeal membrane oxygenation (ECMO)--a case report].	Kinoshita T, Yamamoto K, Toyama S, Kuga M, Yatomi M, Yamamoto T, Kunitomo F.	Nihon Naika Gakkai Zasshi. 2015 Jan 10;104(1):107-9. Japanese. No abstract available.	2015	pubmed	Y	Less 50 patients
A PREGNANT WOMAN WITH AVIAN INFLUENZA A (H7N9) VIRUS PNEUMONIA AND ARDS MANAGED WITH EXTRACORPOREAL MEMBRANE OXYGENATION.	Wang G, Zhou Y, Gong S, Dong H, Wu G, Xiang X, Tang J.	Southeast Asian J Trop Med Public Health. 2015 May;46(3):444-8.	2015	pubmed	Y	Less 50 patients
[The first experience of transporting a patient with severe respiratory failure in conditions of extracorporeal membrane oxygenation].	Vlasov AY, Shchegolev AV, Kurmanseitov MM, Lyushnin YV, Shelukhin DA, Yakirevich LA, Golomidov AA.	Voen Med Zh. 2015 Apr;336(4):10-5. Russian.	2015	pubmed	Y	Less 50 patients
Successful extracorporeal membrane oxygenation therapy as a bridge to sequential bilateral lung transplantation for a patient after severe paraquat poisoning.	Tang X, Sun B, He H, Li H, Hu B, Qiu Z, Li J, Zhang C, Hou S, Tong Z, Dai H.	Clin Toxicol (Phila). 2015 Nov;53(9):908-13. doi: 10.3109/15563650.2015.1082183. Epub 2015 Aug 28.	2015	pubmed	Y	Less 50 patients
Defining the space between life and death: Fatal critical illness.	Murthi SB, Scalea TM.	J Trauma Acute Care Surg. 2015 Sep;79(3):493-4. doi: 10.1097/TA.0000000000000734. No abstract available.	2015	pubmed	Y	Review / M-A
Bedside placement of an endobronchial valve to aid invasive ventilation and weaning from extracorporeal membrane oxygenation.	Hodges AM, Gillham MJ, Lewis CA.	Crit Care Resusc. 2015 Sep;17(3):219-22.	2015	pubmed	Y	Less 50 patients
[Extracorporeal Membrane Oxygenation for Anesthesia Induction in a Patient with Severe Cardiorespiratory Impairment due to Mediastinal Angiosarcoma].	Matsukawa S, Daijo H, Mizota T, Fukuda K.	Masui. 2015 Feb;64(2):180-4. Japanese.	2015	pubmed	Y	Less 50 patients
Acute Respiratory Distress Syndrome With and Without Extracorporeal Membrane Oxygenation: A Score Matched Study.	Tsai HC, Chang CH, Tsai FC, Fan PC, Juan KC, Lin CY, Yang HY, Kao KC, Fang JT, Yang CW, Chang SW, Chen YC.	Ann Thorac Surg. 2015 Aug;100(2):458-64. doi: 10.1016/j.athoracsur.2015.03.092. Epub 2015 Jun 24.	2015	pubmed	Y	V-A ECMO
Extracorporeal Membrane Oxygenation in Pediatric Trisomy 21: 30 Years of Experience from the Extracorporeal Life Support Organization Registry.	Cashen K, Thiagarajan RR, Collins JW Jr, Rycus PT, Backer CL, Reynolds M, Costello JM.	J Pediatr. 2015 Aug;167(2):403-8. doi: 10.1016/j.jpeds.2015.04.048. Epub 2015 May 15.	2015	pubmed	Y	Less 18yr
High-frequency percussive ventilation: a new strategy for separation from extracorporeal membrane oxygenation.	Boscolo A, Peralta A, Baratto F, Rossi S, Ori C.	A A Case Rep. 2015 Apr 1;4(7):79-84. doi: 10.1213/XAA.0000000000000131.	2015	pubmed	Y	Less 50 patients
Clinical and billing review of extracorporeal membrane oxygenation.	Blum JM, Lynch WR, Coopersmith CM.	Chest. 2015 Jun;147(6):1697-703. doi: 10.1378/chest.14-2954. Review.	2015	pubmed	Y	Review / M-A
Outcomes of pediatric patients with abdominal sepsis requiring surgery and extracorporeal membrane oxygenation using the Extracorporeal Life Support Organization database.	Phillips MR, Khoury AL, Stephenson BJ, Edwards LJ, Charles AG, McLean SE.	Am Surg. 2015 Mar;81(3):245-51.	2015	pubmed	Y	Less 18yr
Percutaneous cannulation for extracorporeal membrane oxygenation by intensivists: a retrospective single-institution case series.	Conrad SA, Grier LR, Scott LK, Green R, Jordan M.	Crit Care Med. 2015 May;43(5):1010-5. doi: 10.1097/CCM.0000000000000883.	2015	pubmed	Y	ELSO db
Use of single-cannula venous-venous extracorporeal life support in the management of life-threatening airway obstruction.	Ko M, dos Santos PR, Machuca TN, Marseu K, Waddell TK, Keshavjee S, Cypel M.	Ann Thorac Surg. 2015 Mar;99(3):e63-5. doi: 10.1016/j.athoracsur.2014.12.033.	2015	pubmed	Y	Less 50 patients
Extracorporeal membrane oxygenation: uncommon cause of corpus callosal microhemorrhage.	Shah J, Armstrong MJ.	Neurology. 2015 Feb 10;84(6):630. doi: 10.1212/WNL.0000000000001227. No abstract available.	2015	pubmed	Y	Less 50 patients
First successful combination of ECMO with cytokine removal therapy in cardiogenic septic shock: a case report.	Bruenger F, Kizner L, Weile J, Morshuis M, Gummert JF.	Int J Artif Organs. 2015 Feb;38(2):113-6. doi: 10.5301/ijao.5000382. Epub 2015 Feb 3.	2015	pubmed	Y	Less 50 patients
Canada's longest experience with extracorporeal membrane oxygenation as a bridge to lung transplantation: a case report.	Bozso S, Sidhu S, Garg M, Freed DH, Nagendran J.	Transplant Proc. 2015 Jan-Feb;47(1):186-9. doi: 10.1016/j.transproceed.2014.10.039.	2015	pubmed	Y	Less 50 patients
Right ventricular unloading after initiation of venovenous extracorporeal membrane oxygenation.	Reis Miranda D, van Thiel R, Brodie D, Bakker J.	Am J Respir Crit Care Med. 2015 Feb 1;191(3):346-8. doi: 10.1164/rccm.201408-1404LE. No abstract available.	2015	pubmed	Y	No Complications Reported
Severe adult respiratory distress syndrome from Goodpasture syndrome. Survival using extracorporeal membrane oxygenation.	Balke L, Both M, Arlt A, Rosenberg M, Bewig B.	Am J Respir Crit Care Med. 2015 Jan 15;191(2):228-9. doi: 10.1164/rccm.201409-1625IM. No abstract available.	2015	pubmed	Y	Less 50 patients
Recirculation during veno-venous extra-corporeal membrane oxygenation--a simulation study.	Broman M, Frenckner B, BjÃ¤llmark A, BroomÃ© M.	Int J Artif Organs. 2015 Jan;38(1):23-30. doi: 10.5301/ijao.5000373. Epub 2014 Dec 27.	2015	pubmed	Y	No clinical data
Antithrombin concentrates use in children on extracorporeal membrane oxygenation: a retrospective cohort study.	Wong TE, Delaney M, Gernsheimer T, Matthews DC, Brogan TV, Mazor R, McMullan DM, Reiner AP, Konkle BA.	Pediatr Crit Care Med. 2015 Mar;16(3):264-9. doi: 10.1097/PCC.0000000000000322.	2015	pubmed	Y	Less 18yr
A follow-up study on acute respiratory distress syndrome survivors after extracorporeal membrane oxygenation by pulmonary high-resolution CT.	Li XY, Sun B, Wang CT, He HY, Zhang CY, Ding Y, Peng P, Tong ZH, Zhan QY.	Arch Iran Med. 2015 Jan;18(1):6-11. doi: 0151801/AIM.004.	2015	pubmed	Y	No Complications Reported
Blood conservation in extracorporeal membrane oxygenation for acute respiratory distress syndrome.	Agerstrand CL, Burkart KM, Abrams DC, Bacchetta MD, Brodie D.	Ann Thorac Surg. 2015 Feb;99(2):590-5. doi: 10.1016/j.athoracsur.2014.08.039. Epub 2014 Dec 10.	2015	pubmed	Y	V-A ECMO
Incomplete (135Â°) prone position as an alternative to full prone position for lung recruitment in ARDS during ECMO therapy.	Brunauer A, Dankl D, DÃ¼nser MW.	Wien Klin Wochenschr. 2015 Feb;127(3-4):149-50. doi: 10.1007/s00508-014-0645-y. Epub 2014 Dec 4. No abstract available.	2015	pubmed	Y	Less 50 patients
Novel sequential bridge to lung transplant in an awake patient.	Patil NP, Popov AF, Lees NJ, Simon AR.	J Thorac Cardiovasc Surg. 2015 Jan;149(1):e2-4. doi: 10.1016/j.jtcvs.2014.10.031. Epub 2014 Oct 15. No abstract available.	2015	pubmed	Y	Less 50 patients
CASE 2--2015: extracorporeal membrane oxygenation as a bridge to clinical recovery in life-threatening autoimmune acute respiratory distress syndrome.	Kornfield ZN, Horak J, Gibbs RM, Weiss SJ, Atluri P, Augoustides JG, Gutsche JT, Sidebotham D.	J Cardiothorac Vasc Anesth. 2015 Feb;29(1):221-8. doi: 10.1053/j.jvca.2014.06.013. Epub 2014 Oct 27. No abstract available.	2015	pubmed	Y	Less 50 patients
Extracorporeal CO2 removal as bridge to lung transplantation in life-threatening hypercapnia.	Schellongowski P, Riss K, Staudinger T, Ullrich R, Krenn CG, Sitzwohl C, Bojic A, Wohlfarth P, Sperr WR, Rabitsch W, Aigner C, Taghavi S, Jaksch P, Klepetko W, Lang G.	Transpl Int. 2015 Mar;28(3):297-304. doi: 10.1111/tri.12486. Epub 2014 Dec 5.	2015	pubmed	Y	V-A ECMO
Extracorporeal membrane oxygenation use has increased by 433% in adults in the United States from 2006 to 2011.	Sauer CM, Yuh DD, Bonde P.	ASAIO J. 2015 Jan-Feb;61(1):31-6. doi: 10.1097/MAT.0000000000000160.	2015	pubmed	Y	No Complications Reported
Extracorporeal life support: experience with 2,000 patients.	Gray BW, Haft JW, Hirsch JC, Annich GM, Hirschl RB, Bartlett RH.	ASAIO J. 2015 Jan-Feb;61(1):2-7. doi: 10.1097/MAT.0000000000000150. Review.	2015	pubmed	Y	V-A ECMO
Modern use of extracorporeal life support in pregnancy and postpartum.	Sharma NS, Wille KM, Bellot SC, Diaz-Guzman E.	ASAIO J. 2015 Jan-Feb;61(1):110-4. doi: 10.1097/MAT.0000000000000154. Review.	2015	pubmed	Y	Review / M-A
National review of use of extracorporeal membrane oxygenation as respiratory support in thoracic surgery excluding lung transplantation.	Rinieri P, Peillon C, Bessou JP, Veber B, Falcoz PE, Melki J, Baste JM.	Eur J Cardiothorac Surg. 2015 Jan;47(1):87-94. doi: 10.1093/ejcts/ezu127. Epub 2014 Mar 21.	2015	pubmed	Y	Less 50 patients
[truncated: 19 more columns]

## Sheet: Quality Appraisal
					Selection	Comparability	Exposure	Outcome	Total	Random Sequence (Selection Bias)	Allocation Concealment (Selection Bias)	Blinding of participants (Performance Bias)	Blinding of outcome (Detection Bias)	Complete data (Attrition Bias)	No Selective Reporting (Reporting Bias)	Total
25	Chimot L, MarquÃ© S, Gros A, Gacouin A, LavouÃ© S, Camus C, Le Tulzo Y.	PMID:23438779	2013	Cohort Retrospective	2	0		1	3
137	Schmid C, Philipp A, Hilker M, Rupprecht L, Arlt M, Keyser A, Lubnow M, MÃ¼ller T.	PMID:21885295	2012	Cohort Prospective	3	0		3	6
149	Camboni D, Philipp A, Lubnow M, Bein T, Haneya A, Diez C, Schmid C, MÃ¼ller T.	PMID:21700473	2011	Cohort Retrospective	3	0		3	6
233	Peek GJ, Elbourne D, Mugford M, Tiruvoipati R, Wilson A, Allen E, Clemens F, Firmin R, Hardy P, Hibbert C, Jones N, Killer H, Thalanany M, Truesdale A.	PMID:20642916	2010	RCT						1	n/a	n/a	n/a	1	1	3
269	MÃ¼ller T, Philipp A, Luchner A, Karagiannidis C, Bein T, Hilker M, Rupprecht L, Langgartner J, Zimmermann M, Arlt M, Wenger J, Schmid C, Riegger GA, Pfeifer M, Lubnow M.	PMID:20017915 | PMCID:PMC2811933	2009	Cohort Retrospective	3	0		3	6
279	Davies A, Jones D, Bailey M, Beca J, Bellomo R, Blackwell N, Forrest P, Gattas D, Granger E, Herkes R, Jackson A, McGuinness S, Nair P, Pellegrino V, PettilÃ¤ V, Plunkett B, Pye R, Torzillo P, Webb S, Wilson M, Ziegenfuss M.	PMID:19822628	2009	Cohort Retrospective	3	0		3	6
458	Mols G, Loop T, Geiger K, Farthmann E, Benzing A.	PMID:11044532	2000	Cohort Prospective	4	2		3	9
826	Ma DS1, Kim JB, Jung SH, Choo SJ, Chung CH, Lee JW.	PMID:22500278	2012	Cohort Retrospective	1	0		3	4
831	Pranikoff T1, Hirschl RB, Remenapp R, Swaniker F, Bartlett RH	PMID:10084497	1999	Cohort Retrospective	2	0		1	3
1291	Rubino A , Vuylsteke A , Jenkins D P , Fowles J -A, Hockings L , Valchanov K	PMID:25361182	2014	Cohort Retrospective	2	0		2	4
1412	Haneya A, Diez C, Philipp A, Bein T, Mueller T, Schmid C, Lubnow M.	PMID:26066017	2015	Cohort Retrospective	3	0		3	6
1428	Schmidt M, Stewart C, Bailey M, Nieszkowska A, Kelly J, Murphy L, Pilcher D, Cooper DJ, Scheinkestel C, Pellegrino V, Forrest P, Combes A, Hodgson C.	PMID:25565460	2015	Cohort Retrospective	3	0		2	5
1442	Schmidt M, Stewart C, Bailey M, Nieszkowska A, Kelly J, Murphy L, Pilcher D, Cooper DJ, Scheinkestel C, Pellegrino V, Forrest P, Combes A, Hodgson C.	PMID:25565460	2015	Cohort Retrospective	3	0		2	5
1443	Schmidt M, Stewart C, Bailey M, Nieszkowska A, Kelly J, Murphy L, Pilcher D, Cooper DJ, Scheinkestel C, Pellegrino V, Forrest P, Combes A, Hodgson C.	PMID:25565460	2015	Cohort Retrospective	3	0		2	5
785	Schmidt M, Zogheib E, RozÃ© H, Repesse X, Lebreton G, Luyt CE, Trouillet JL, BrÃ©chot N, Nieszkowska A, Dupont H, Ouattara A, Leprince P, Chastre J, Combes A.	PMID:23907497	2013	Cohort Retrospective	2	0		3	5
775	Roch A, Hraiech S, Masson E, Grisoli D, Forel JM, Boucekine M, Morera P, Guervilly C, Adda M, Dizier S, Toesca R, Collart F, Papazian L.	PMID:24170143	2014	Cohort Prospective	2	0		3	5
